# Supplementary material for: Tris-hydroxymethylaminomethane (THAM): a novel organocatalyst for a environmentally benign synthesis of medicinally important tetrahydrobenzo[b]pyrans and pyran-annulated heterocycles
Source: Royal Society of Chemistry journal article supplement (doi:10.1039/c4nj02346c), 2015-01-01

## Supporting information

**Tris-hydroxymethylaminomethane (THAM): A Novel organocatalyst in environmental synthesis of medicinally privileged tetrahydrobenzo (b) pyrans and pyran annulated heterocycles at ambient temperature**

***Kapil S. Pandit,<sup>a</sup> Pramod V. Chavan,<sup>a</sup> Uday V. Desai,<sup>a\*</sup> Makarand A. Kulkarni,<sup>a</sup> Prakash P. Wadgaonkar.<sup>b</sup>***

<sup>a</sup>*Department of Chemistry, Shivaji University, Kolhapur - 416004, India;*

<sup>b</sup>*Polymer Science and Engineering Division, CSIR, National Chemical Laboratory, Pune - 411008.*

***New Journal of Chemistry 2015,***

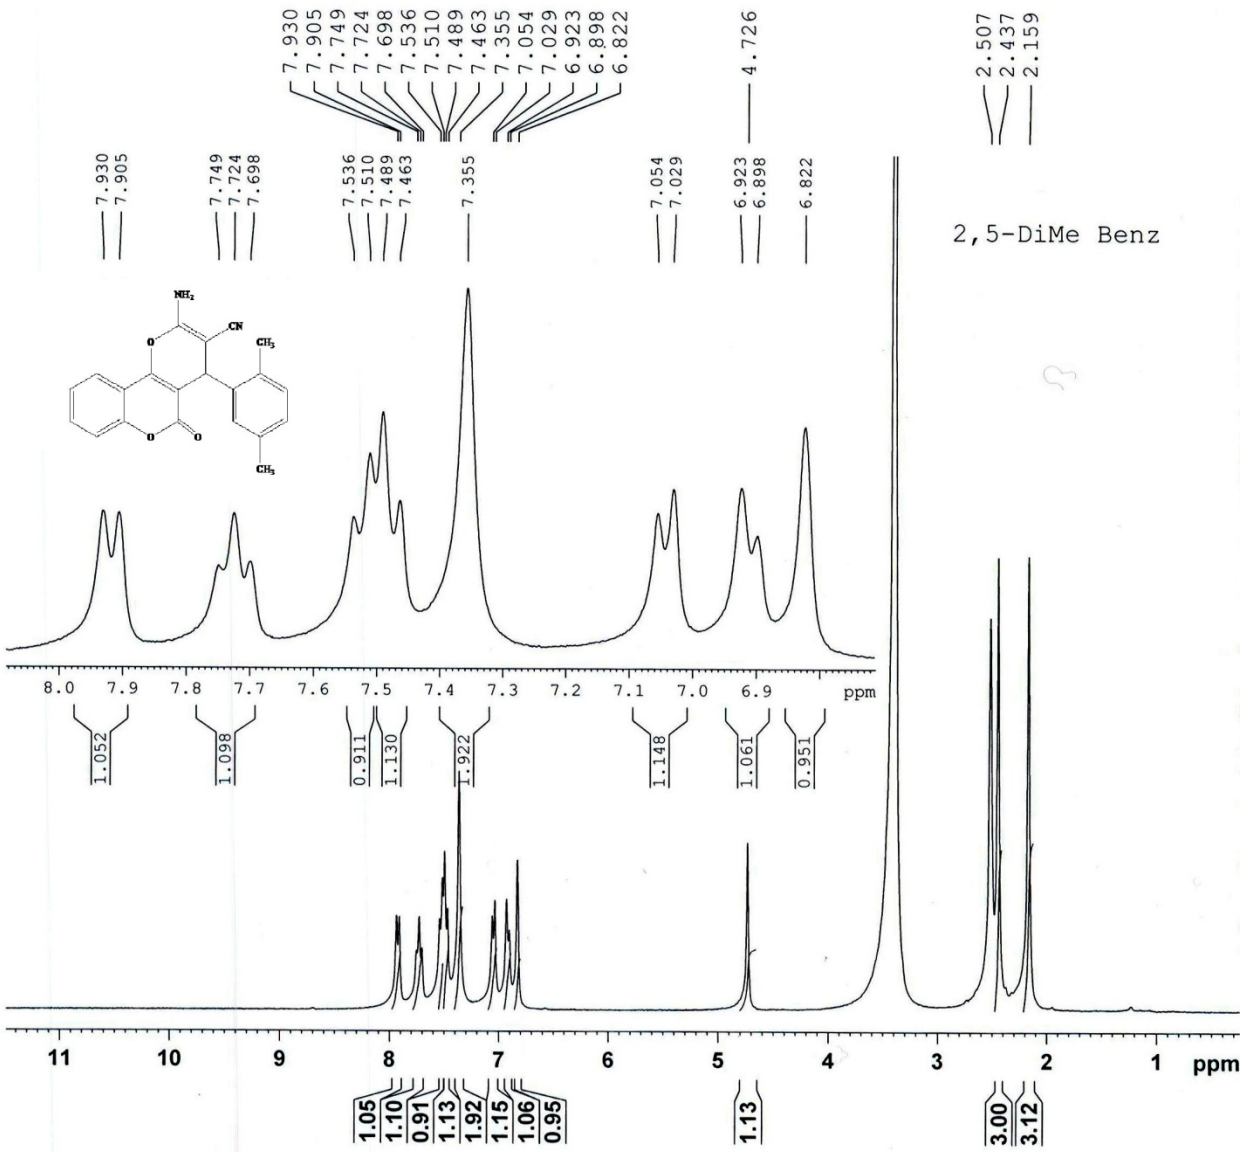

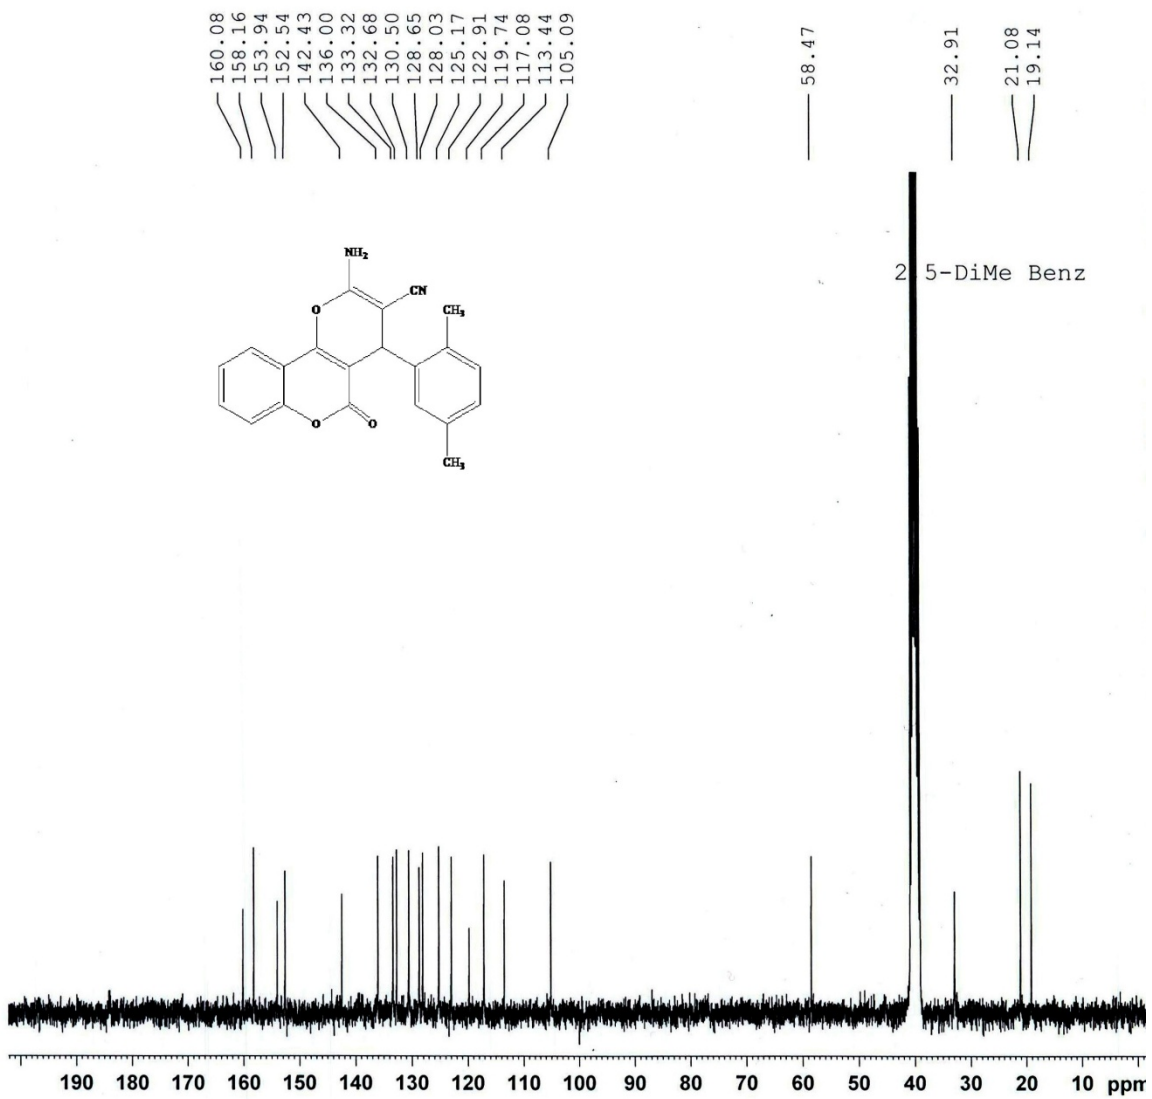

BVT-A #409 RT: 1.83 AV: 1 NL: 3.96E8  
T: FTMS + p ESI Full ms [66.70-1000.00]

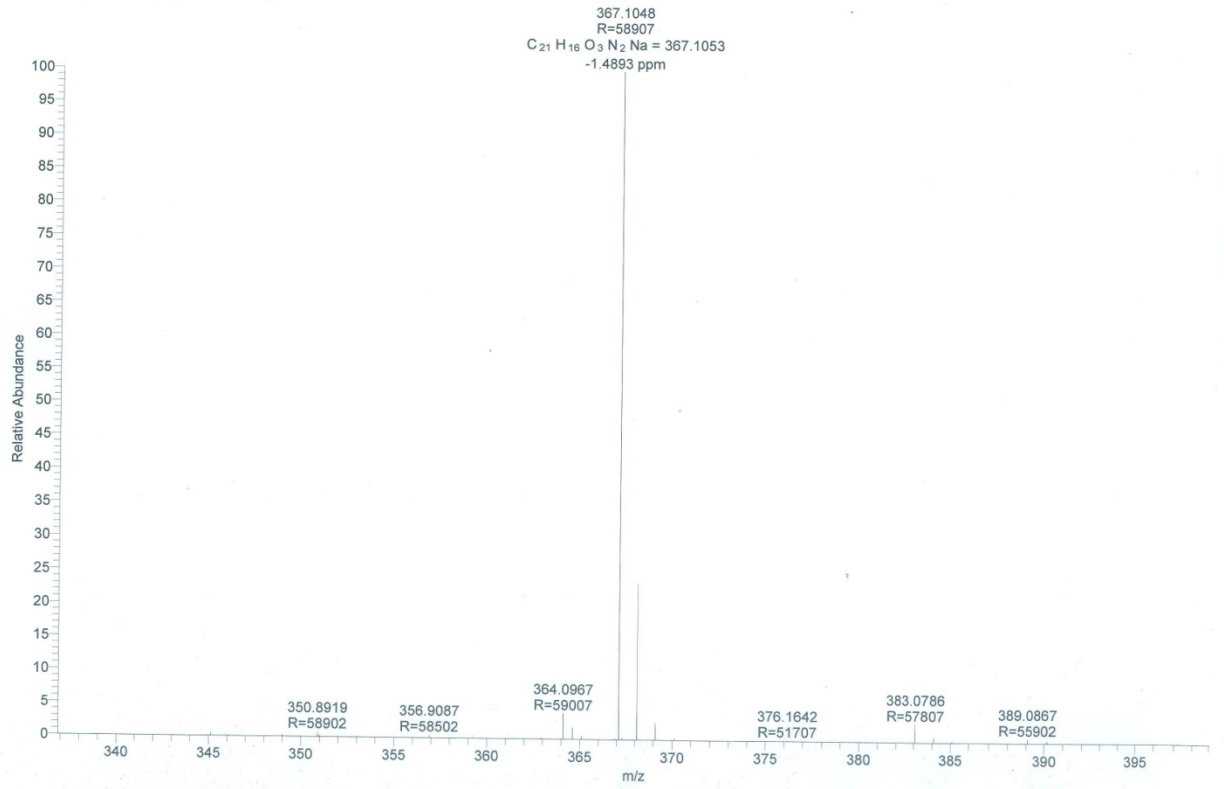



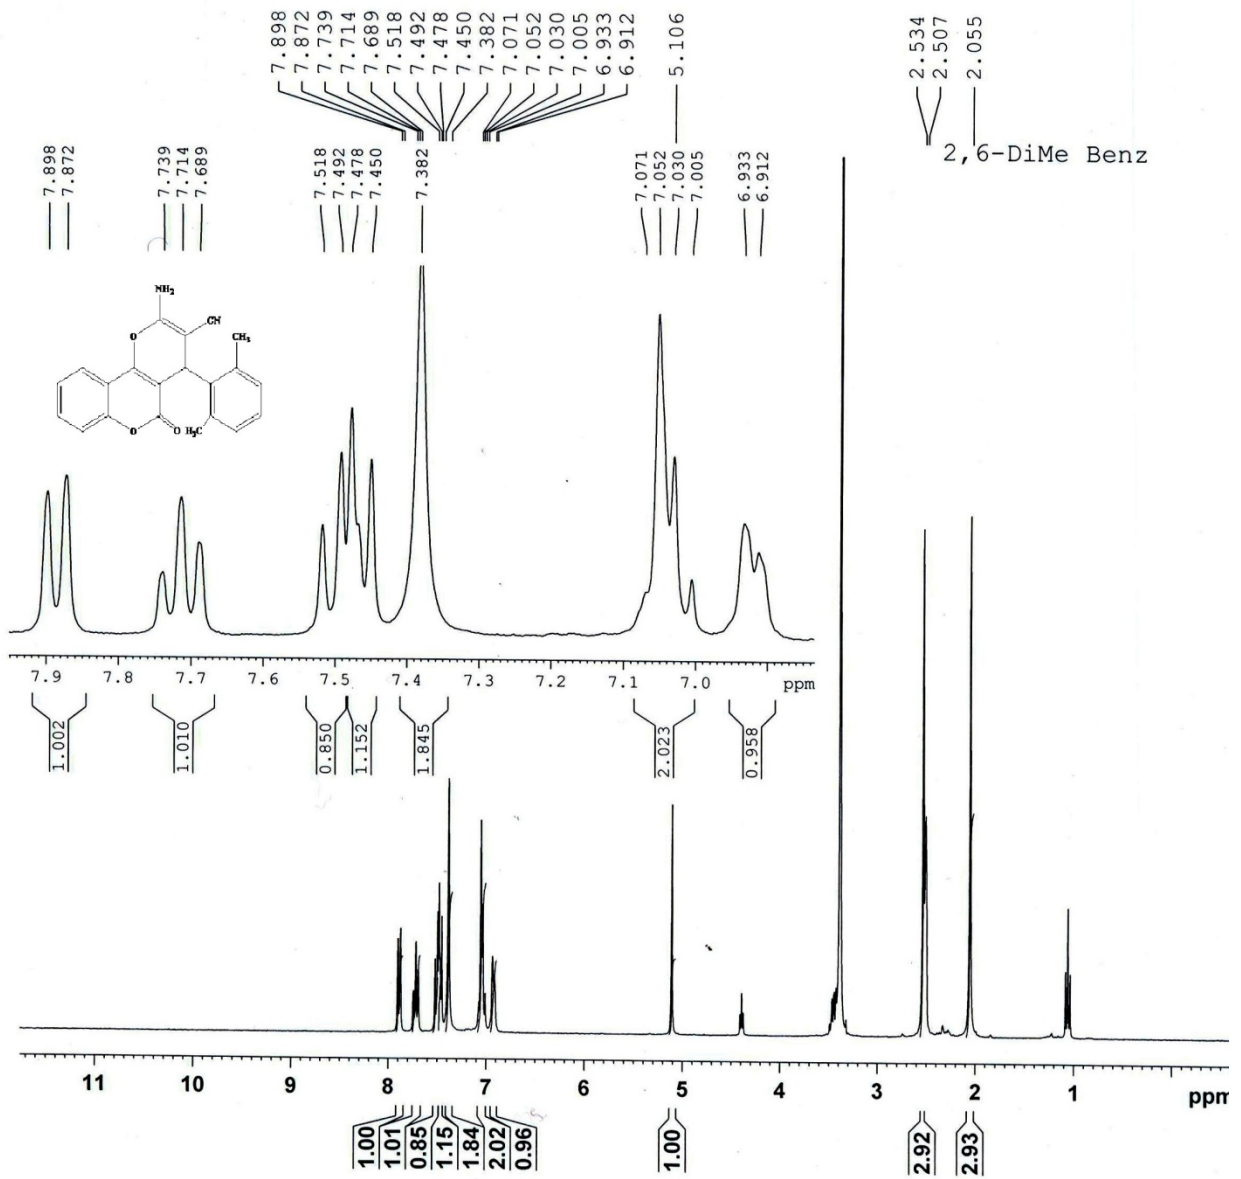

159.83  
 158.44  
 153.96  
 152.60  
 137.84  
 137.73  
 136.65  
 133.41  
 130.90  
 128.88  
 127.32  
 125.19  
 122.75  
 119.35  
 117.05  
 112.95  
 103.40

56.50  
 55.59

31.89

21.43  
 18.75

2,6-DiMe Benz

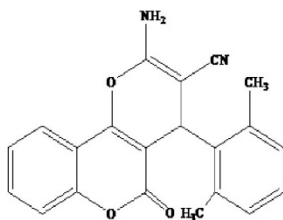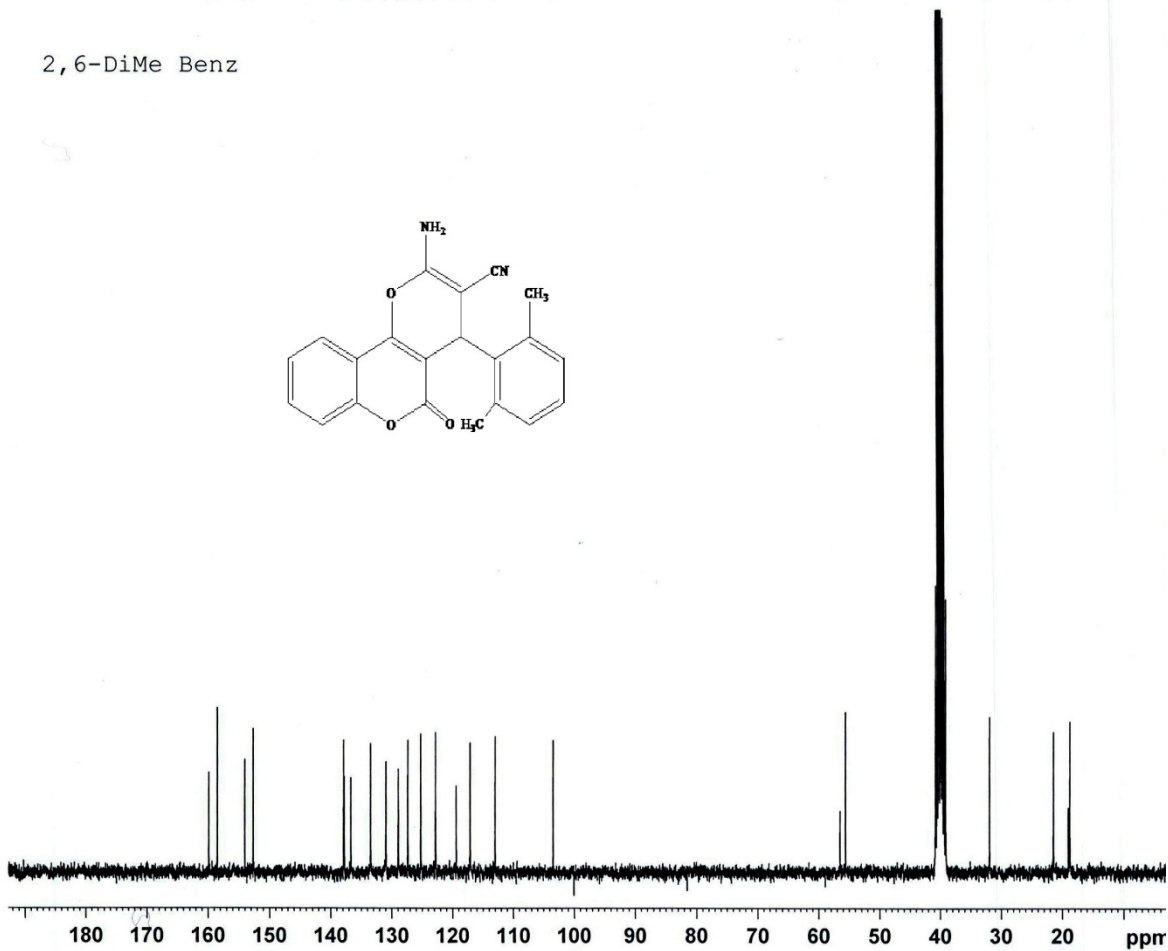

BVT-C1 #404 RT: 1.80 AV: 1 NL: 4.37E8  
T: FTMS + p ESI Full ms [66.70-1000.00]

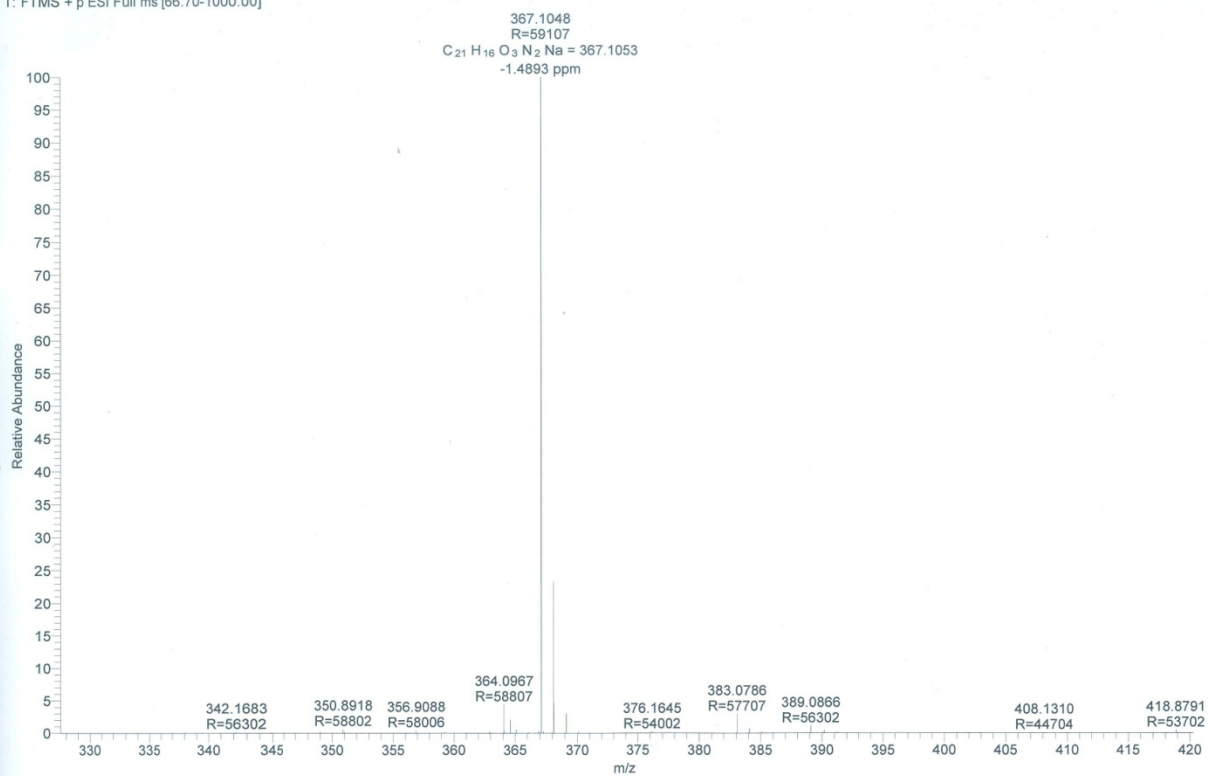

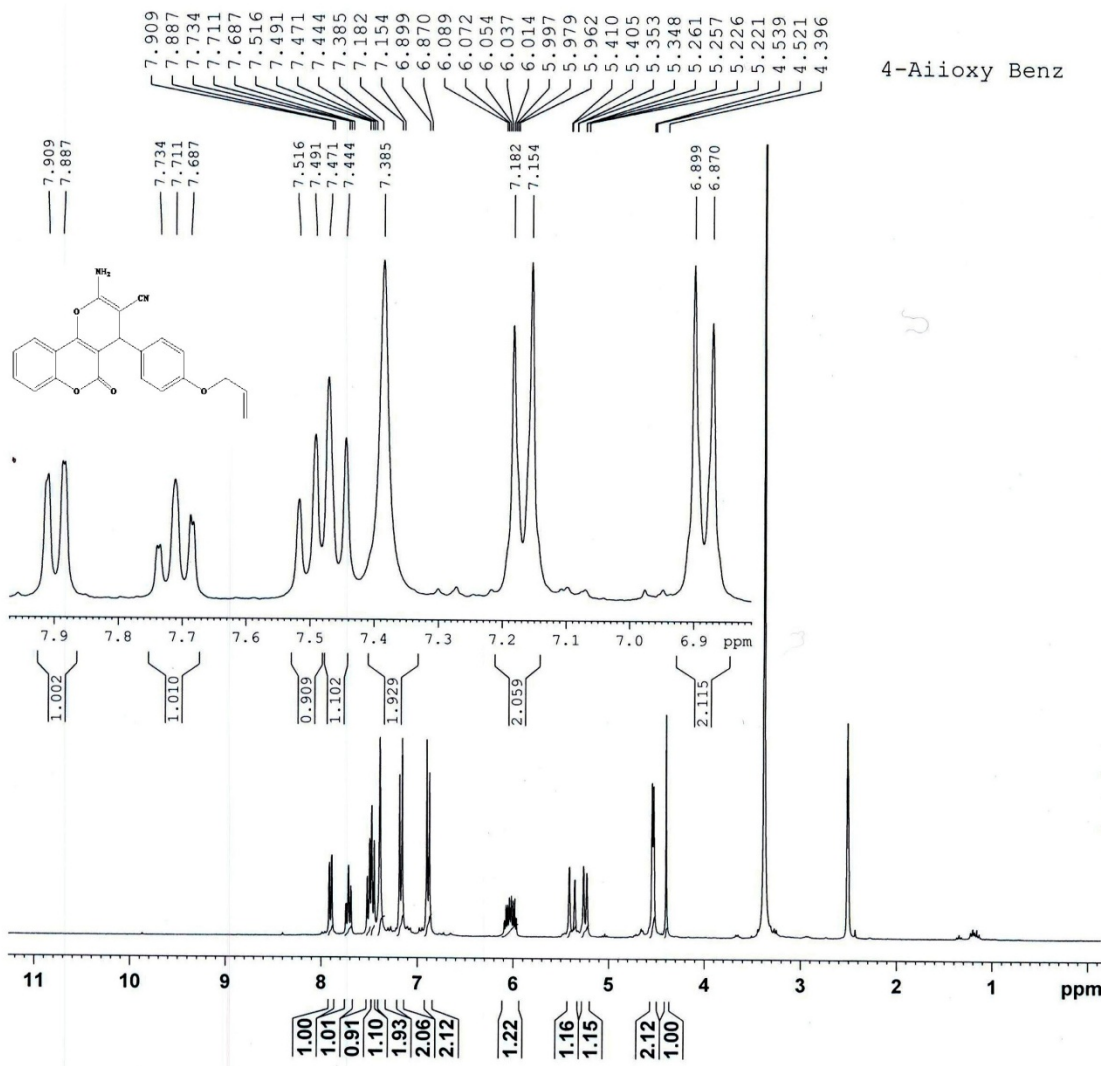

160.01  
158.39  
157.74  
153.58  
152.55  
136.00  
134.22  
133.34  
129.21  
125.13  
122.92  
119.77  
117.85  
117.02  
115.04  
113.47  
104.72

68.63

58.63

36.62

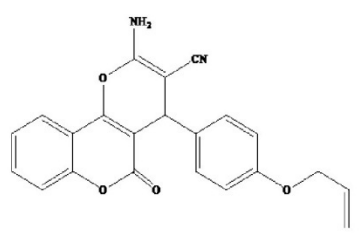

4-Alloxy Benz

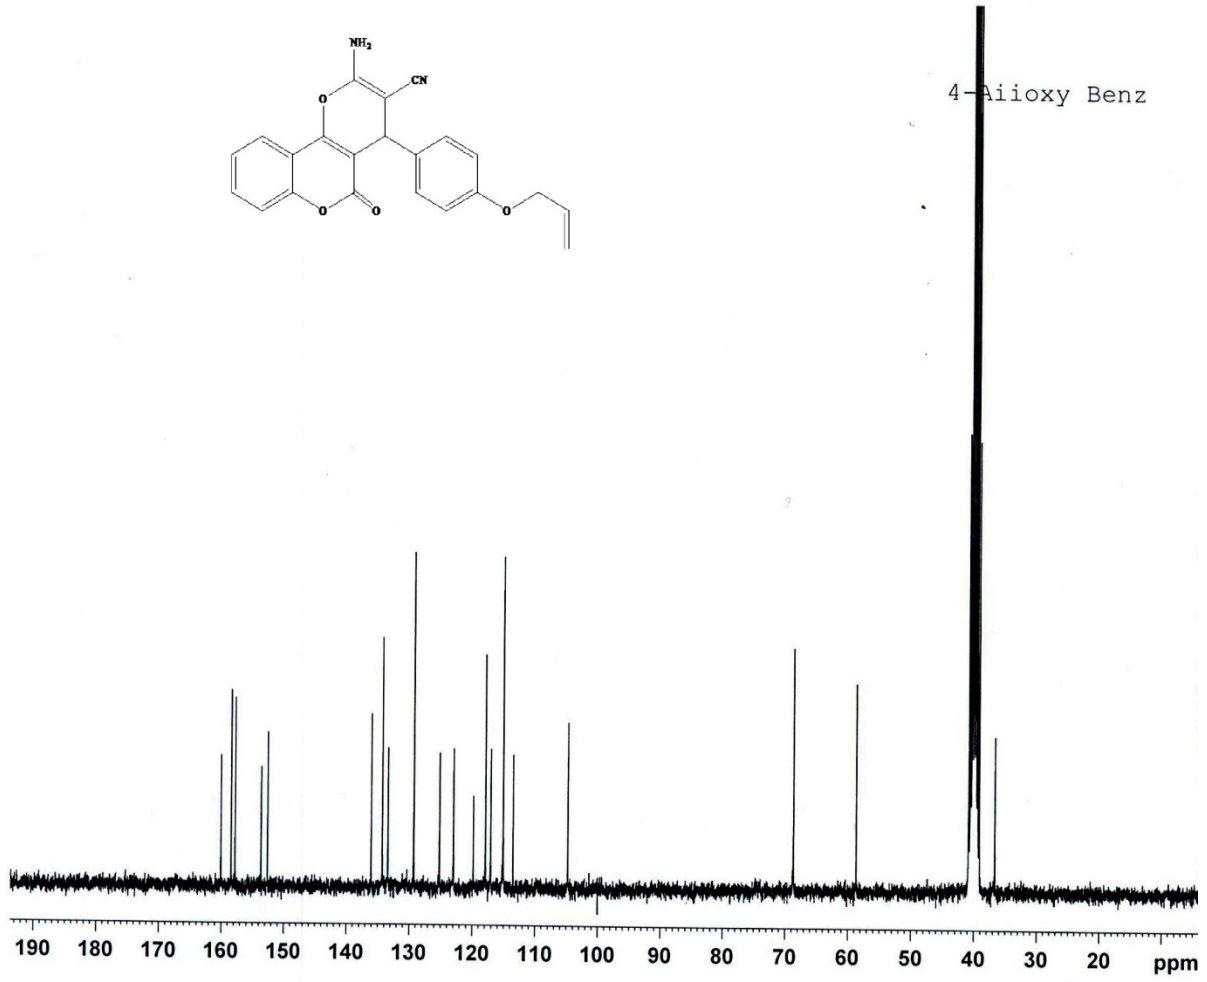

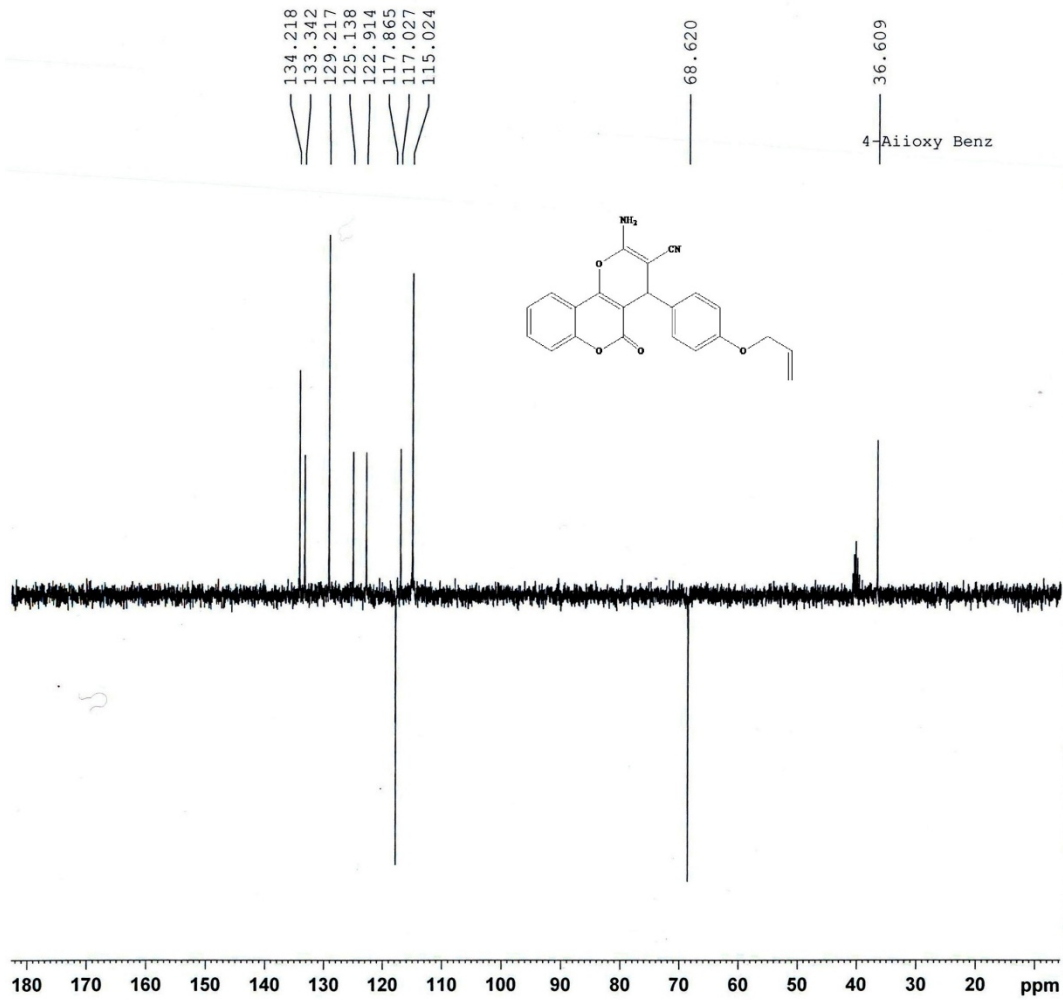

BVT-B1 #400 RT: 1.78 AV: 1 NL: 2.05E8  
T: FTMS + p ESI Full ms [66.70-1000.00]

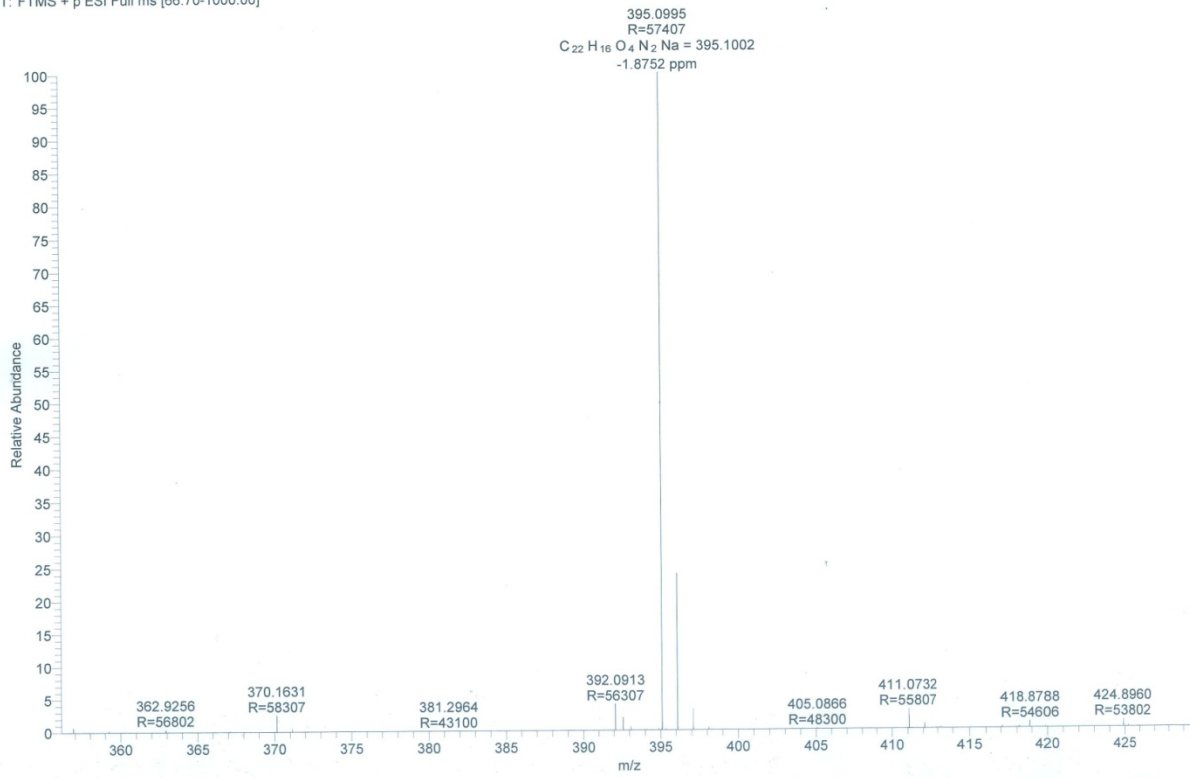

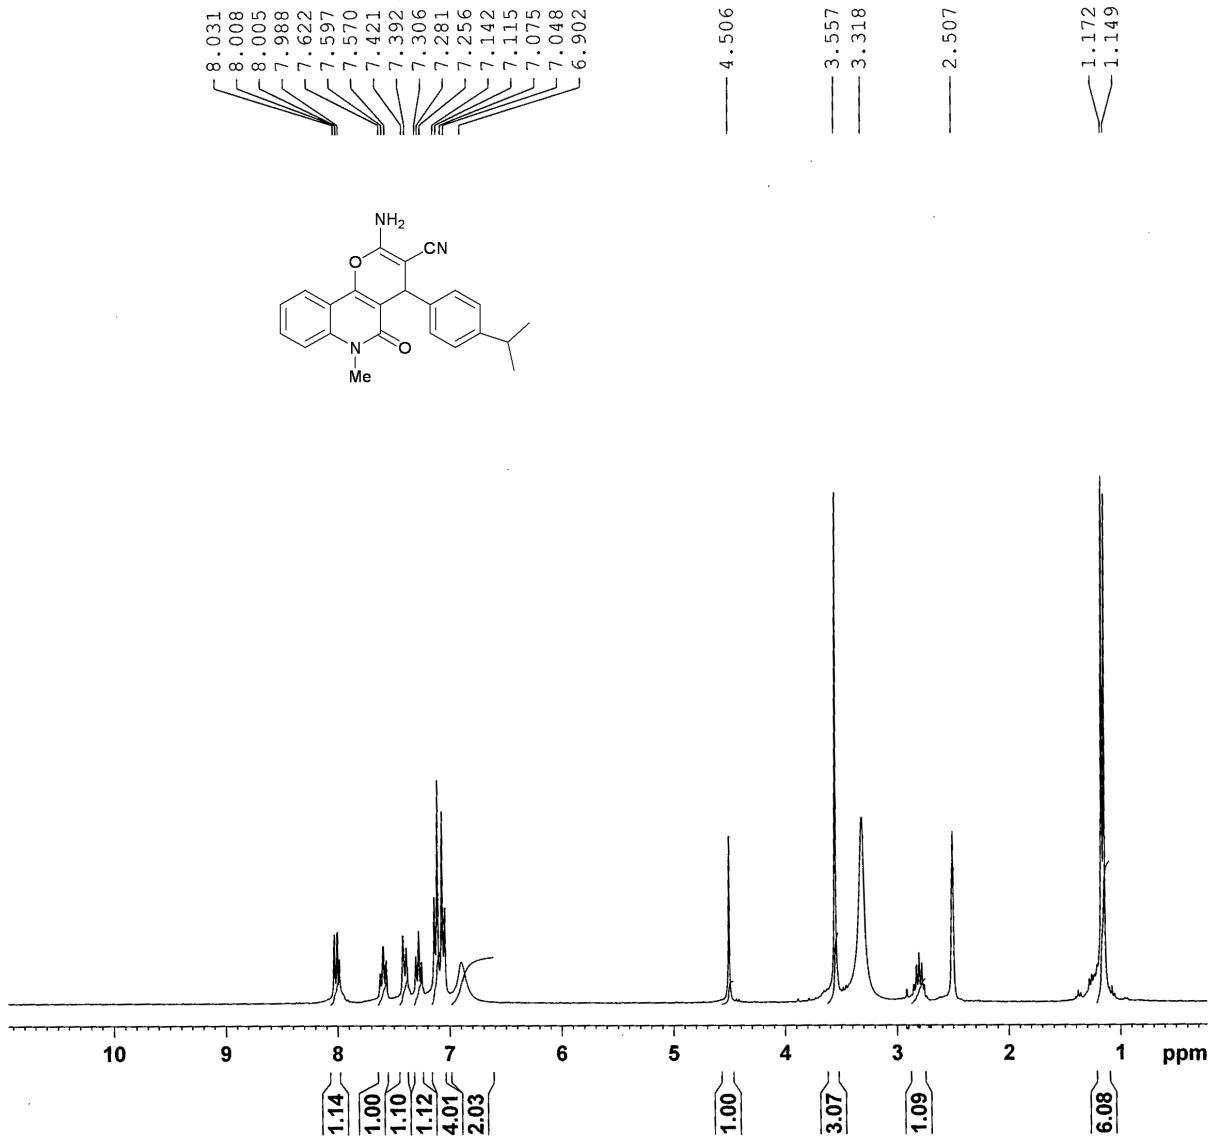



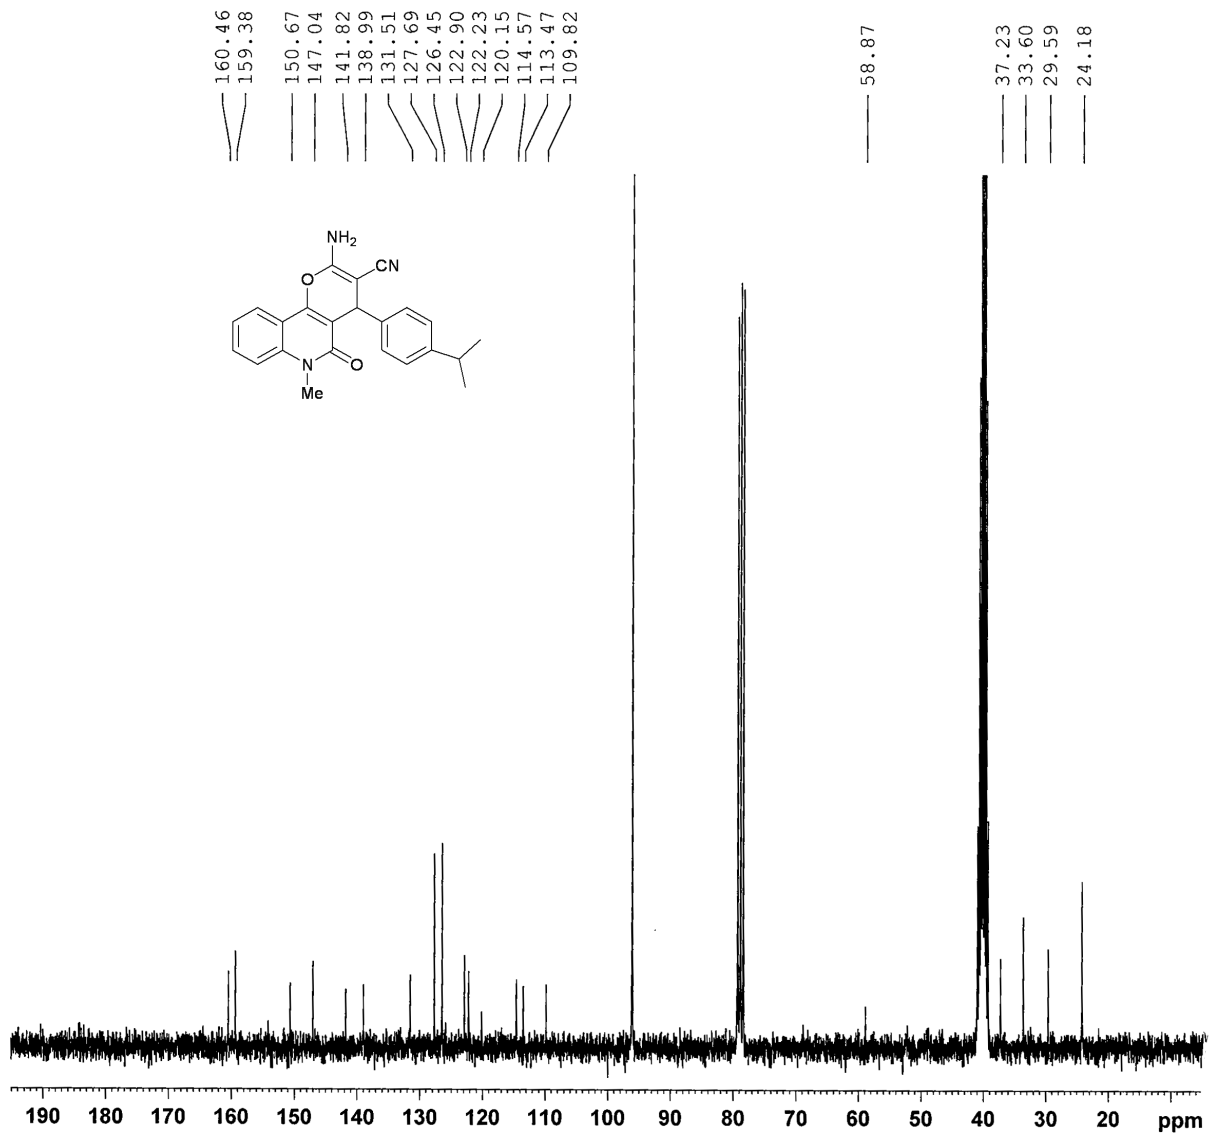

131.525  
127.688  
126.461  
122.895  
122.241  
114.586

37.227  
33.602  
29.594  
24.191

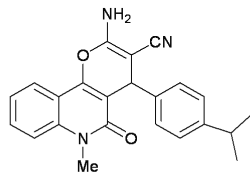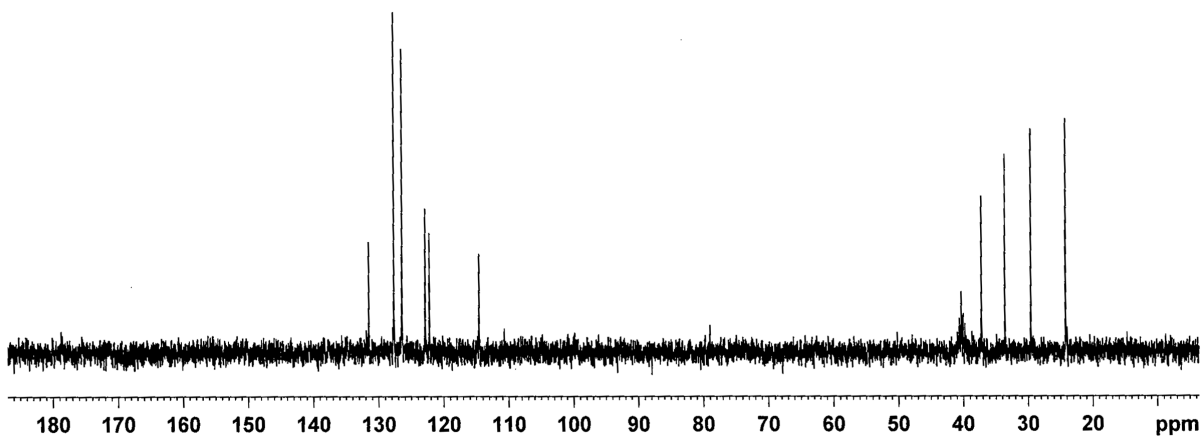

A5\_141107155132 #977 RT: 4.35 AV: 1 NL: 3.05E8  
T: FTMS+p ESI Full ms [66.70-1000.00]

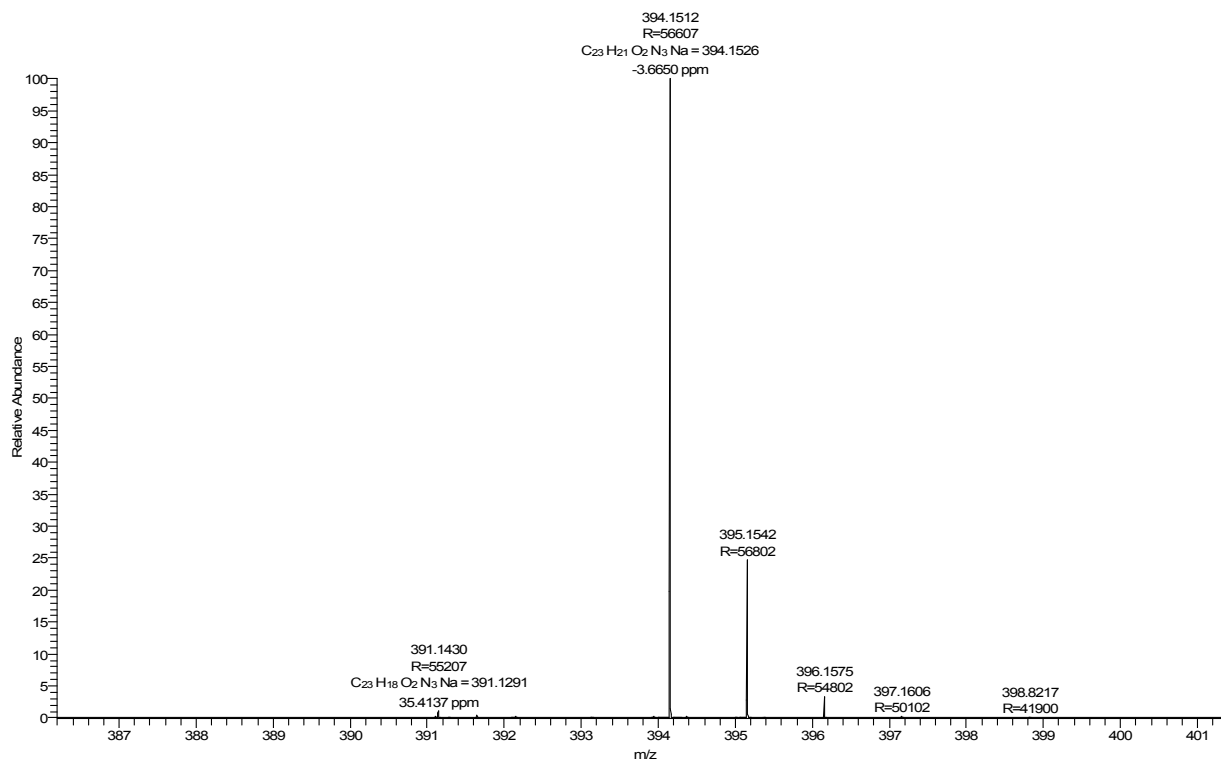

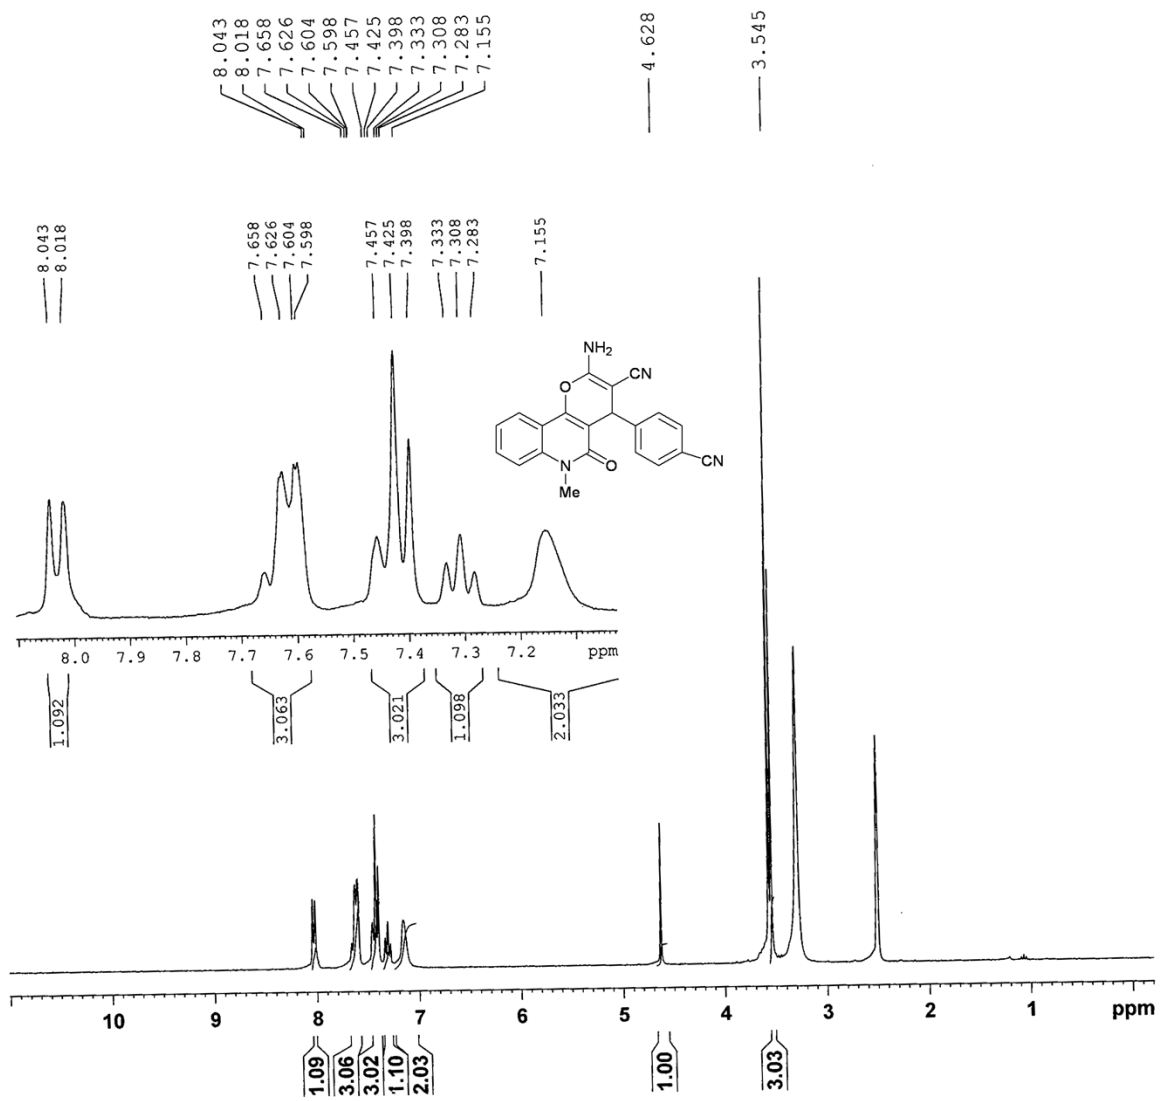

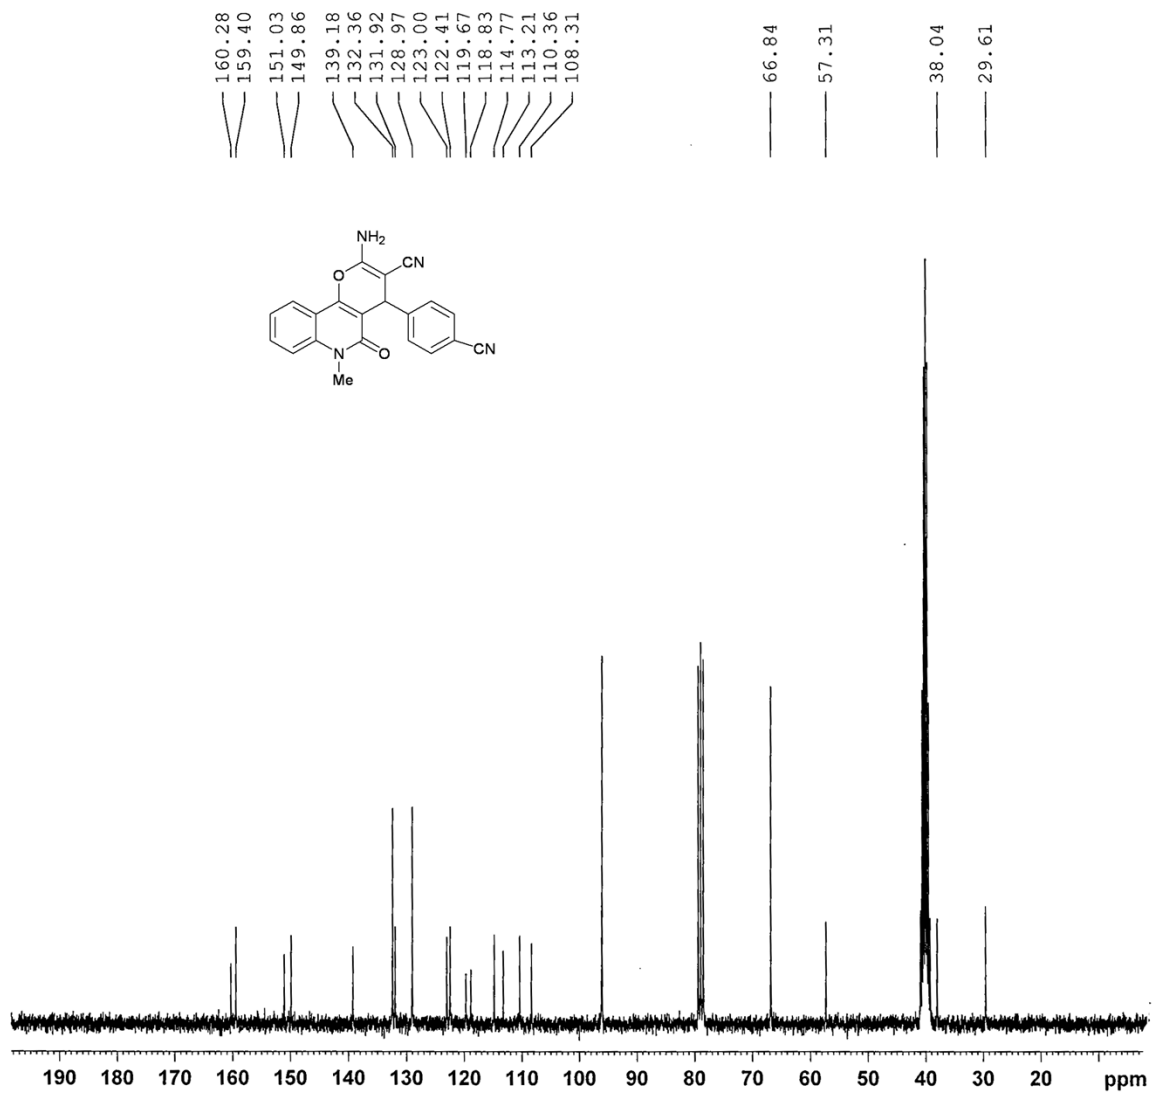

SA-C  
SA-C 98 (1.806) AM2 (Ar,20000,0.556,28.0,00,LS 1); Sm (SG, 1x1.00)

IISER PUNE

1: TOF MS ES+  
1.58e6

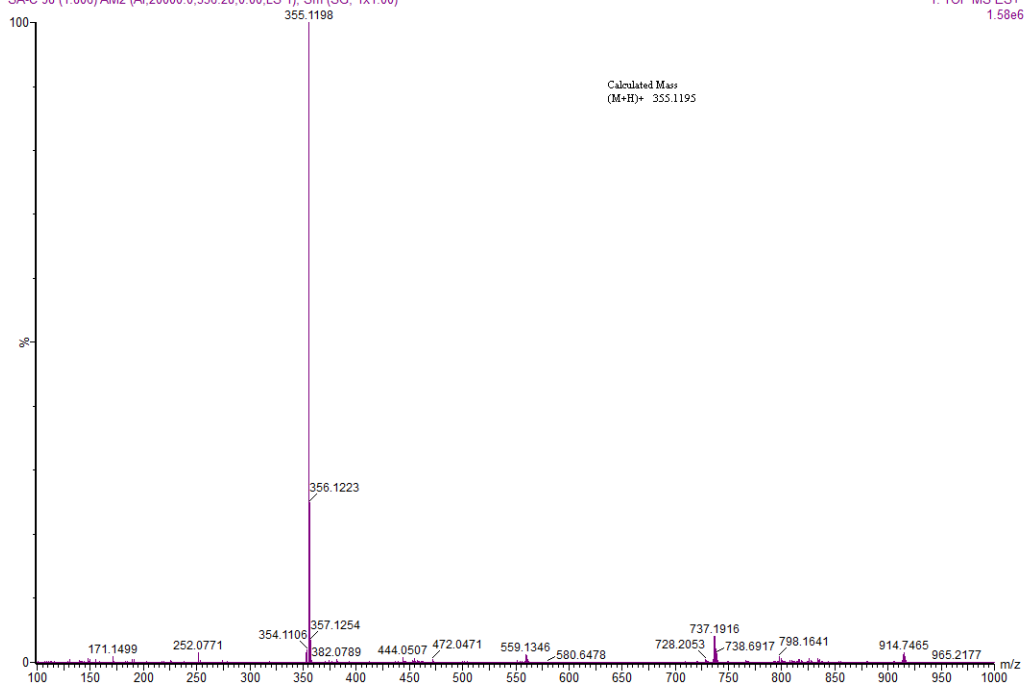

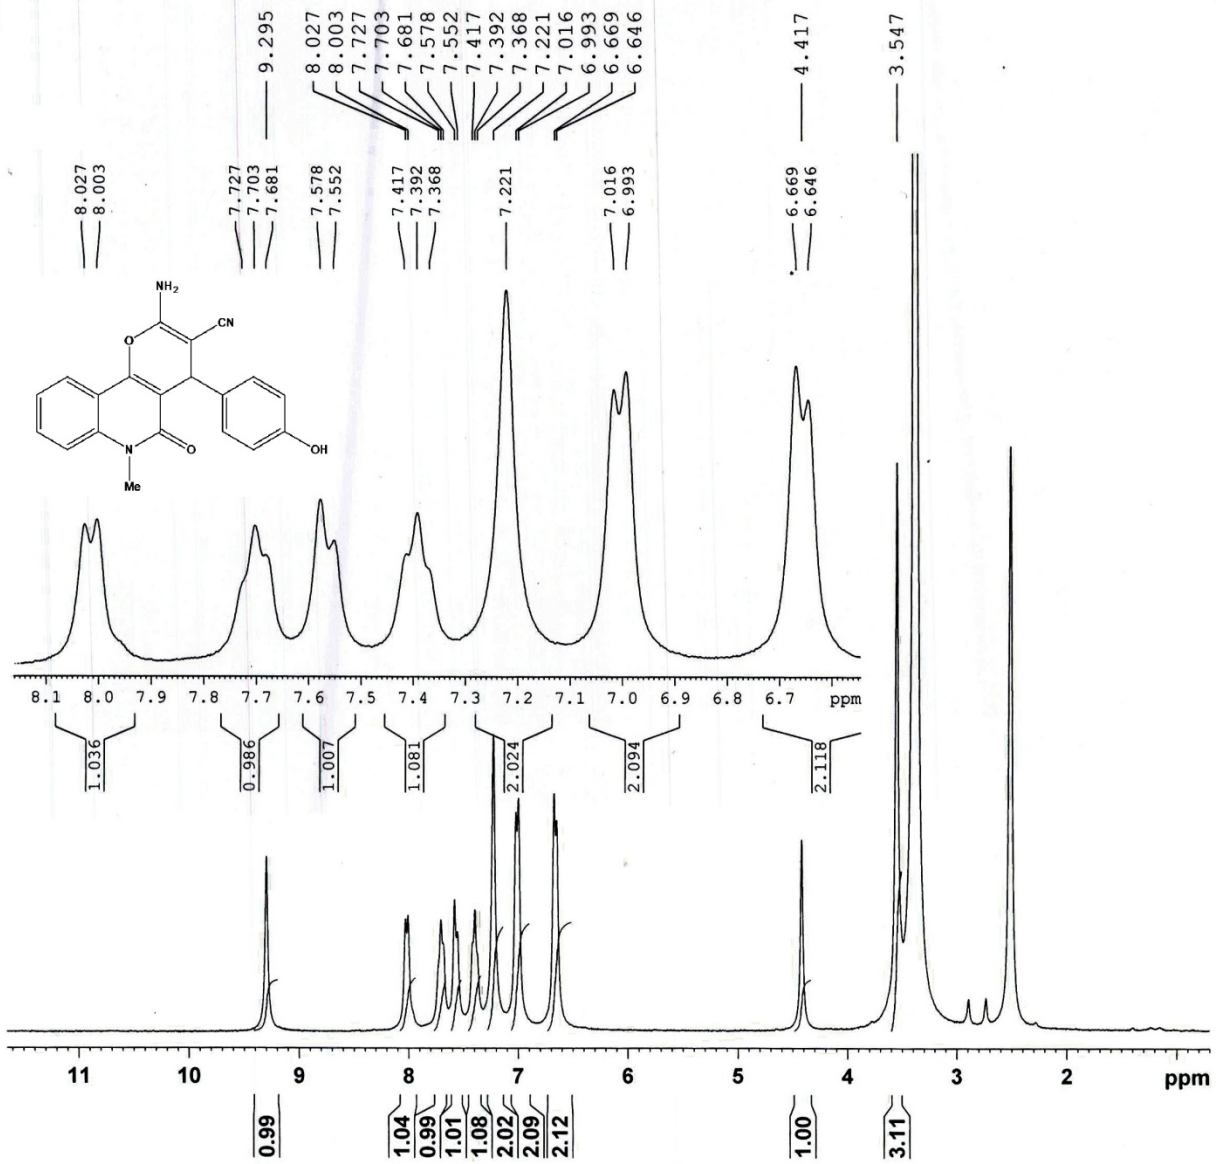

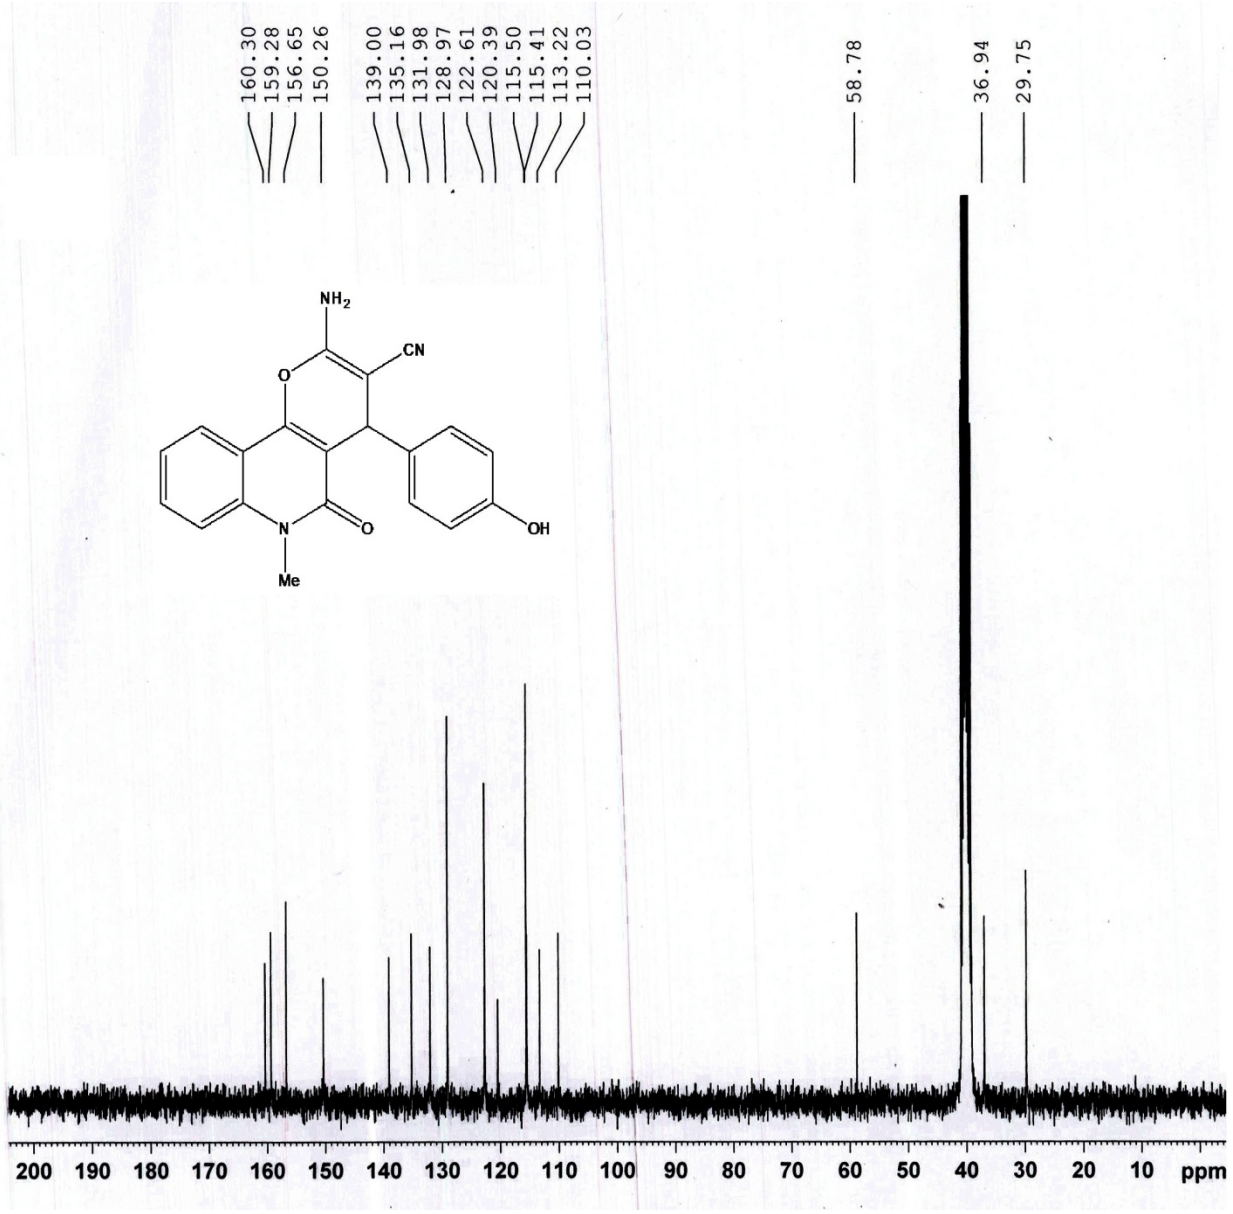



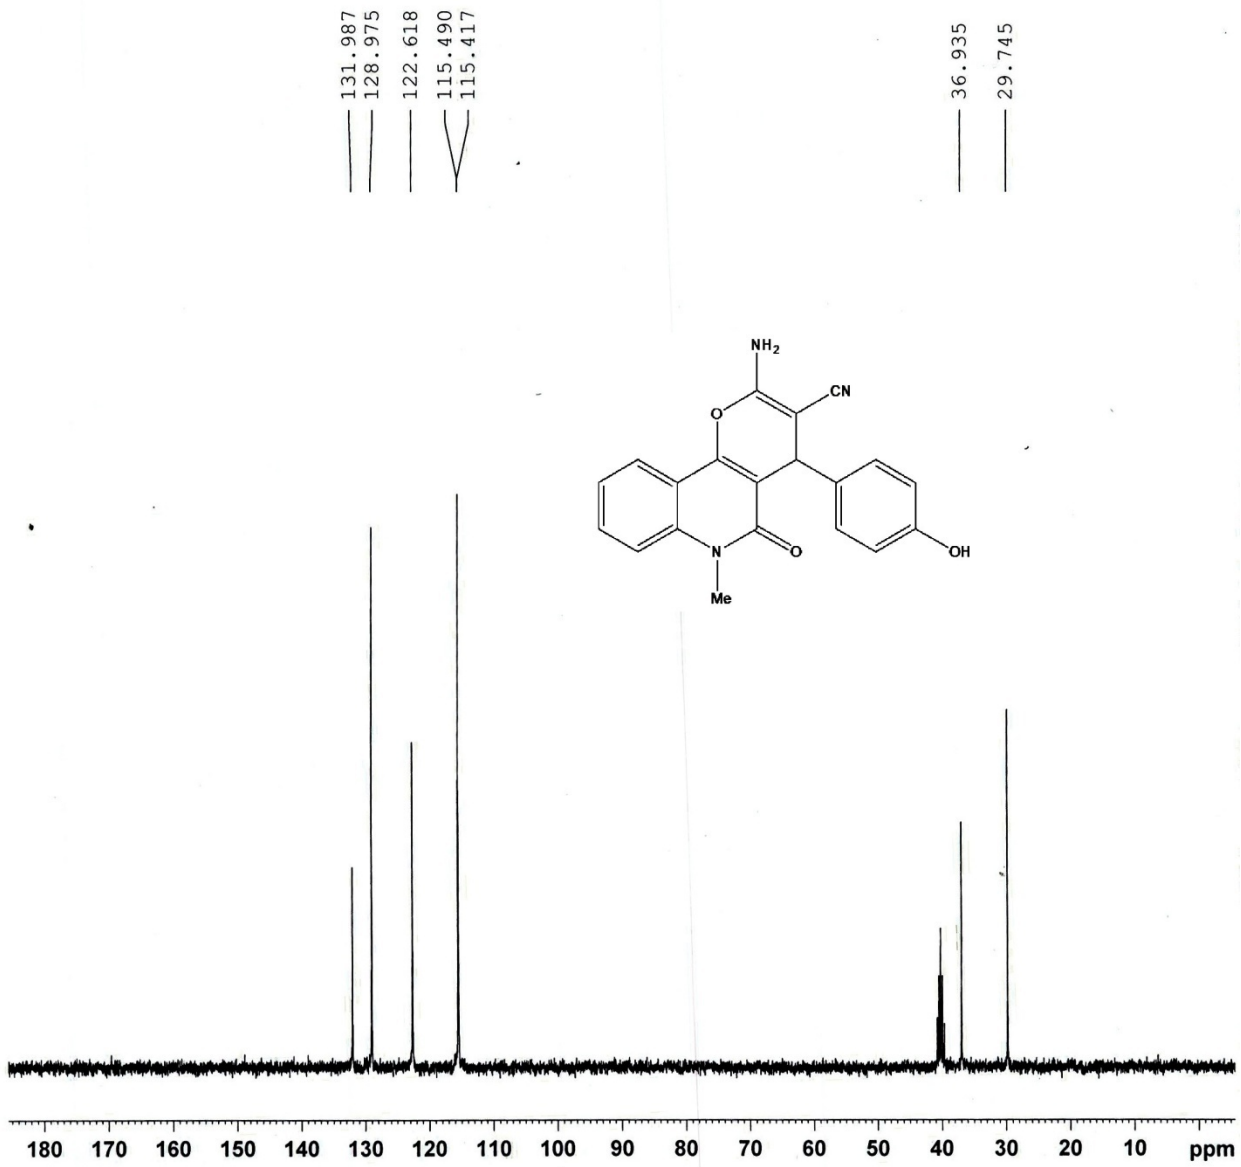

A-7\_141107161352 #851 RT: 3.79 AV: 1 NL: 1.10E8  
T: FTMS+p ESI Full ms [66.70-1000.00]

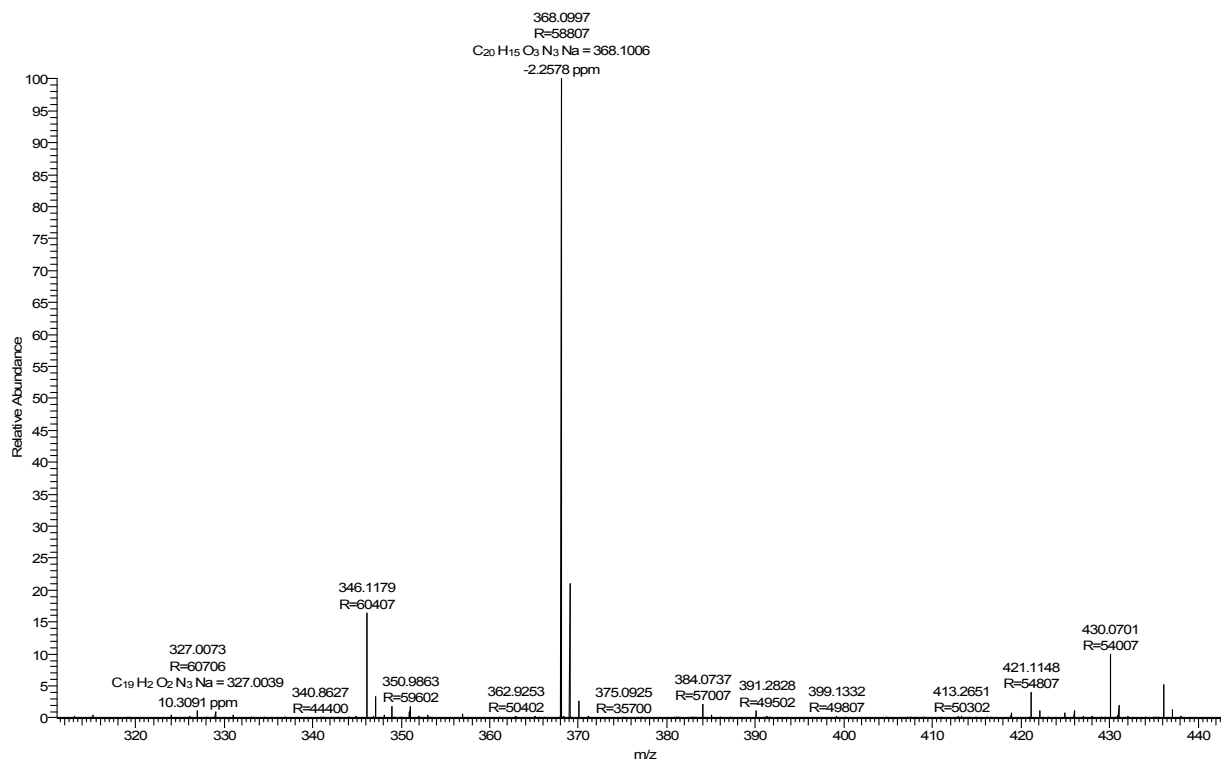

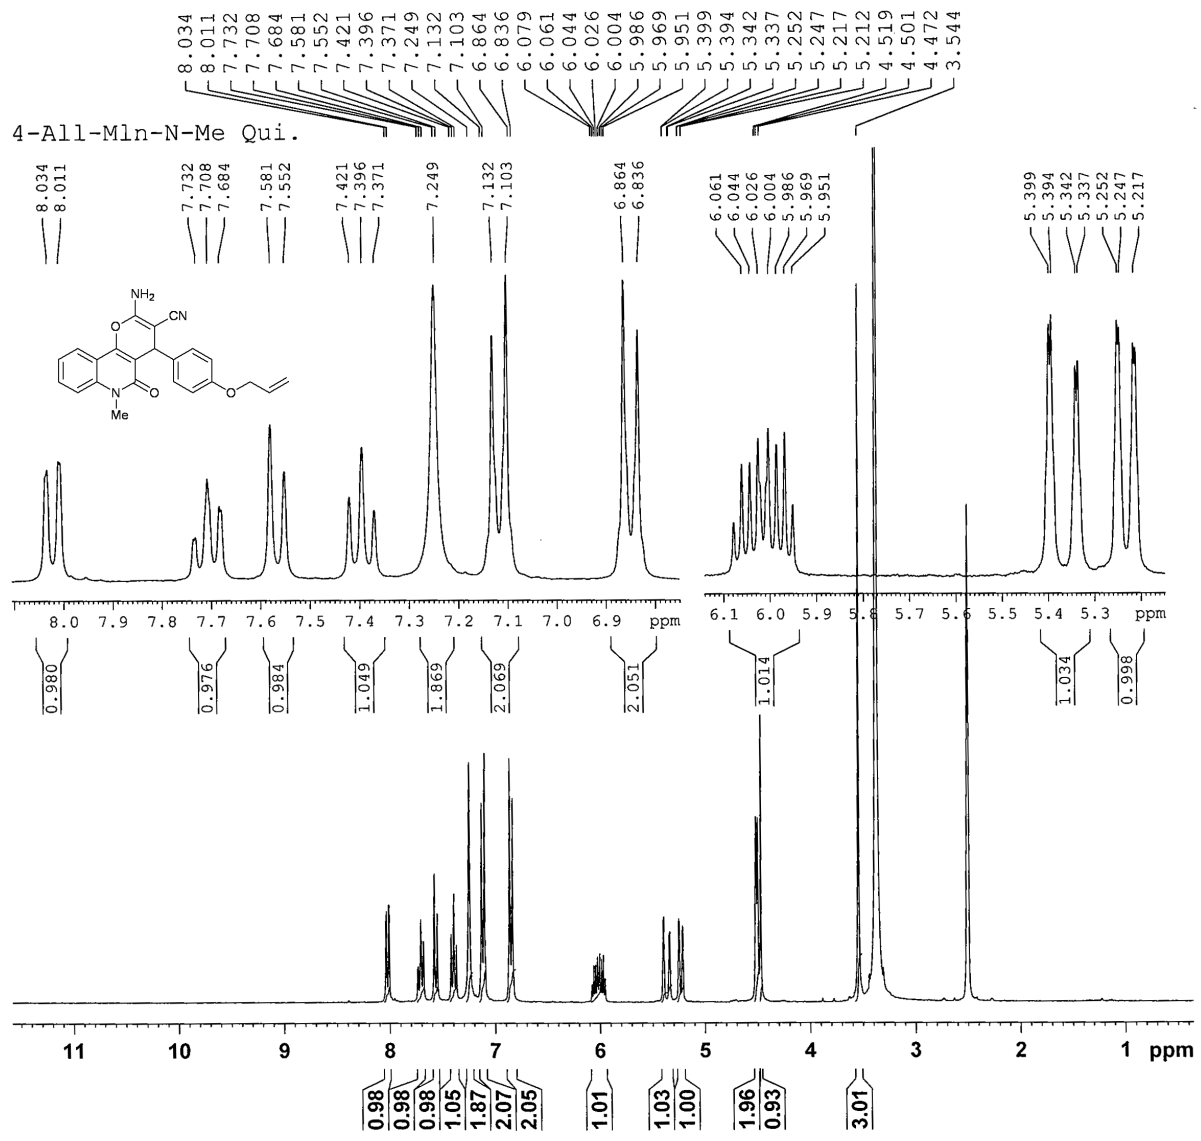

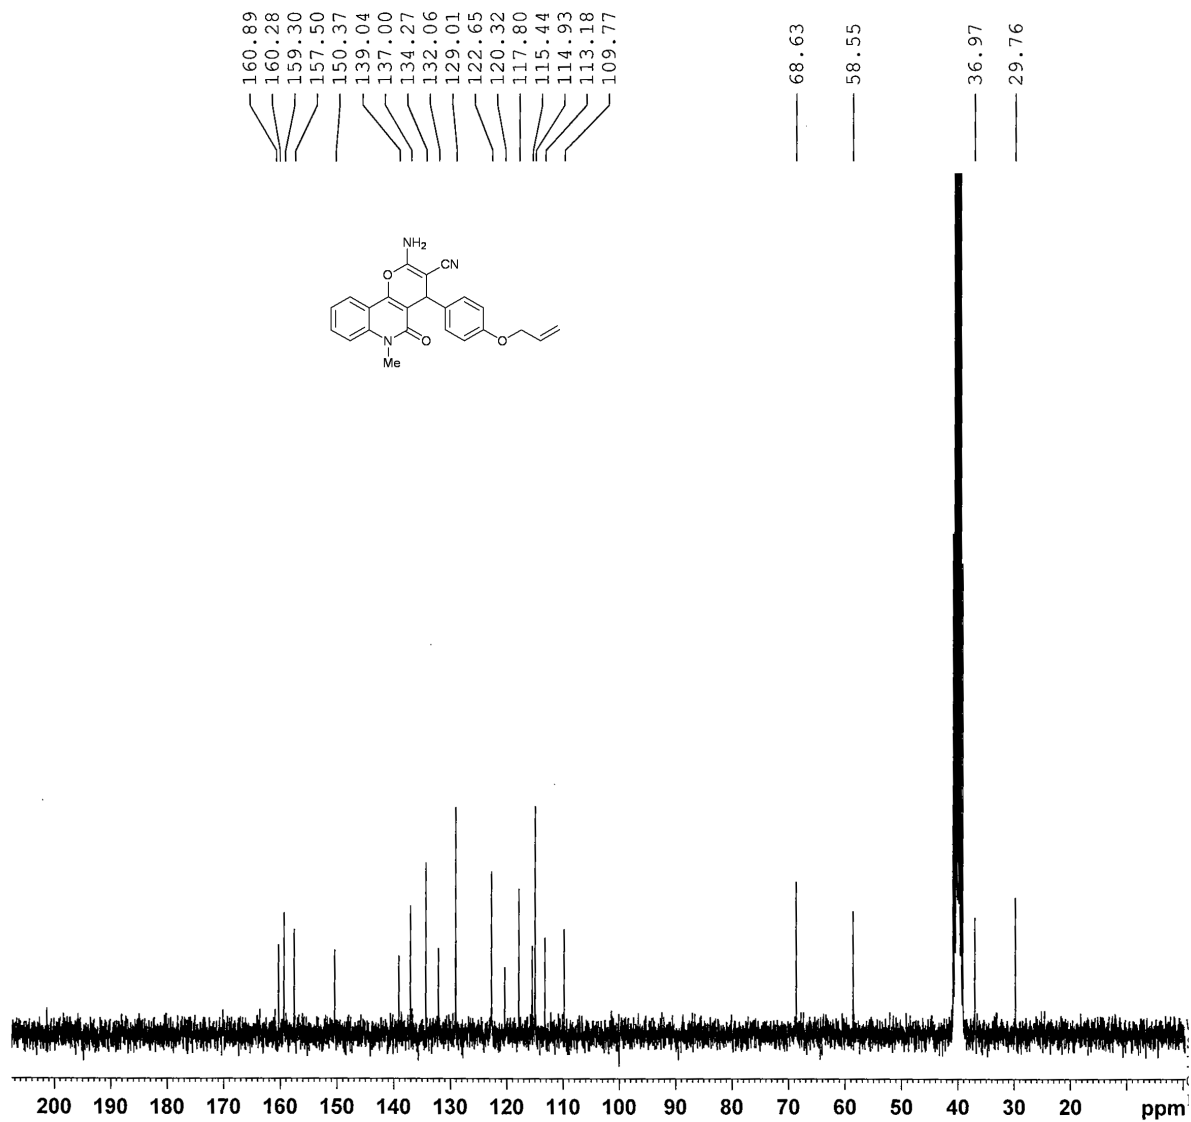

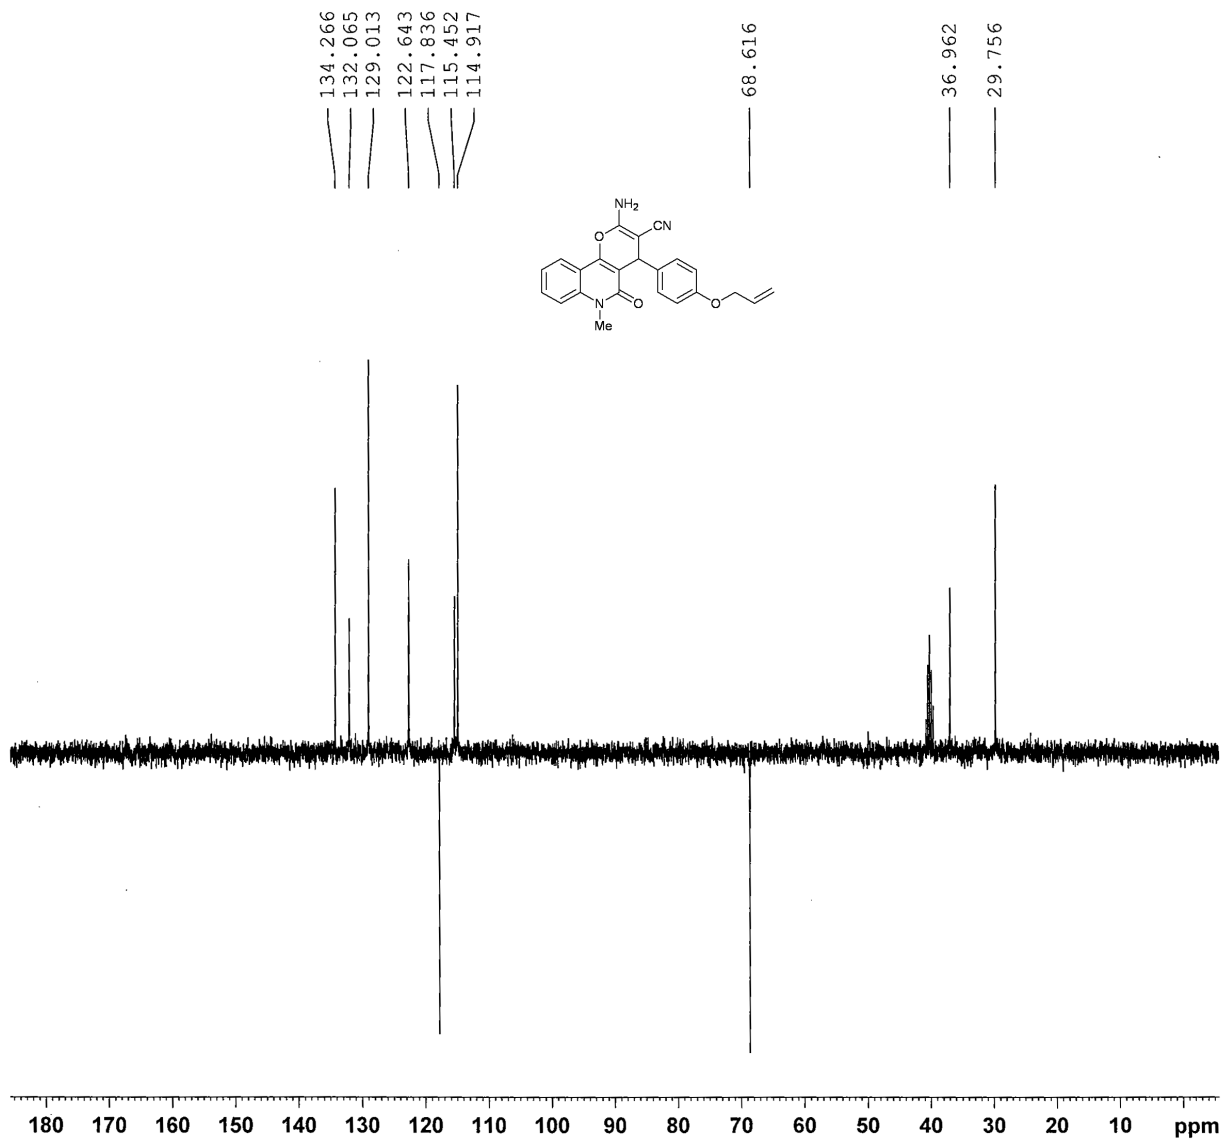

A-1\_141107150650 #881 RT: 3.93 AV: 1 NL: 9.35E5  
T: FTMS+p ESI Full ms [66.70-1000.00]

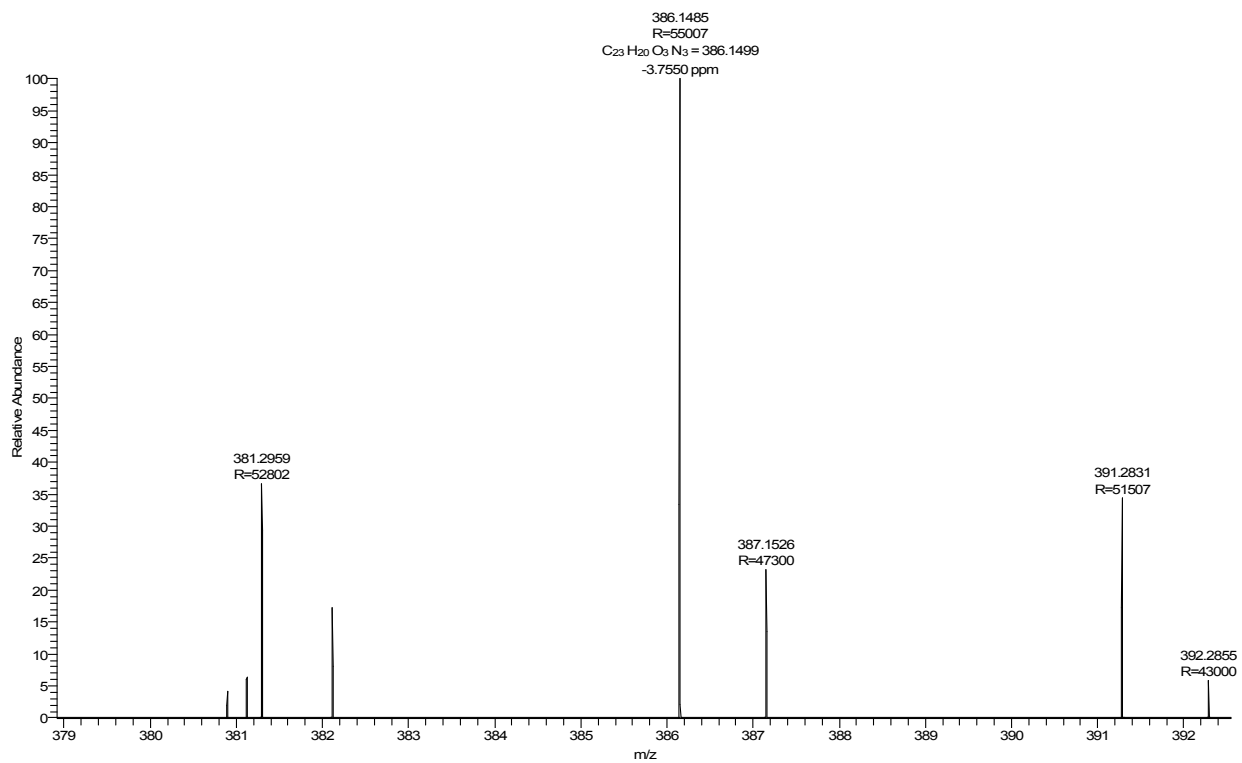

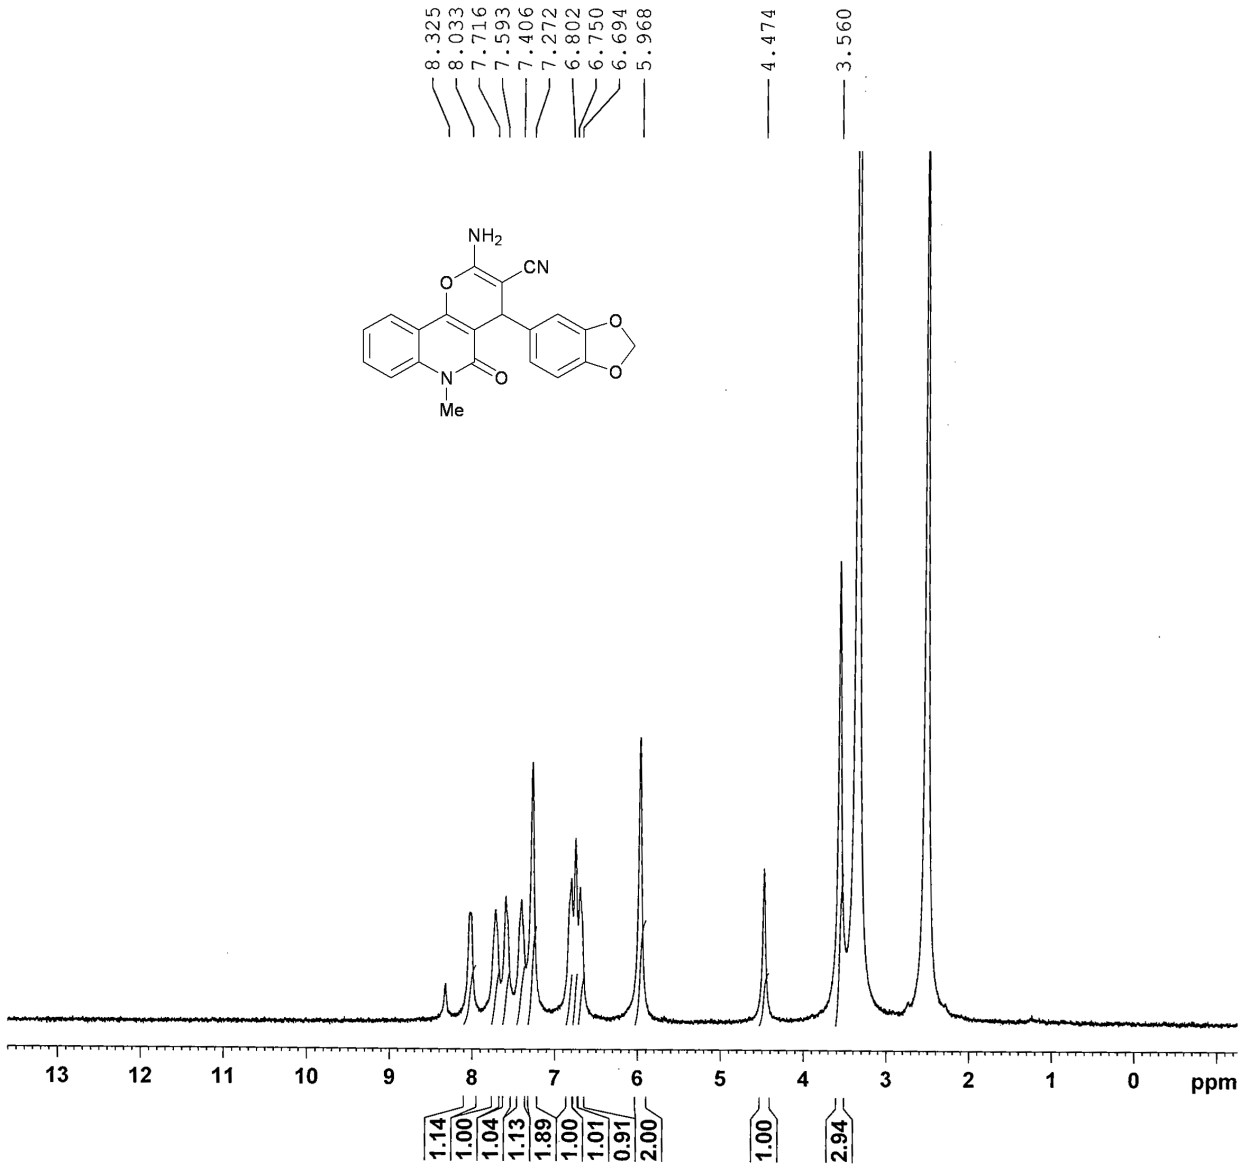

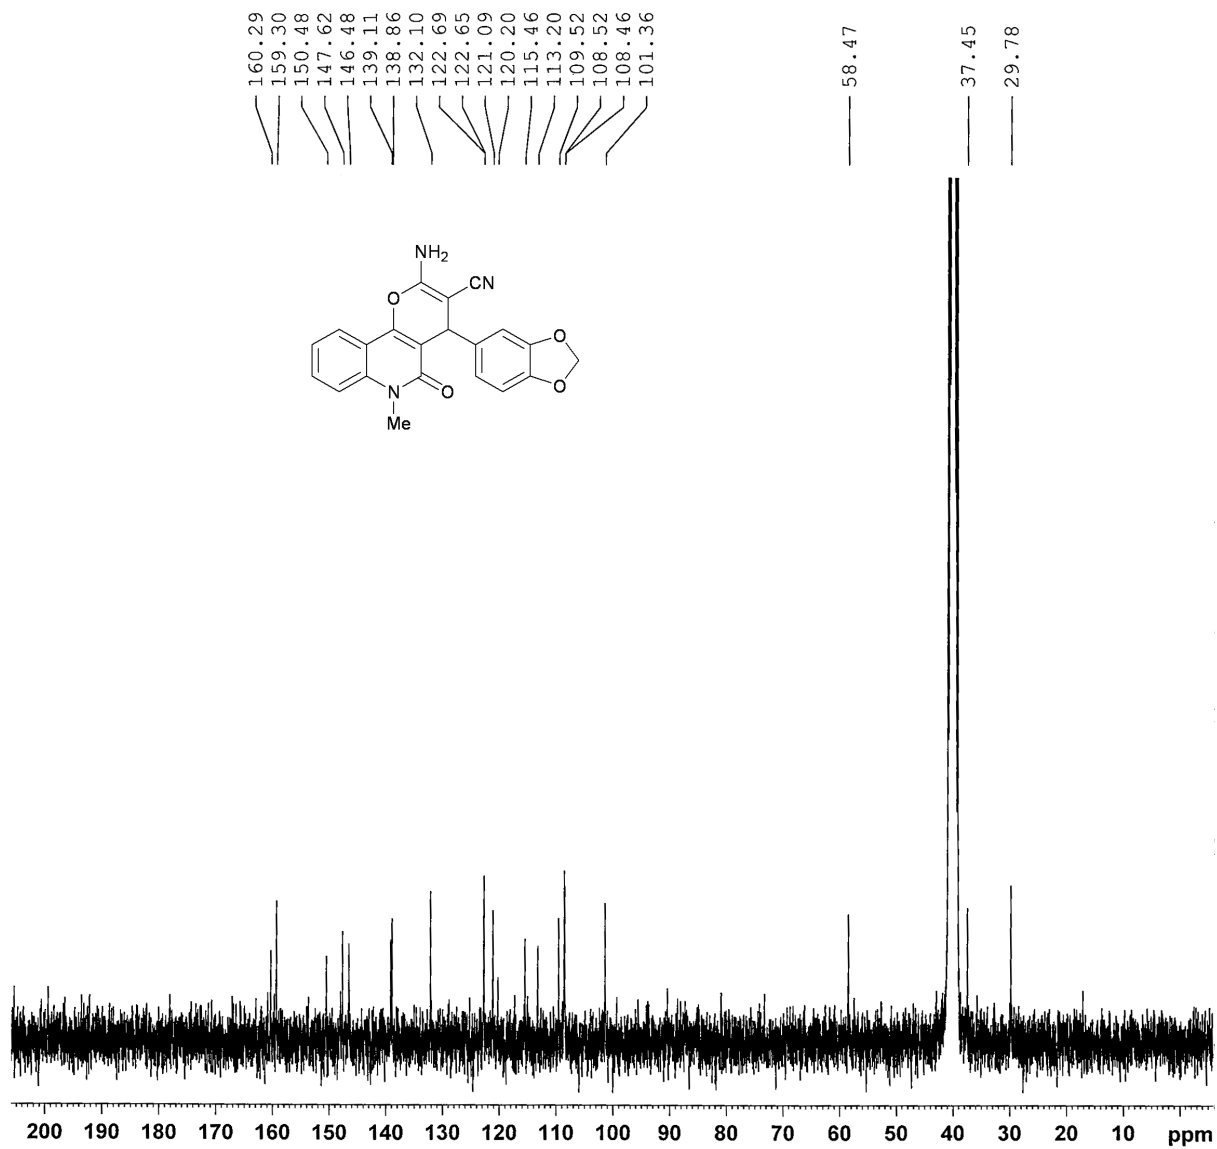



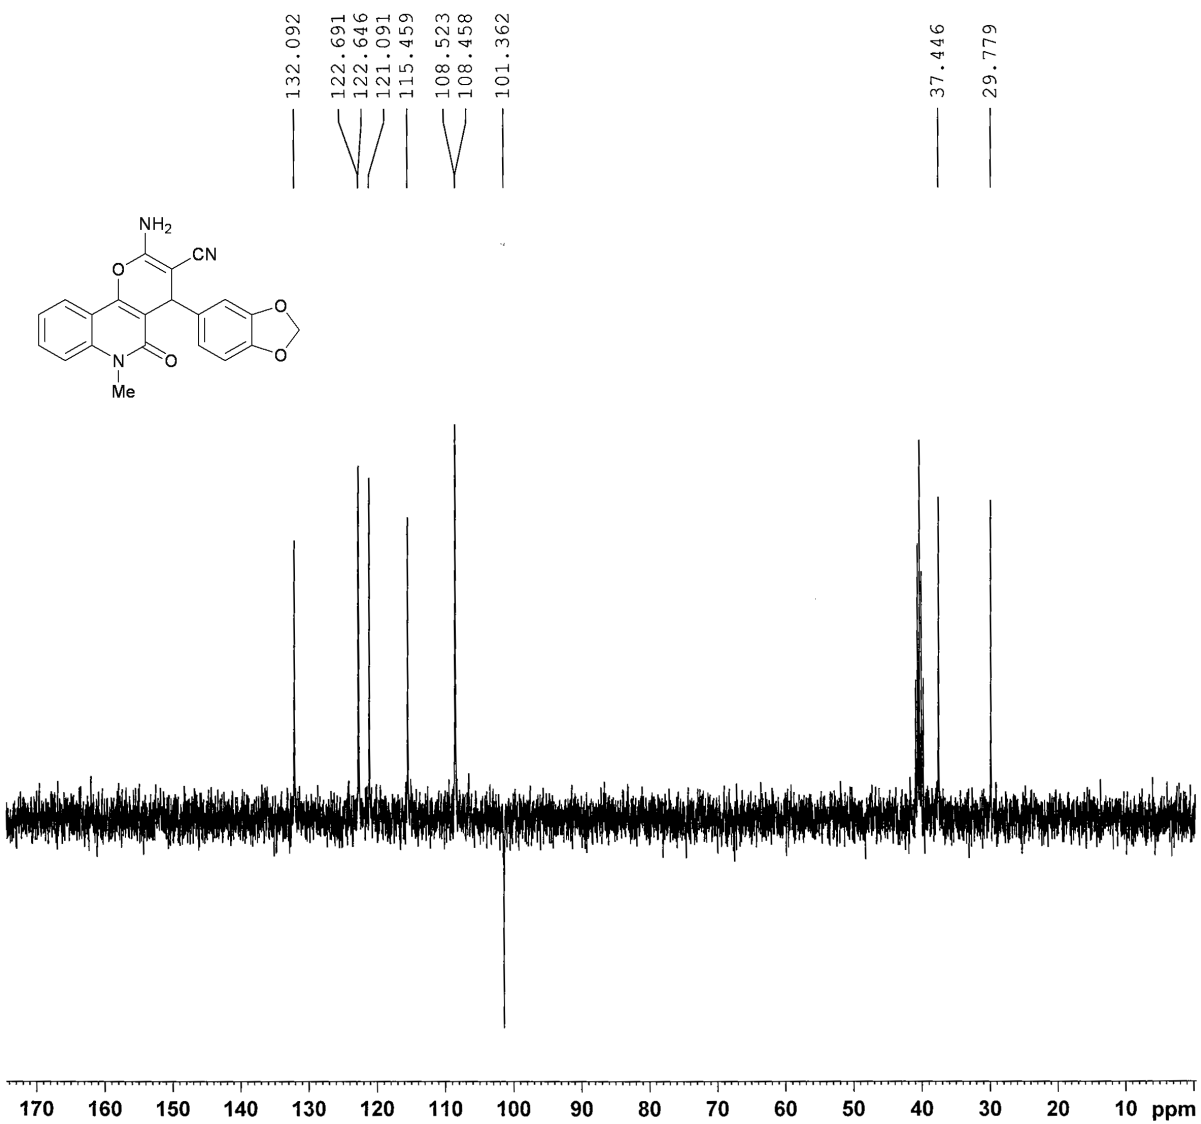

A6\_141107160242 #889 RT: 3.96 AV: 1 NL: 2.10E8  
T: FTMS + p ESI Full ms [66.70-1000.00]

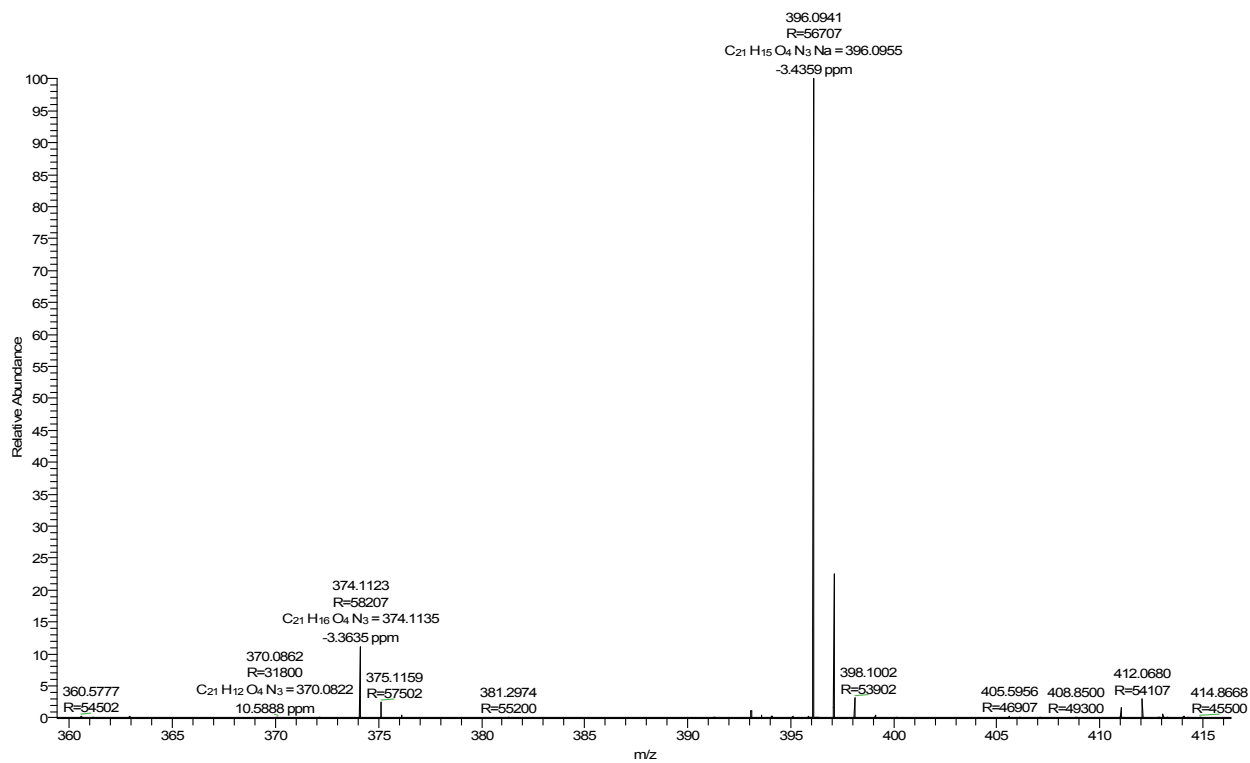

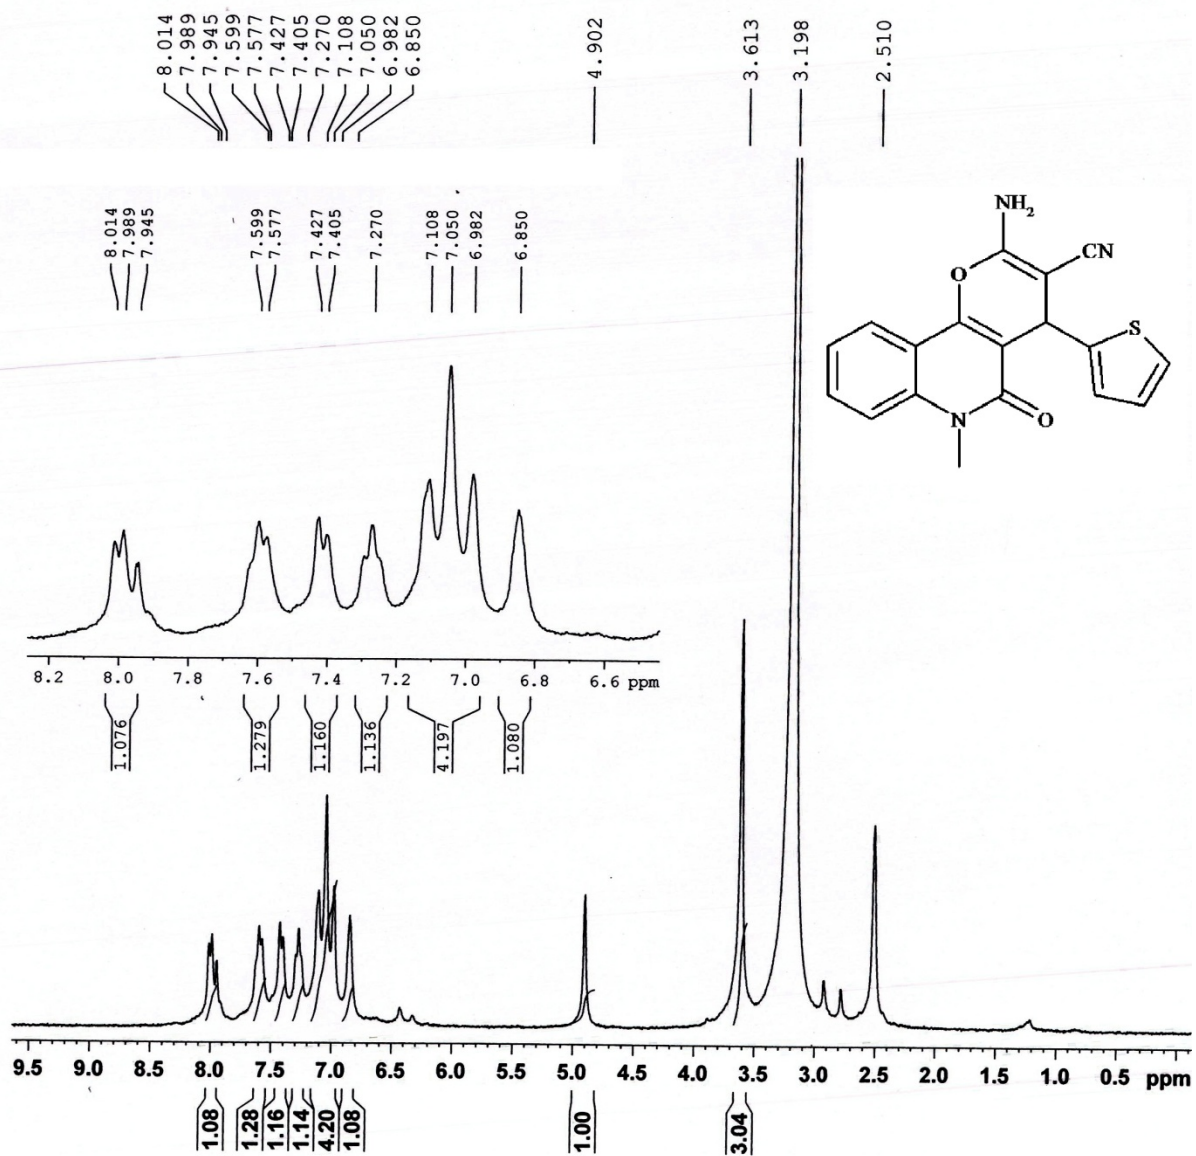

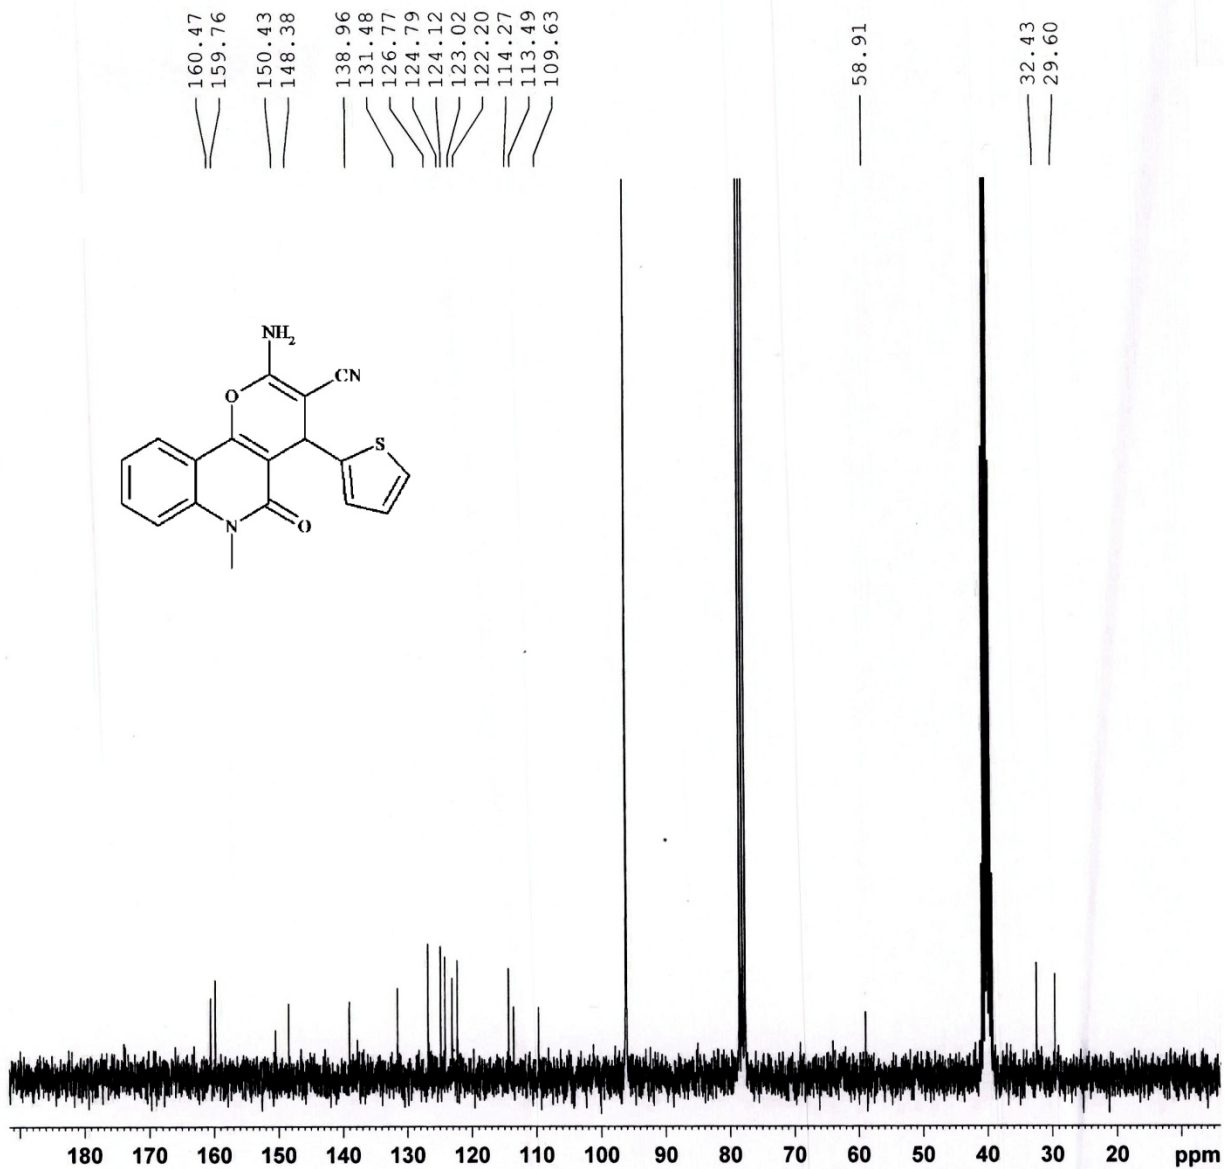

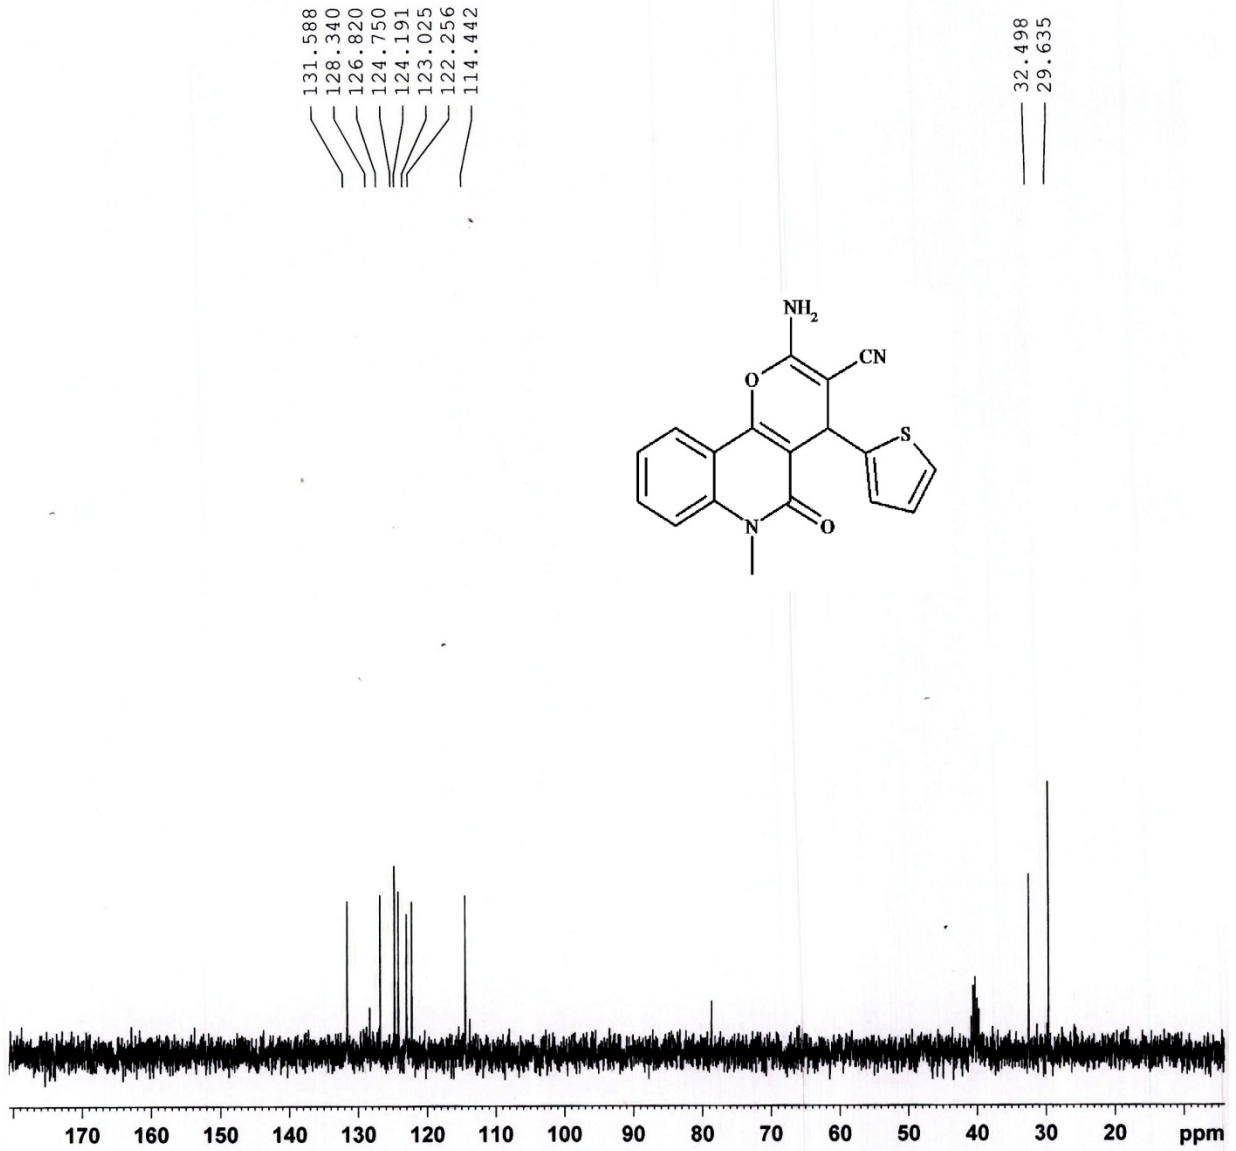

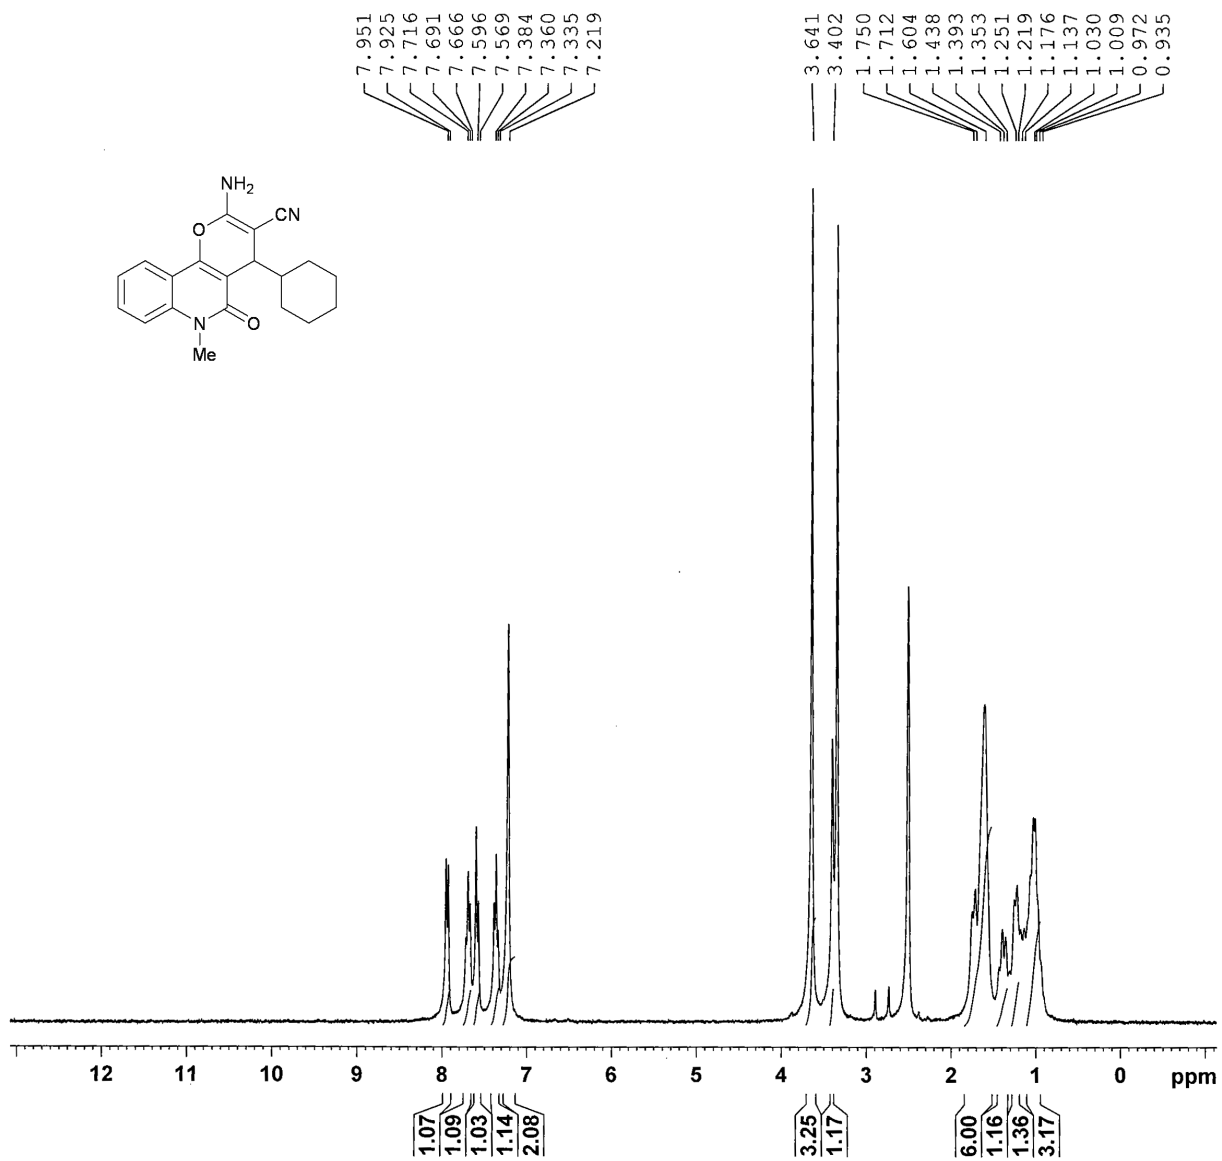

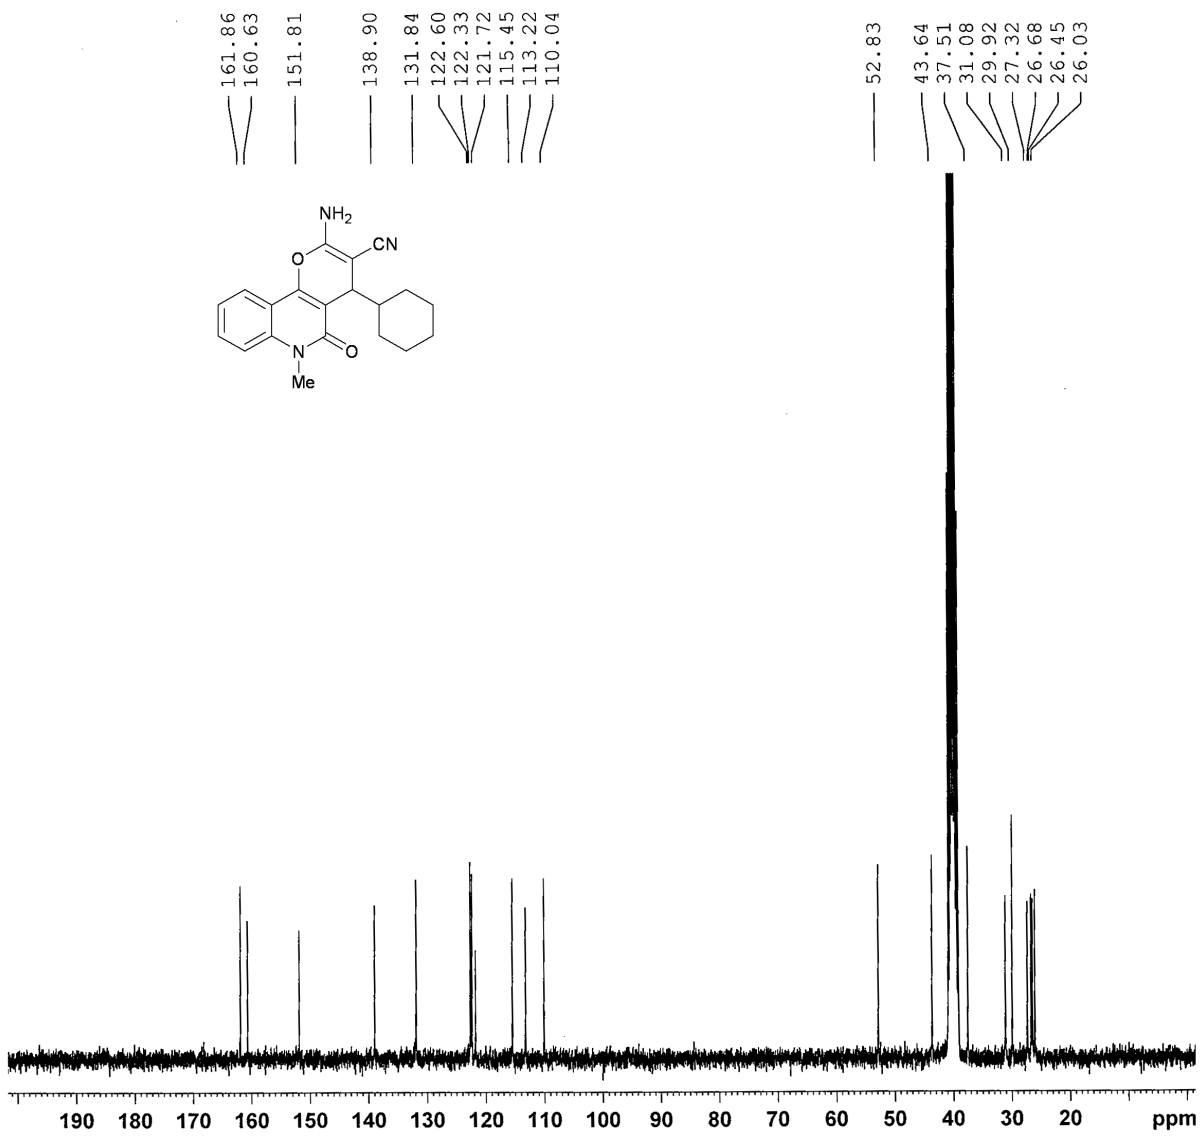

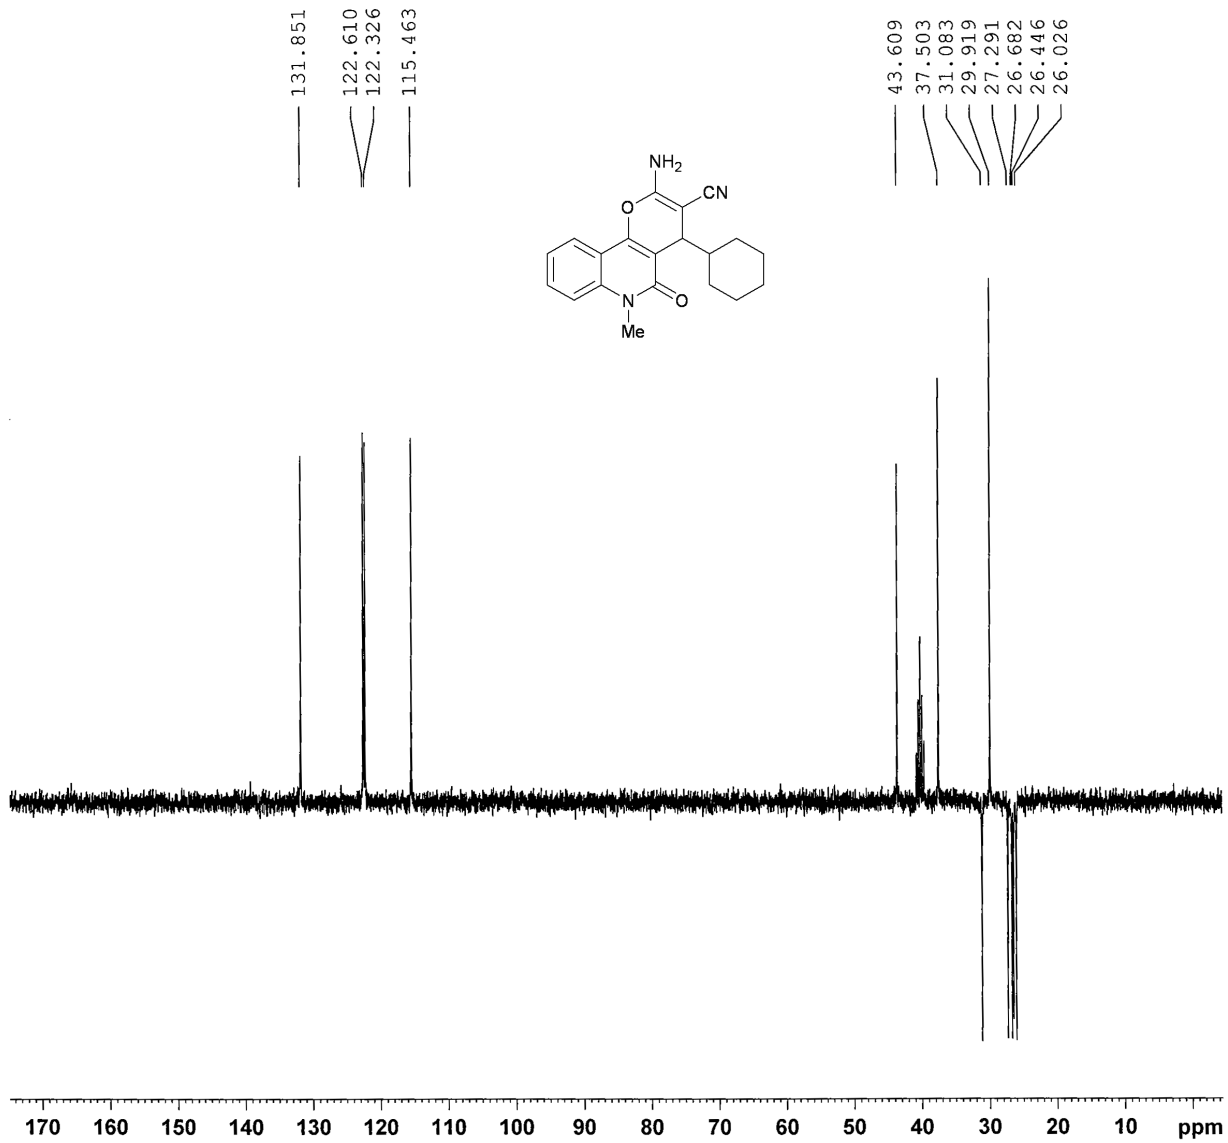



C-7\_141204110926 #944 RT: 4.20 AV: 1 NL: 1.41E9  
T: FTMS+p ESI Full ms [66.70-1000.00]

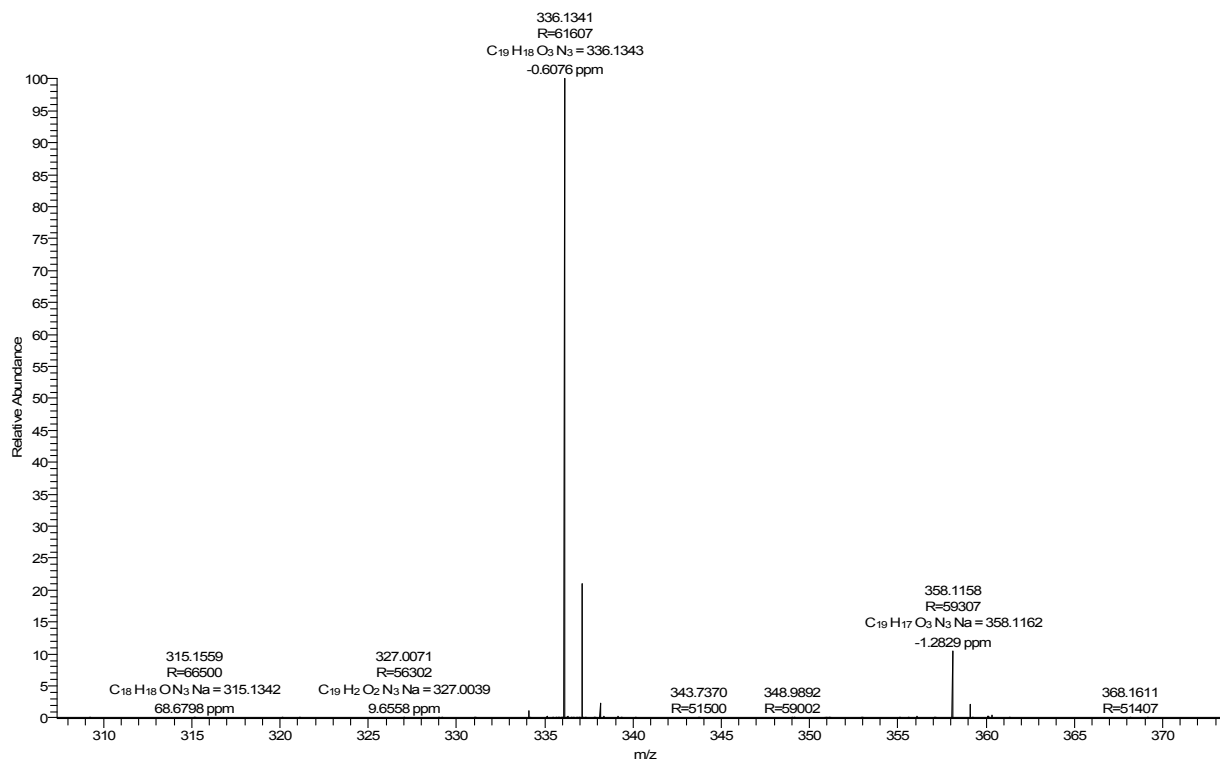

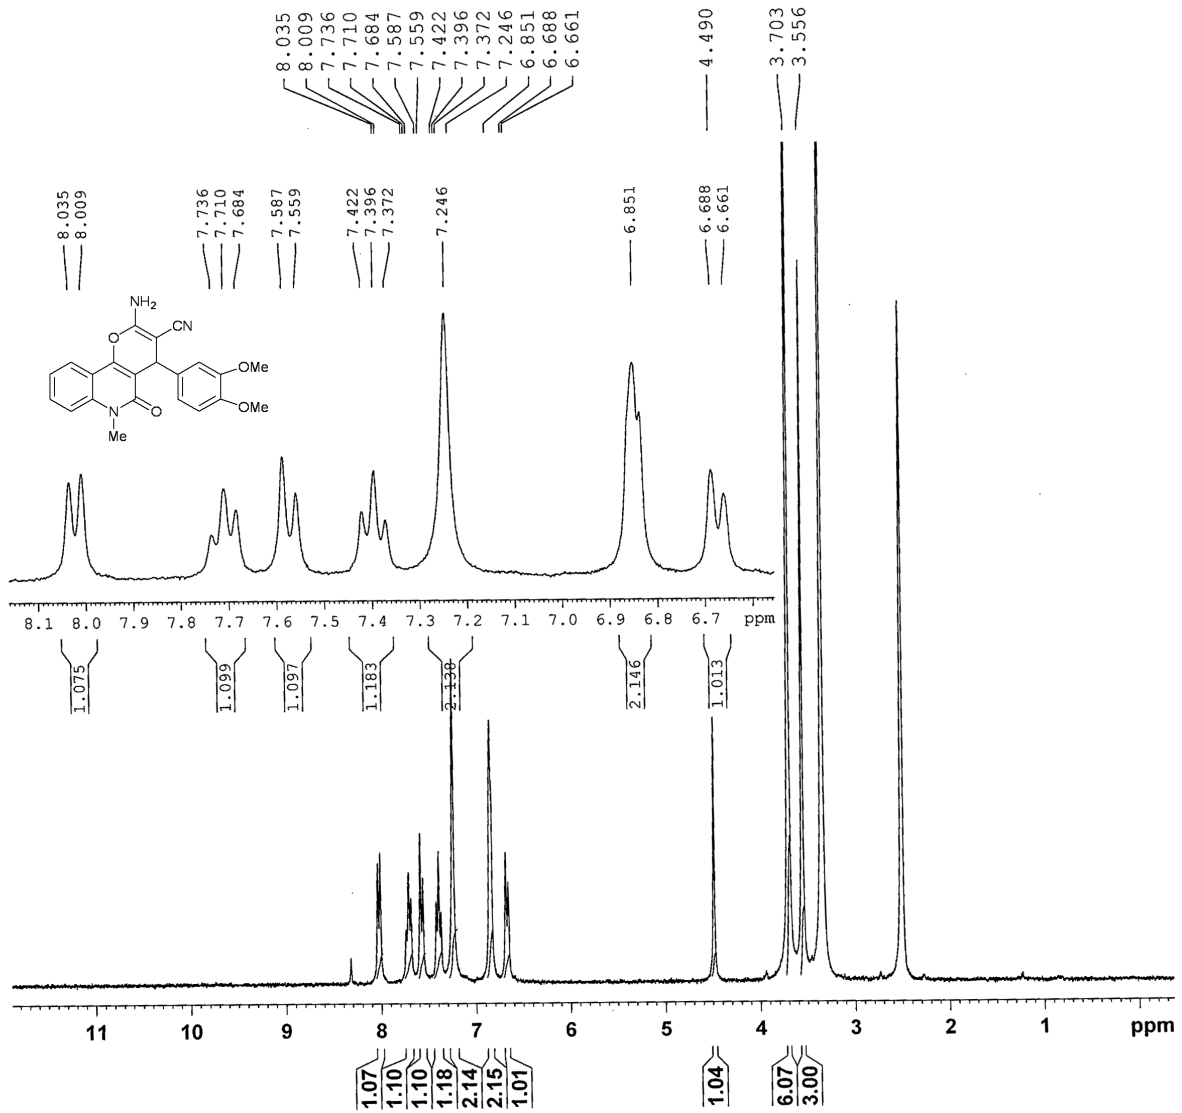

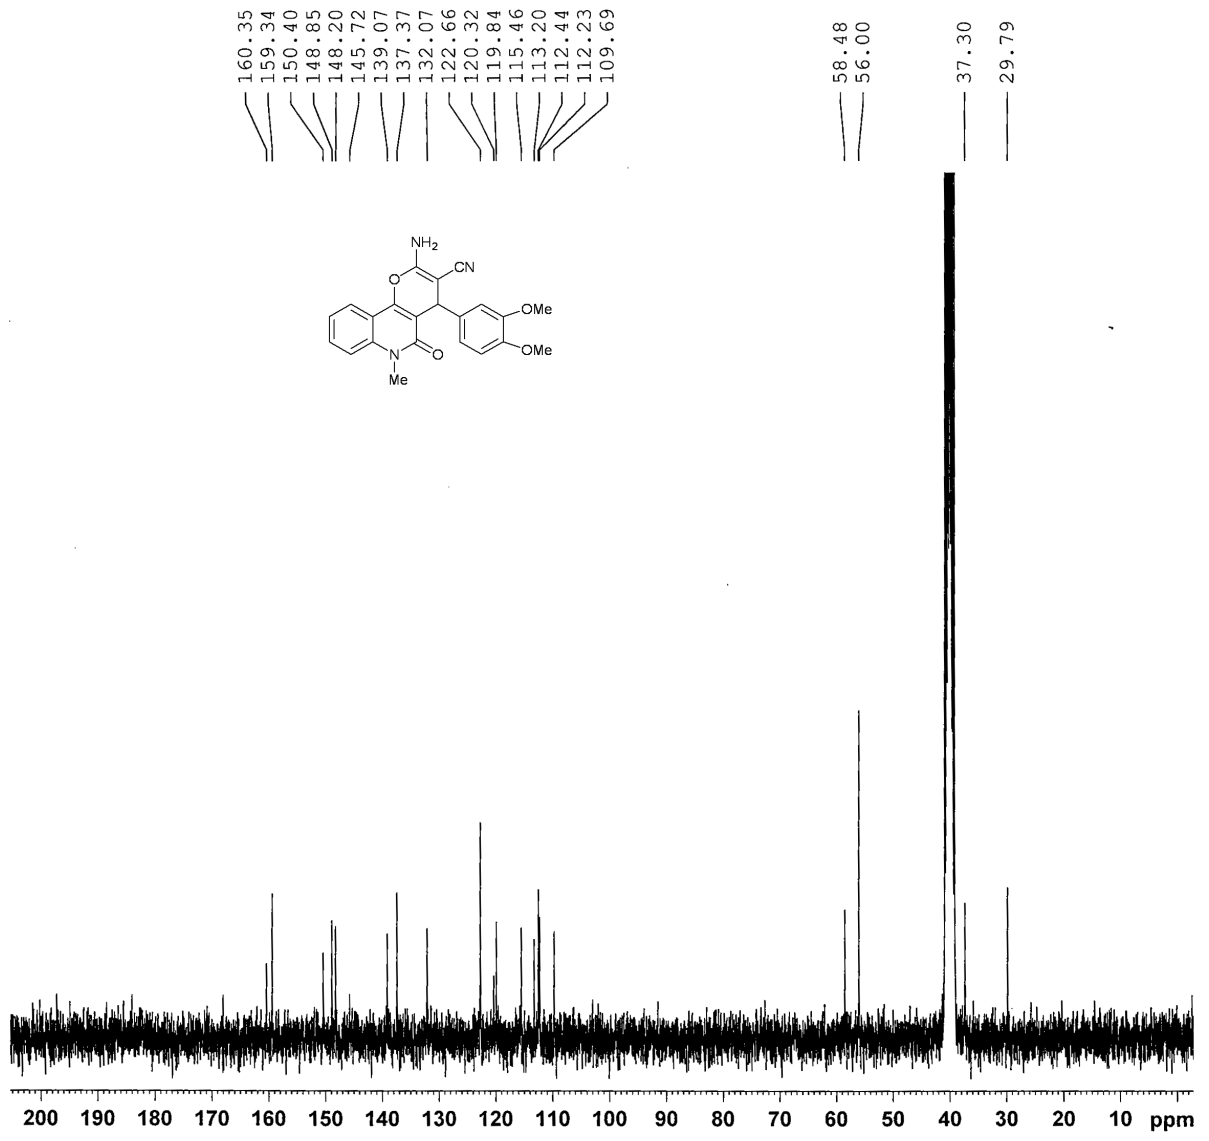

A-3\_141107152912 #869 RT: 3.87 AV: 1 NL: 1.93E8  
T: FTMS+p ESI Full ms [66.70-1000.00]

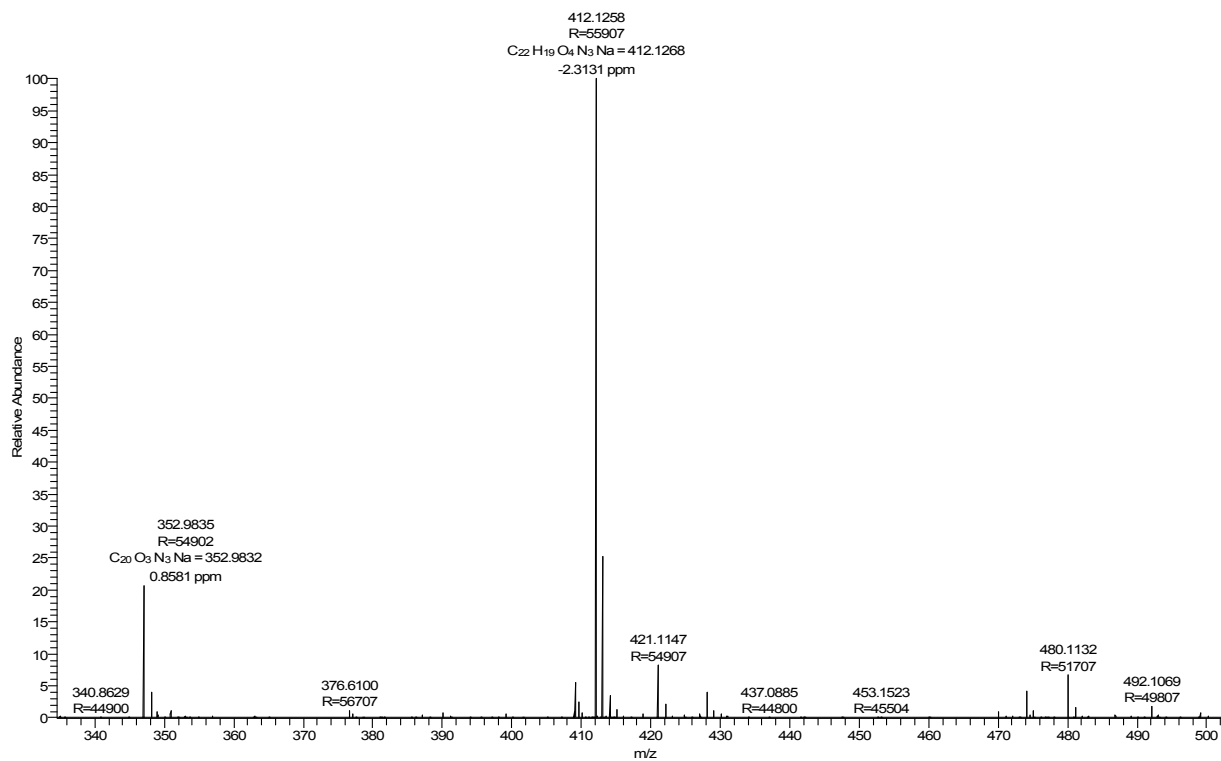

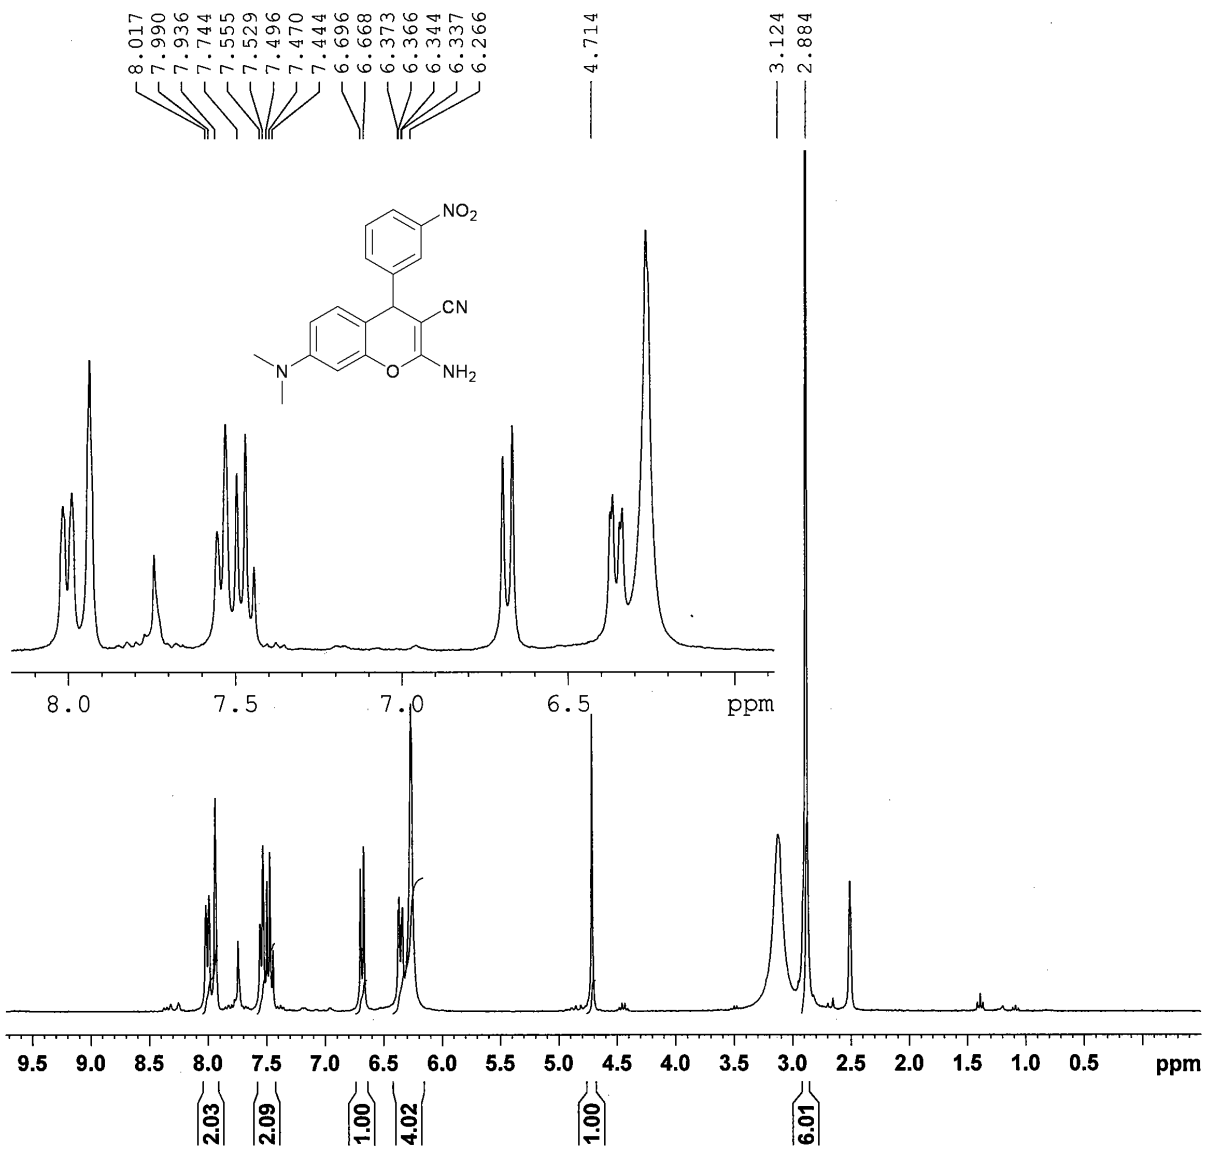

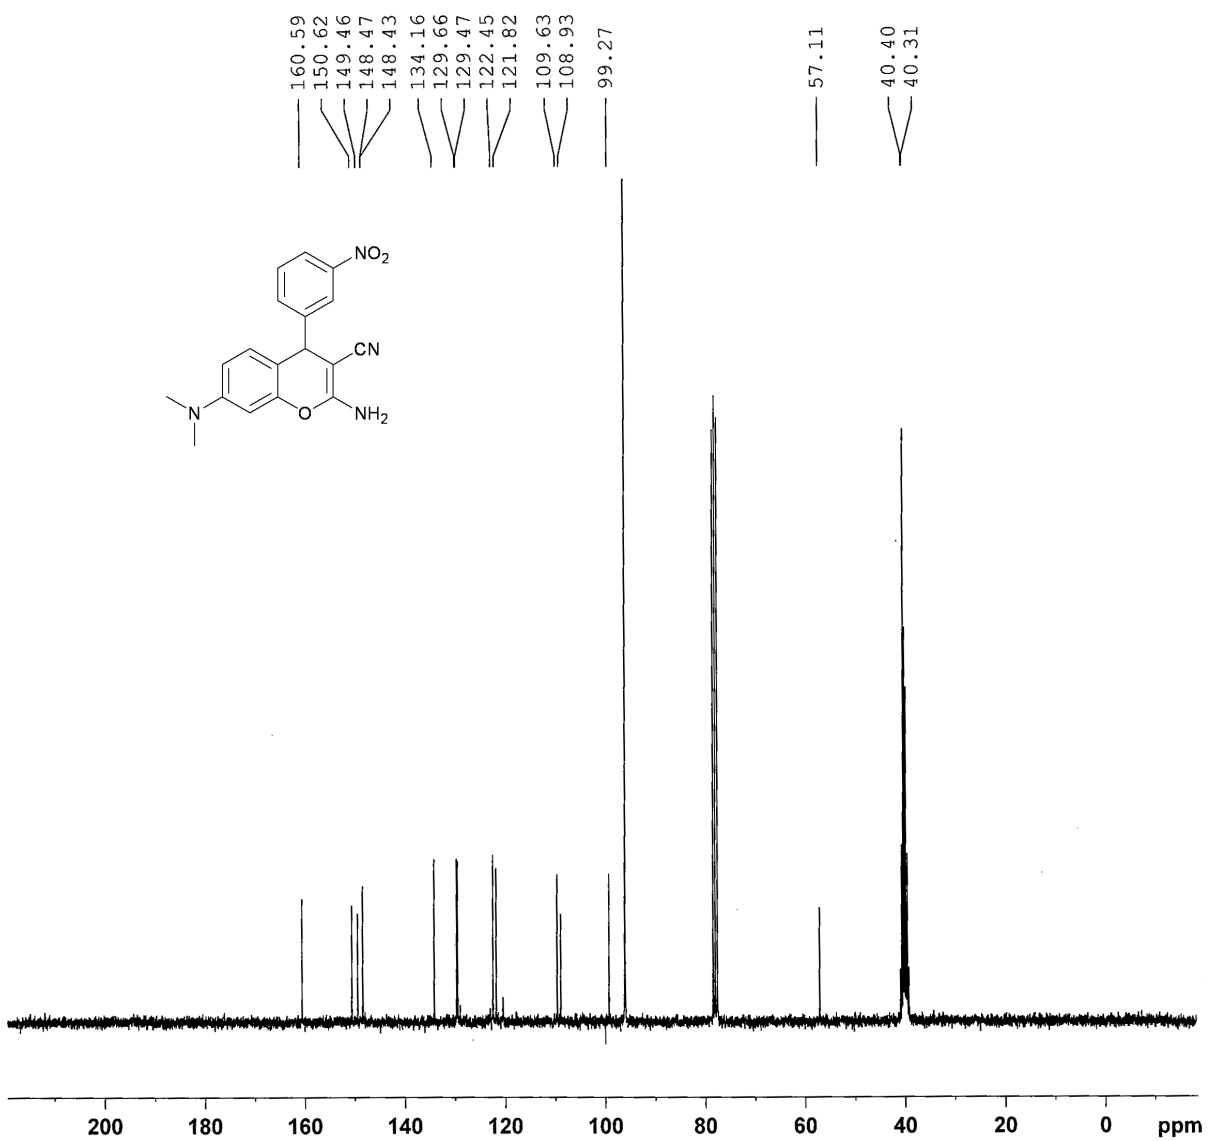

134.179  
129.667  
129.479  
122.451  
121.824  
109.619  
99.266

40.386  
40.323

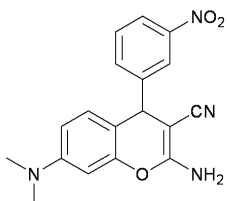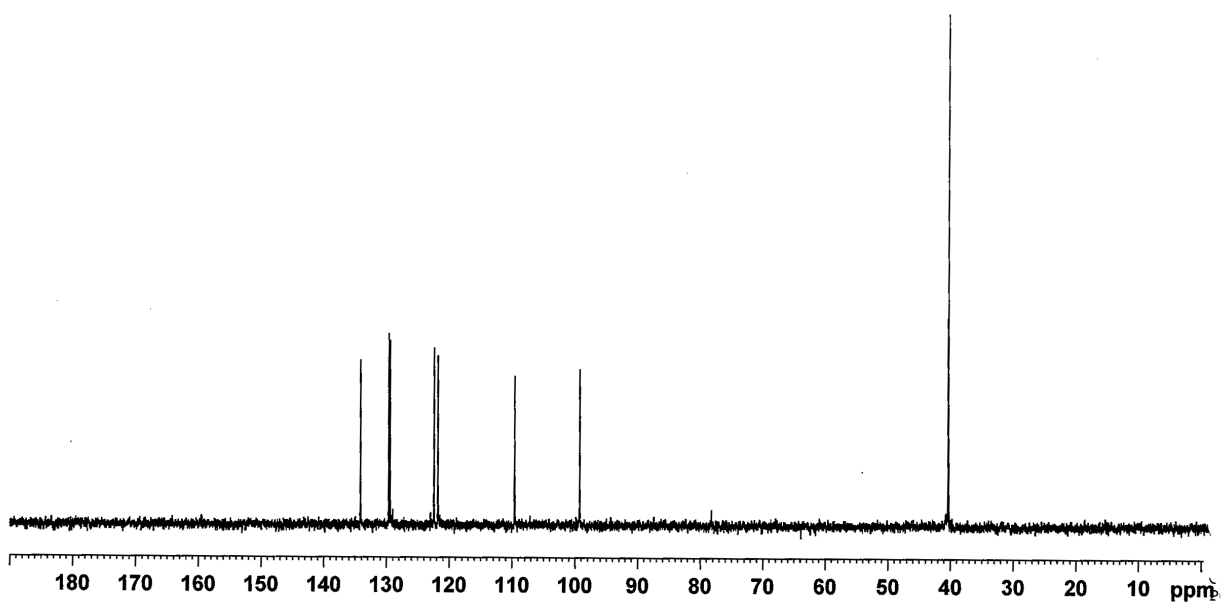

C-1\_141202170637 #899 RT: 4.01 AV: 1 NL: 7.36E7  
T: FTMS+p ESI Full ms [66.70-1000.00]

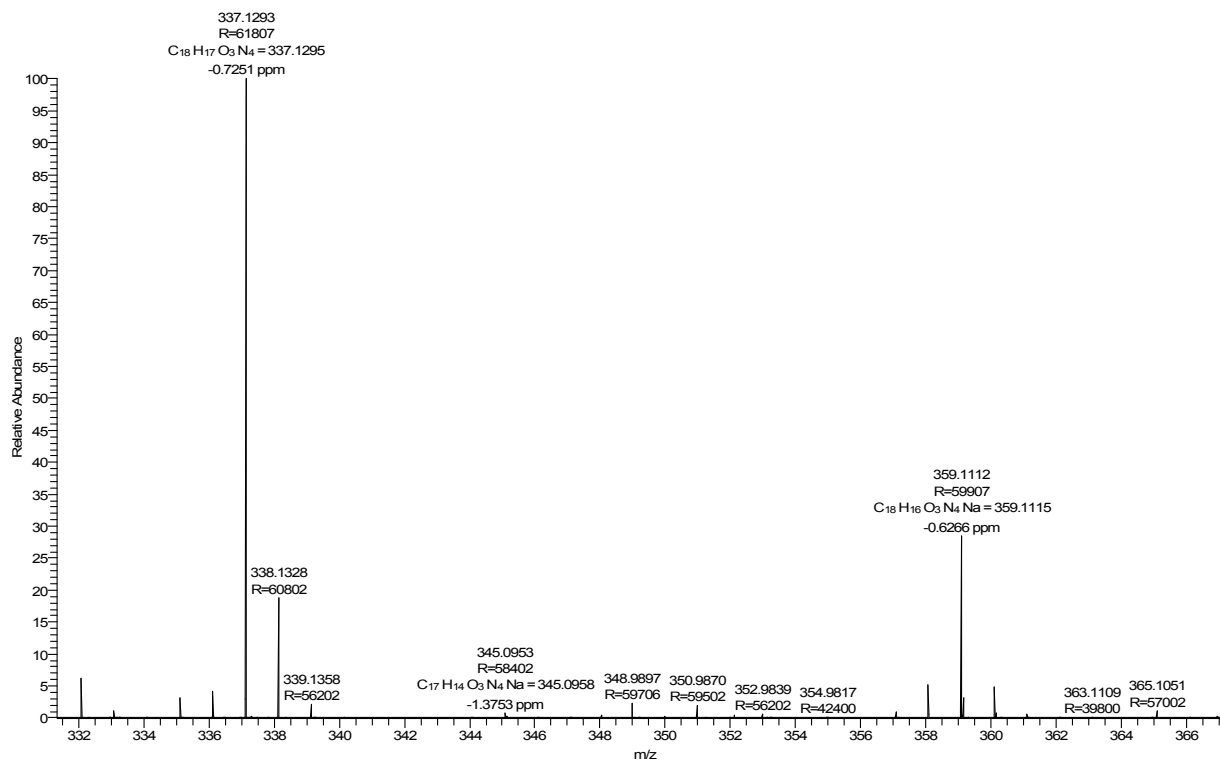



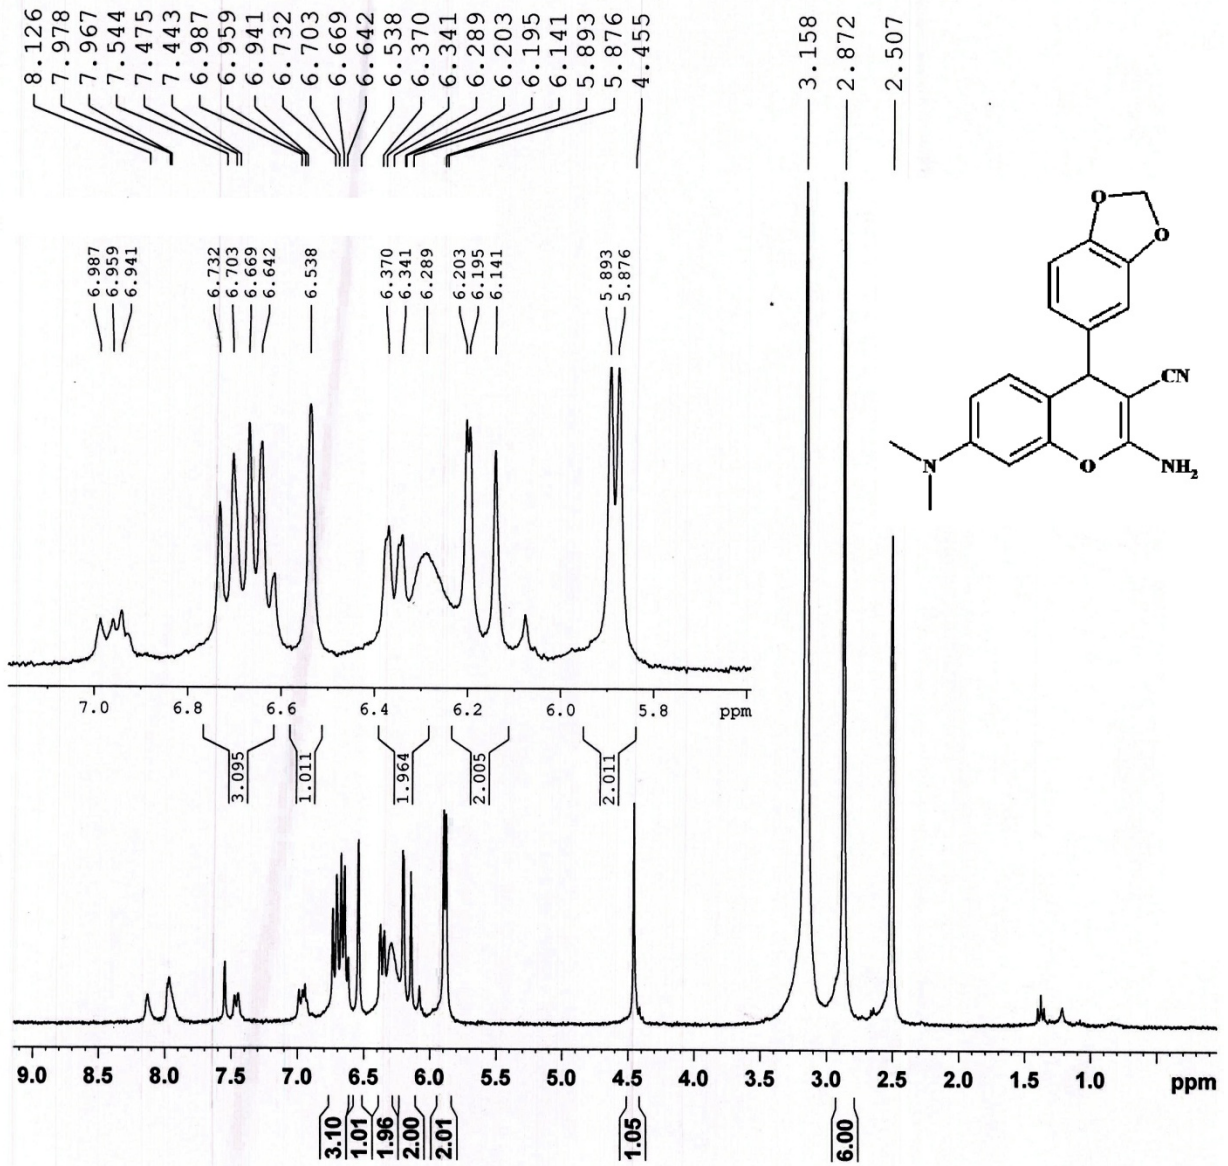

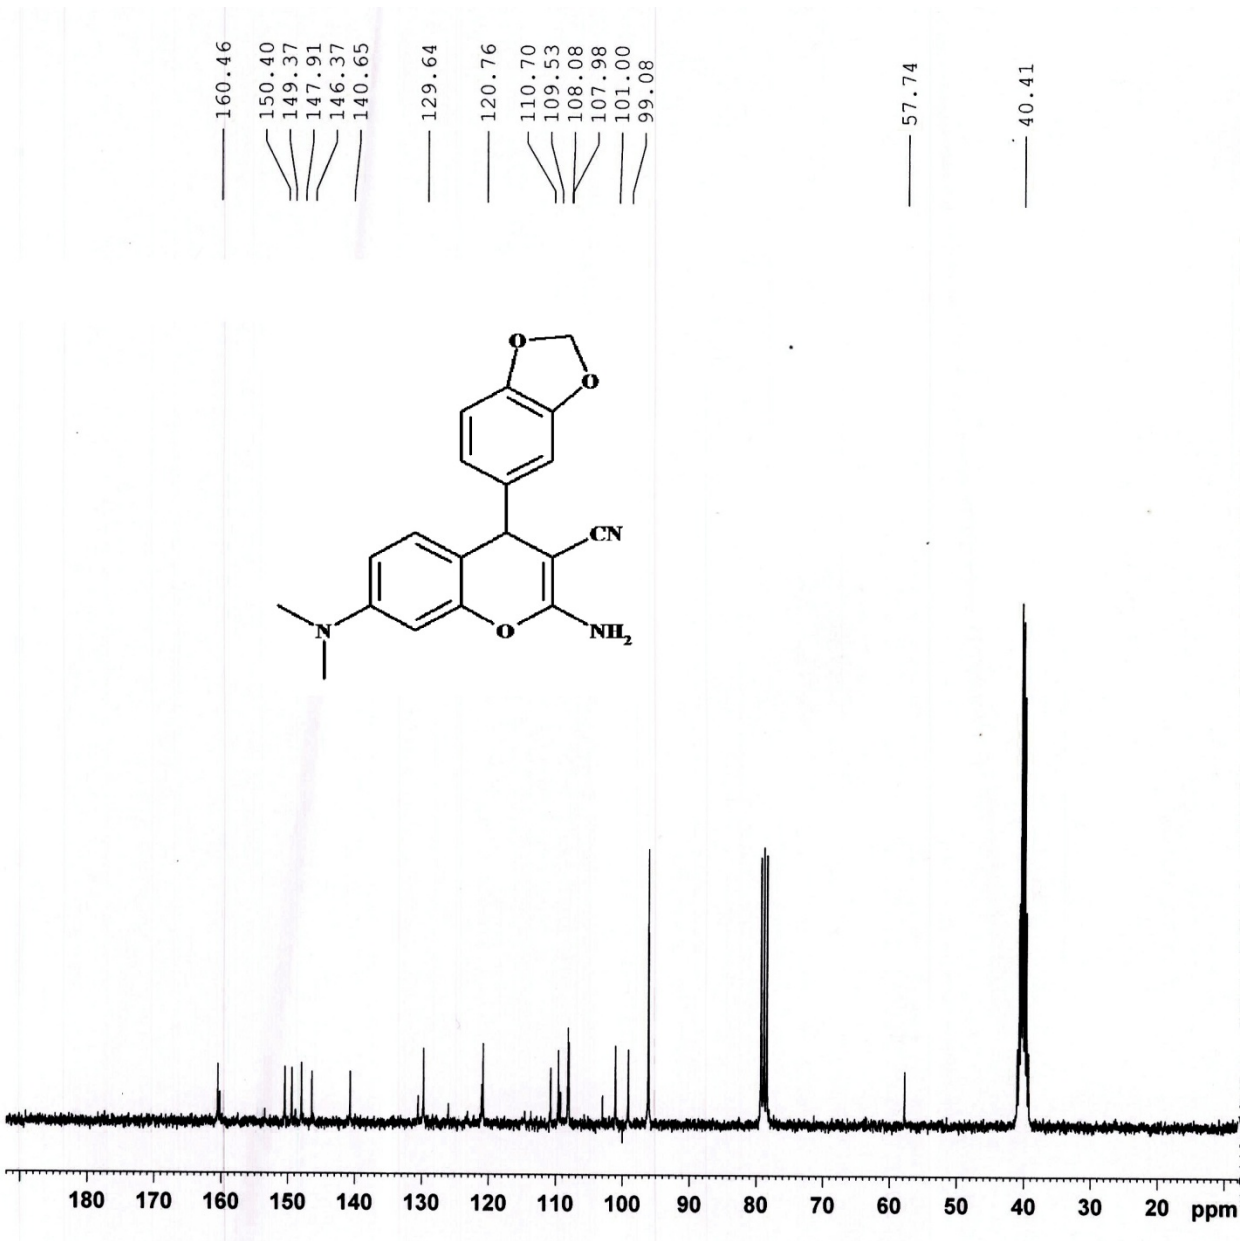

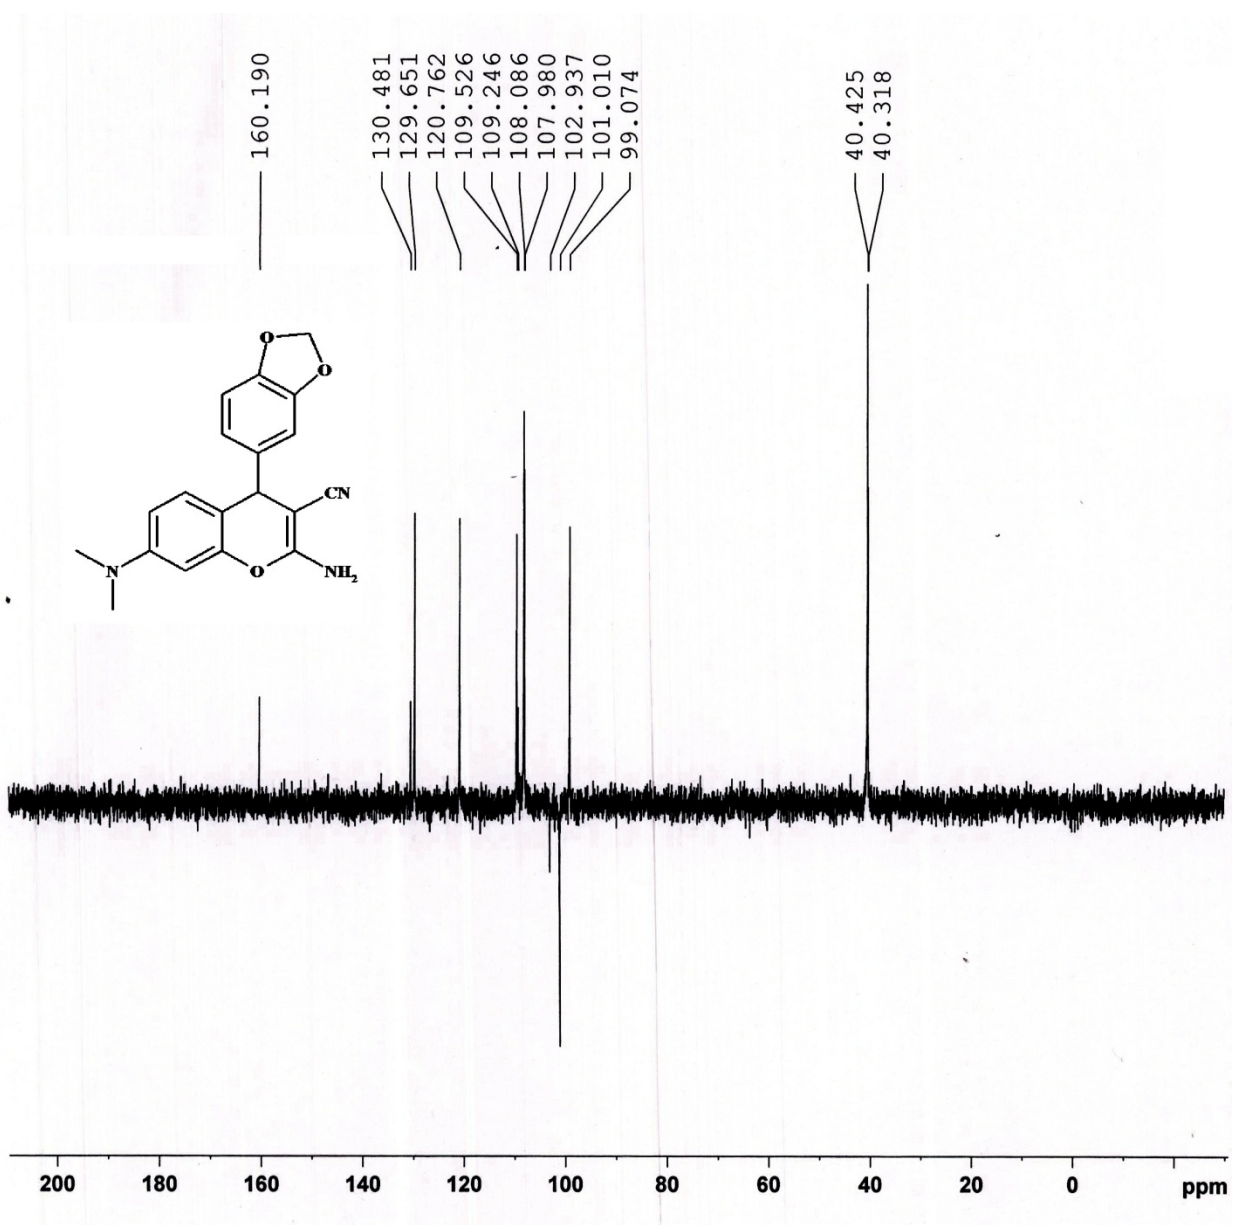

C-7\_141204110926 #944 RT: 4.20 AV: 1 NL: 1.41E9  
T: FTMS+p ESI Full ms [66.70-1000.00]



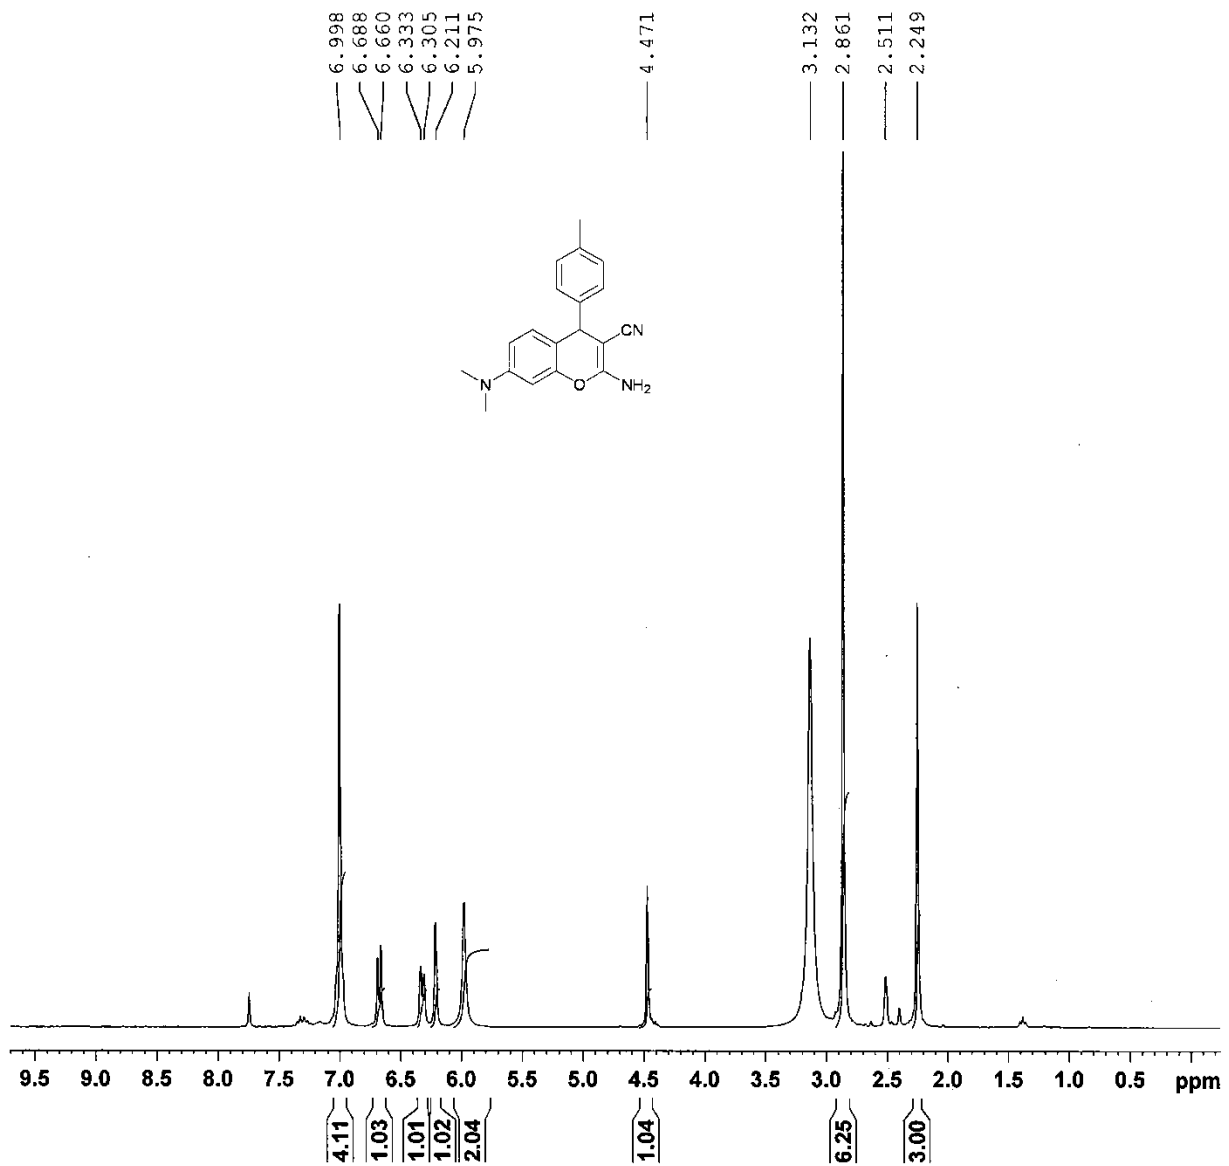

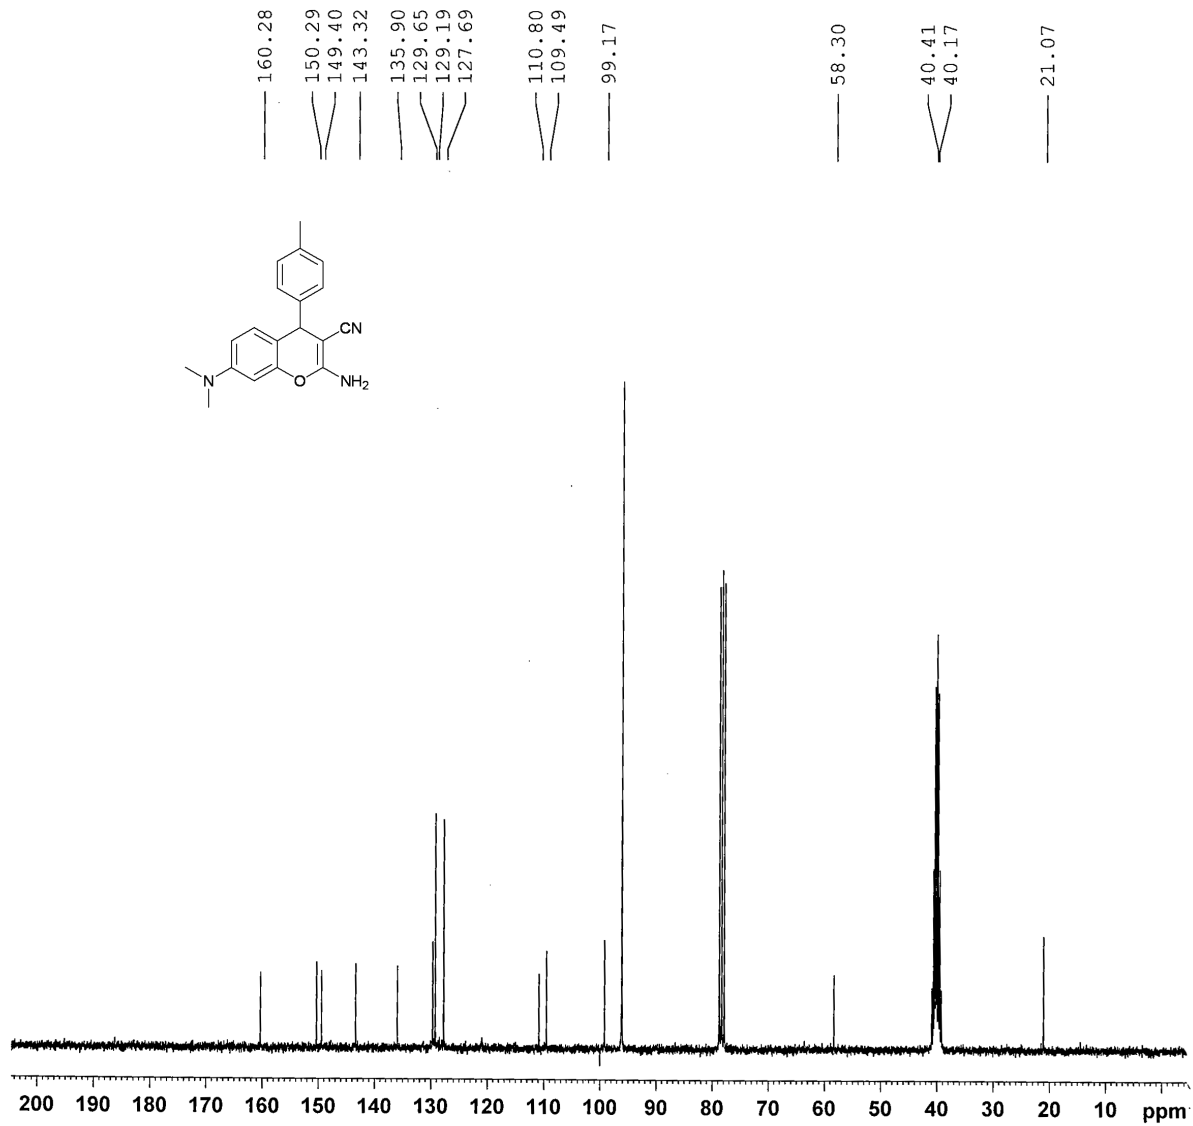

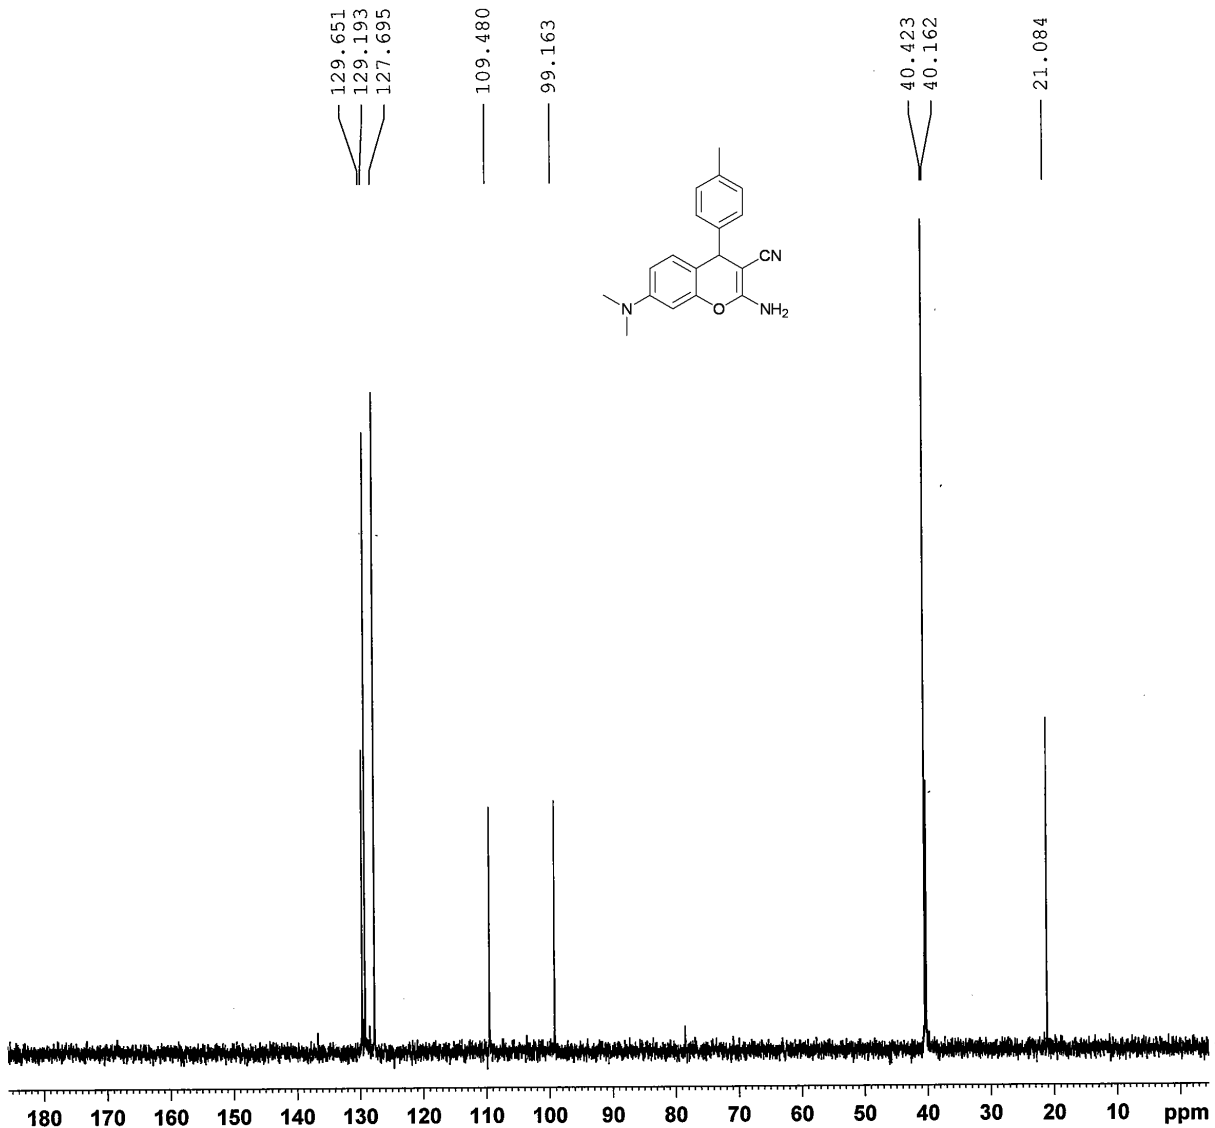

C-4 #1013 RT: 4.52 AV: 1 NL: 4.98E9  
T: FTMS+p ESI Full ms [66.70-1000.00]

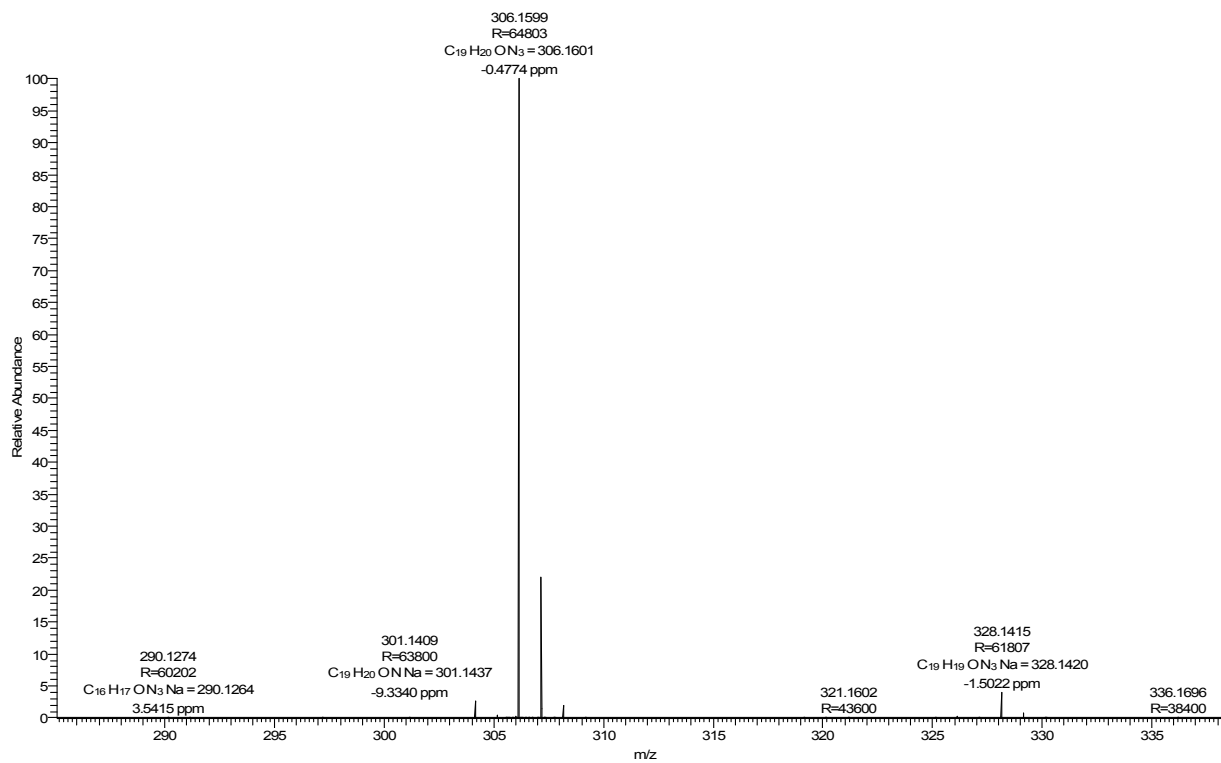



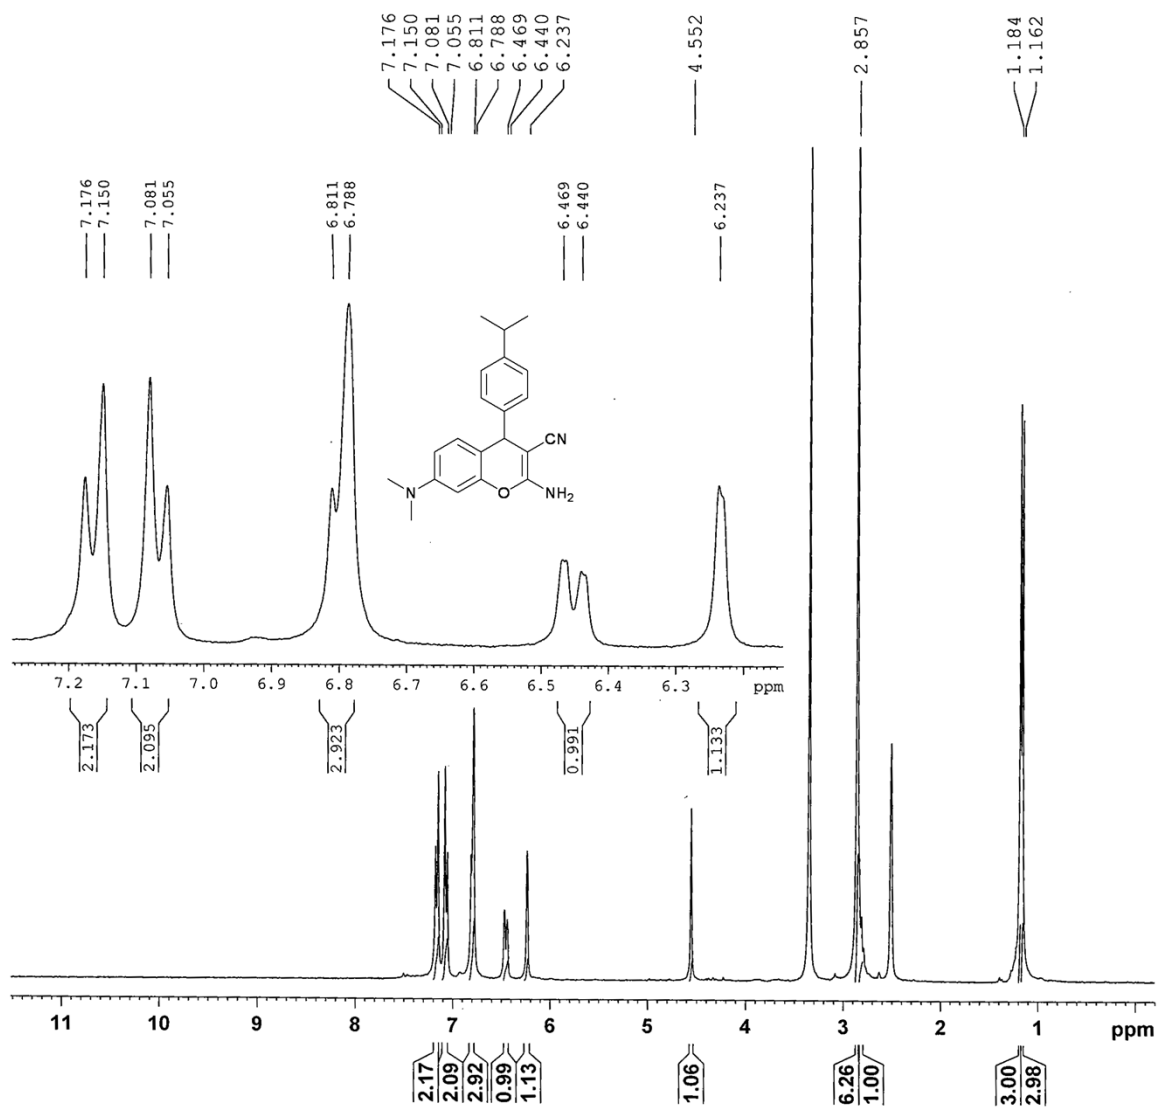

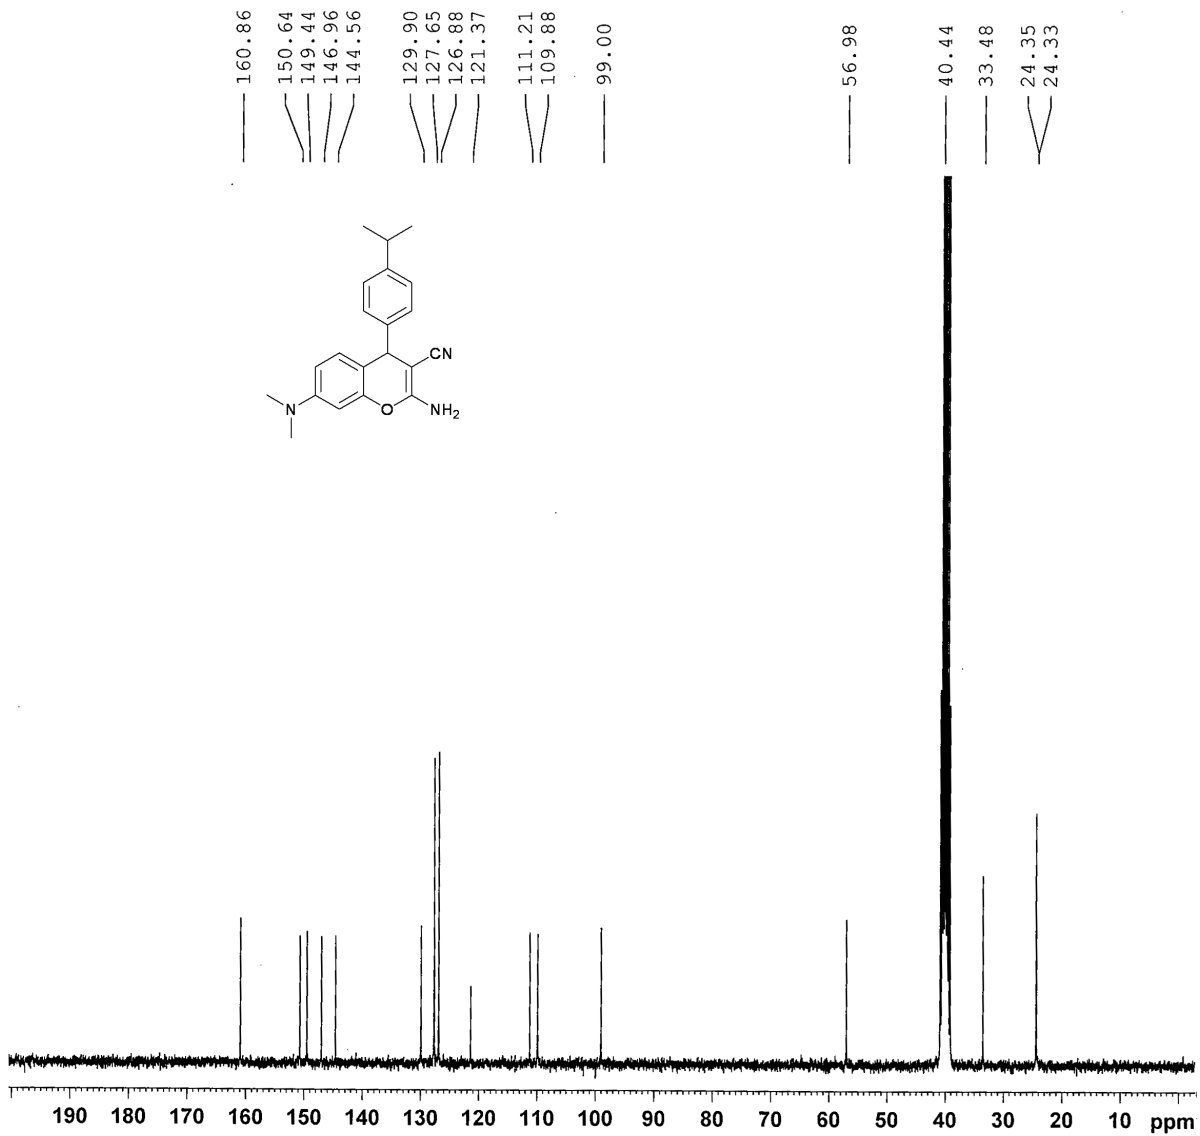

C-5\_141202175123 #1111 RT: 4.96 AV: 1 NL: 5.23E9  
T: FTMS+p ESI Full ms [66.70-1000.00]

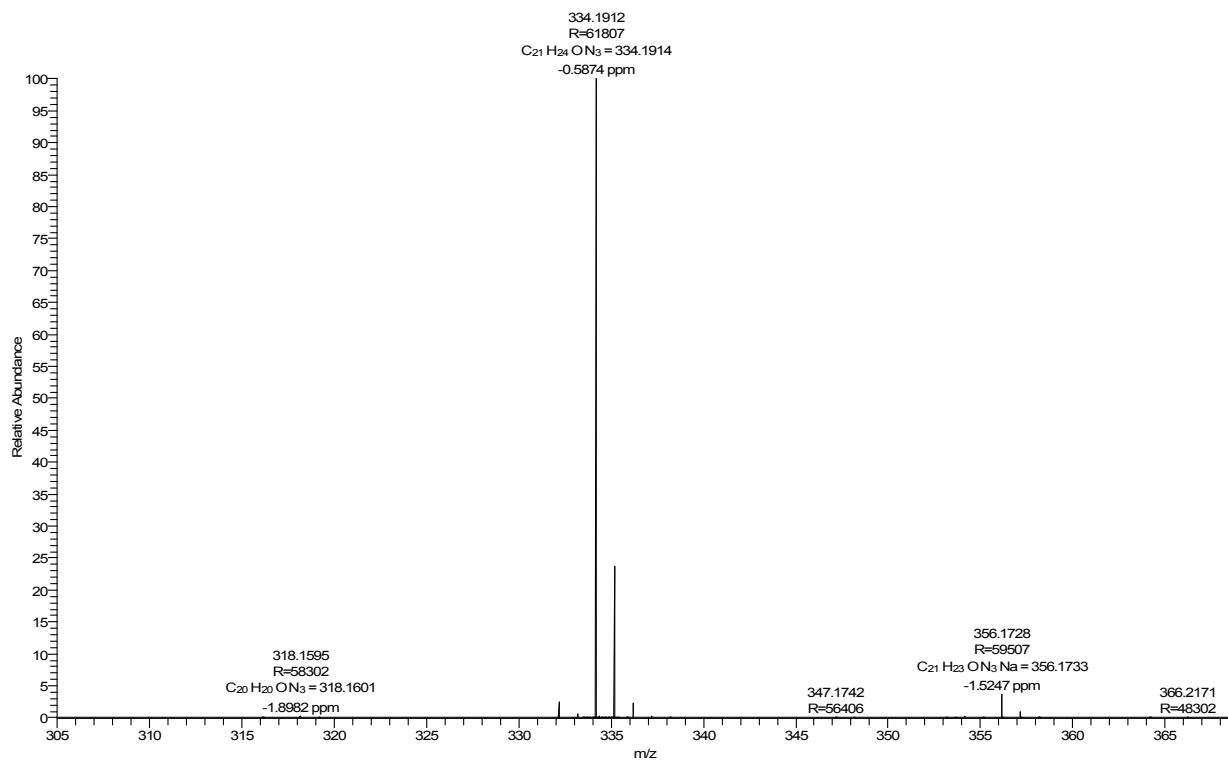

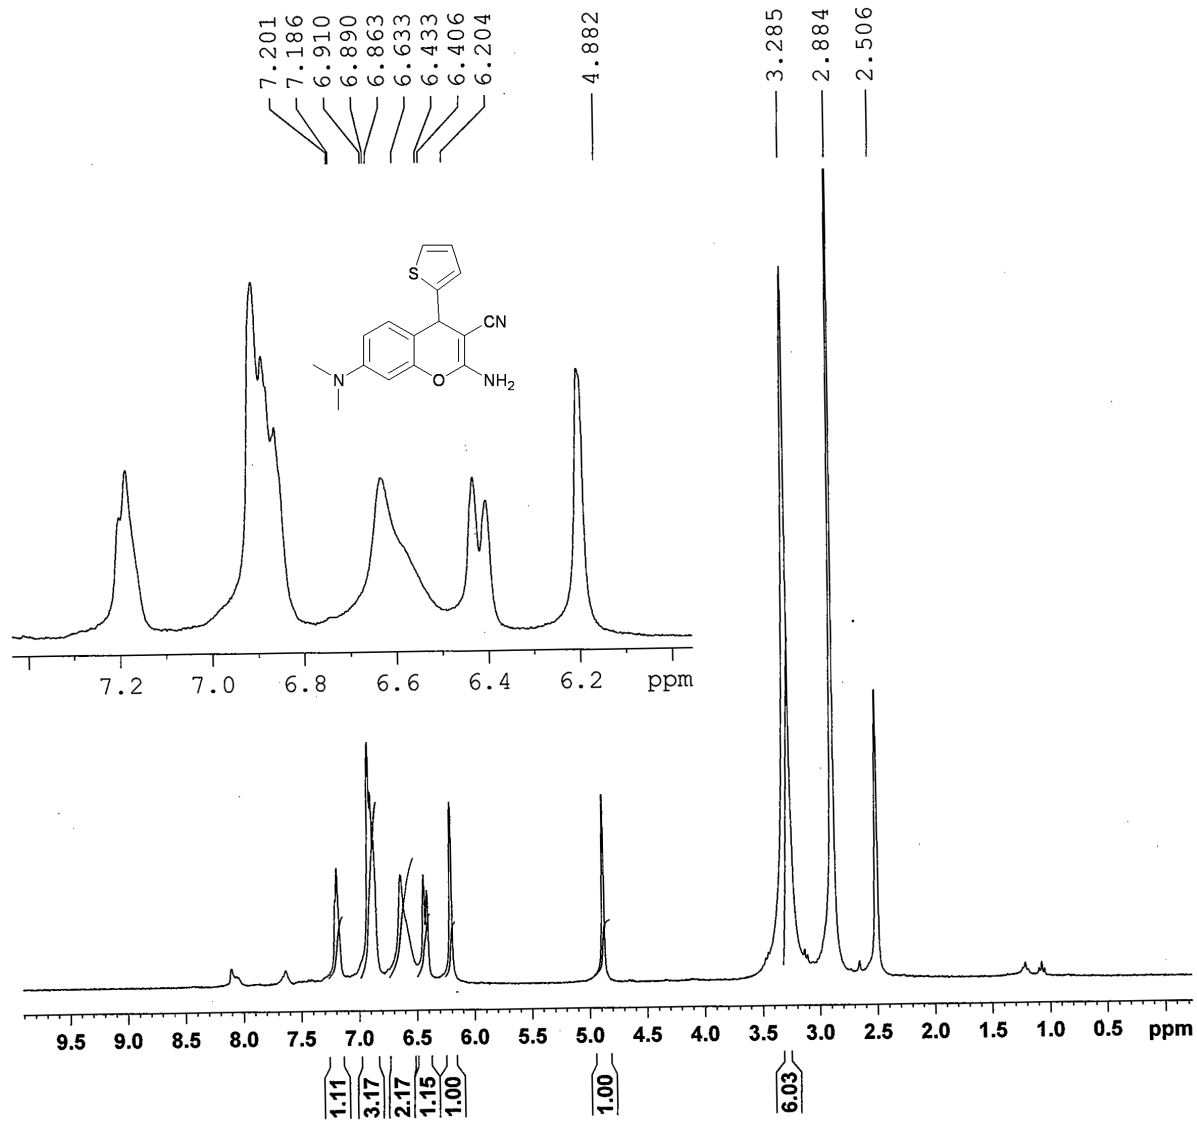

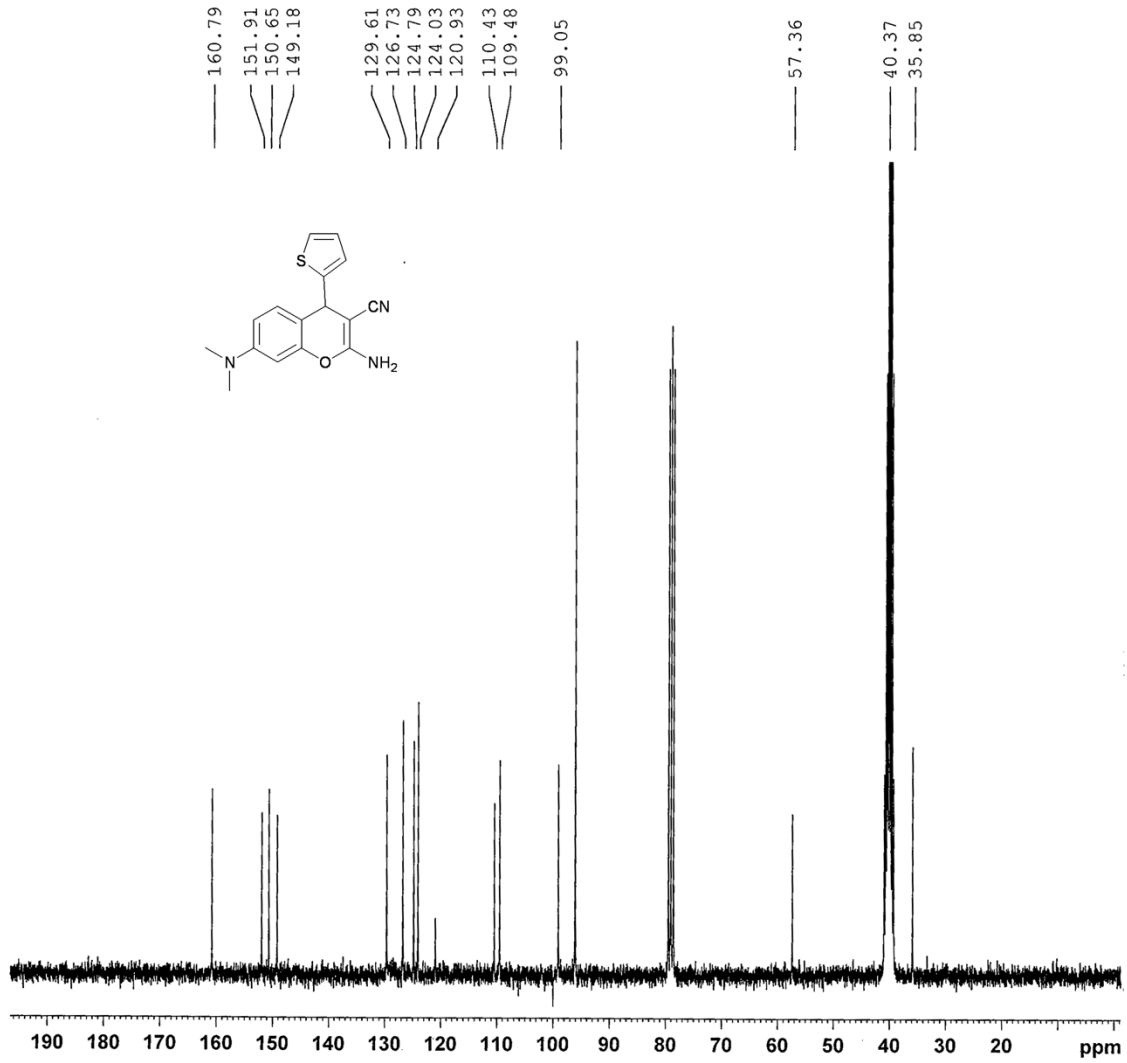

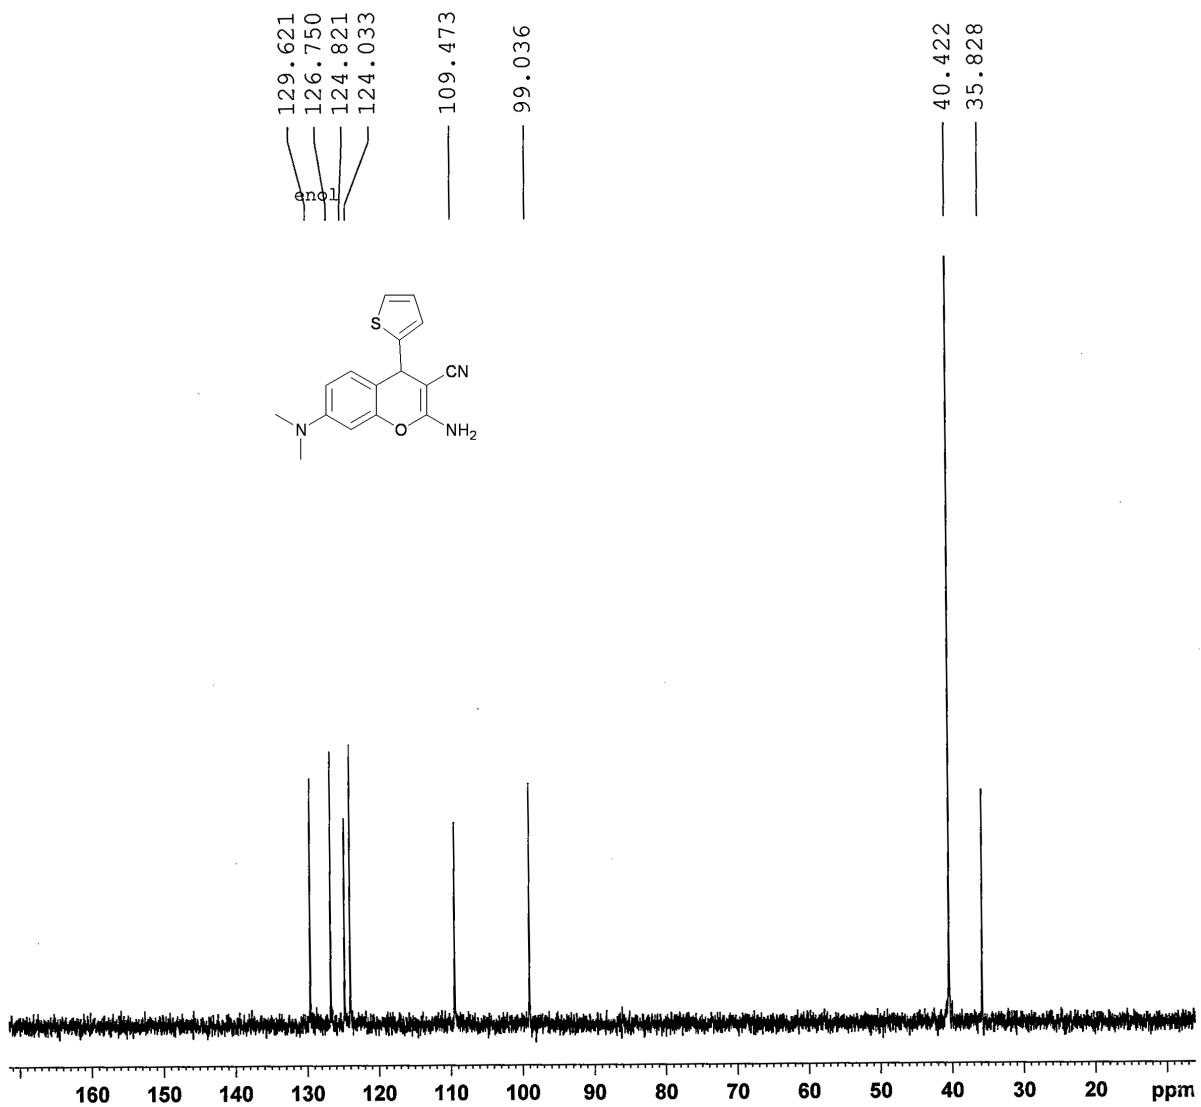

C-6\_141203170750 #925 RT: 4.12 AV: 1 NL: 1.12E9  
T: FTMS+p ESI Full ms [100.00-900.00]

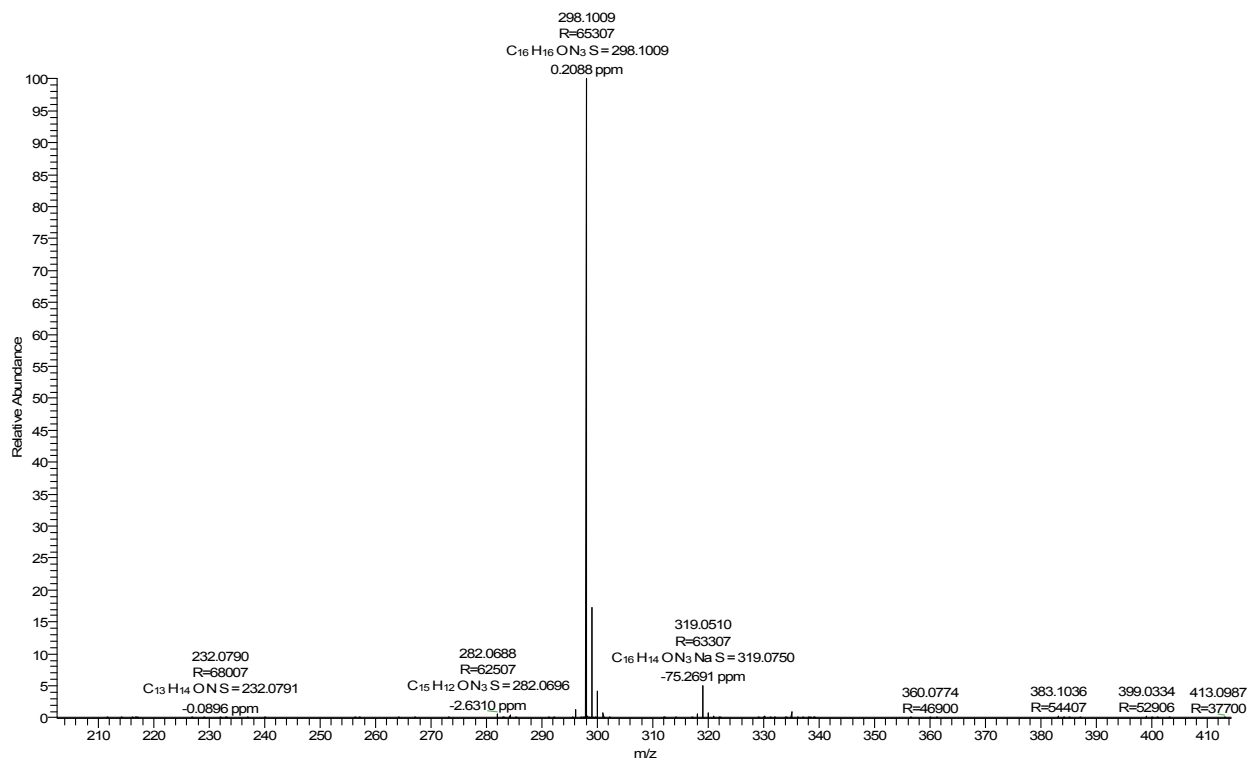

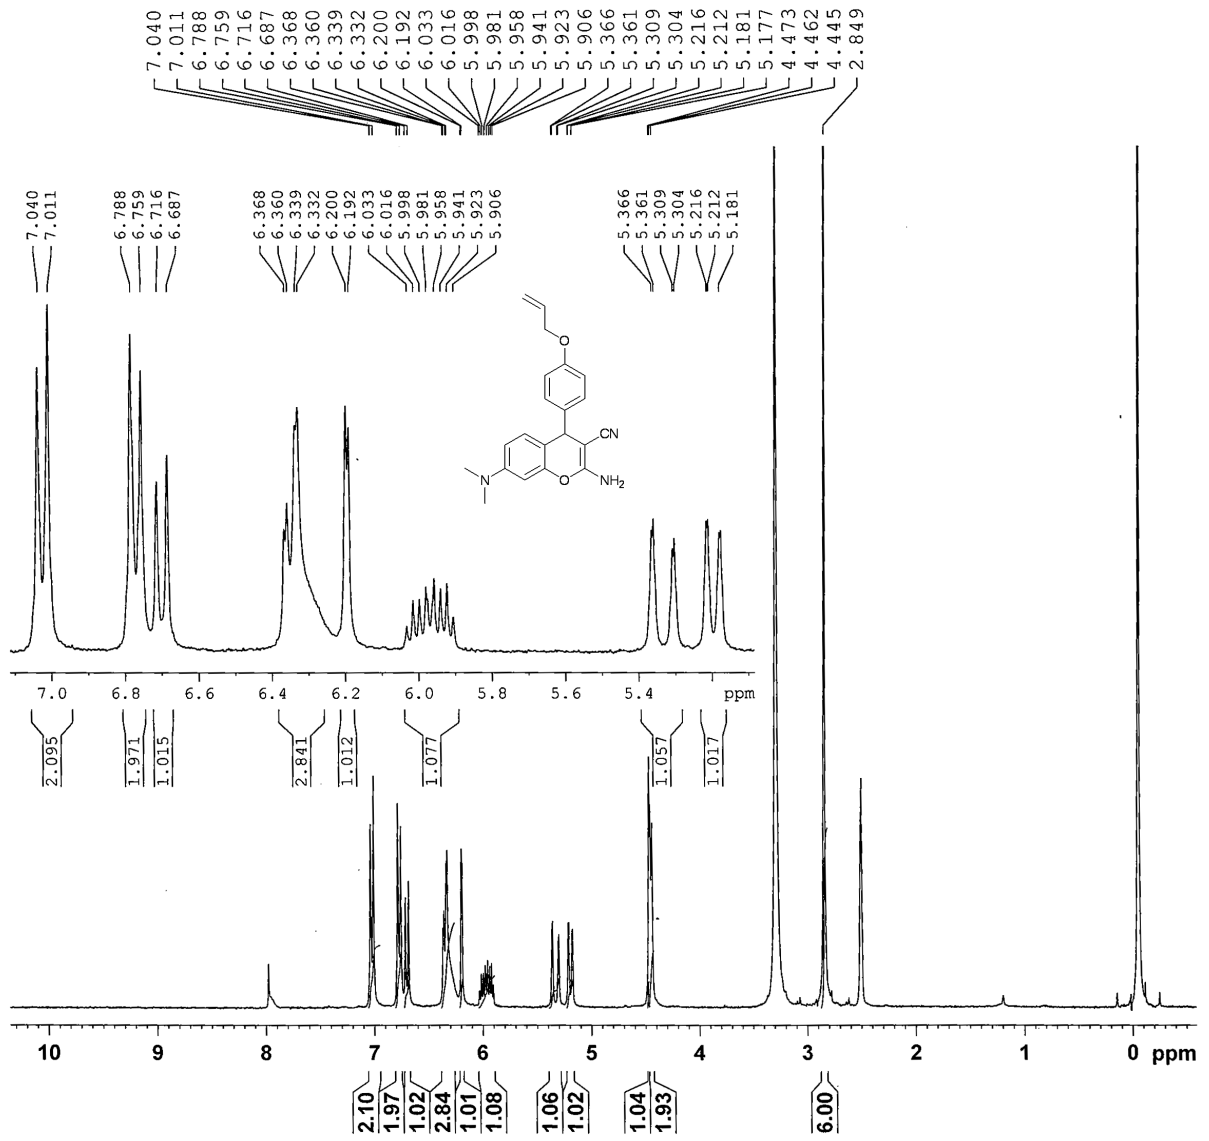



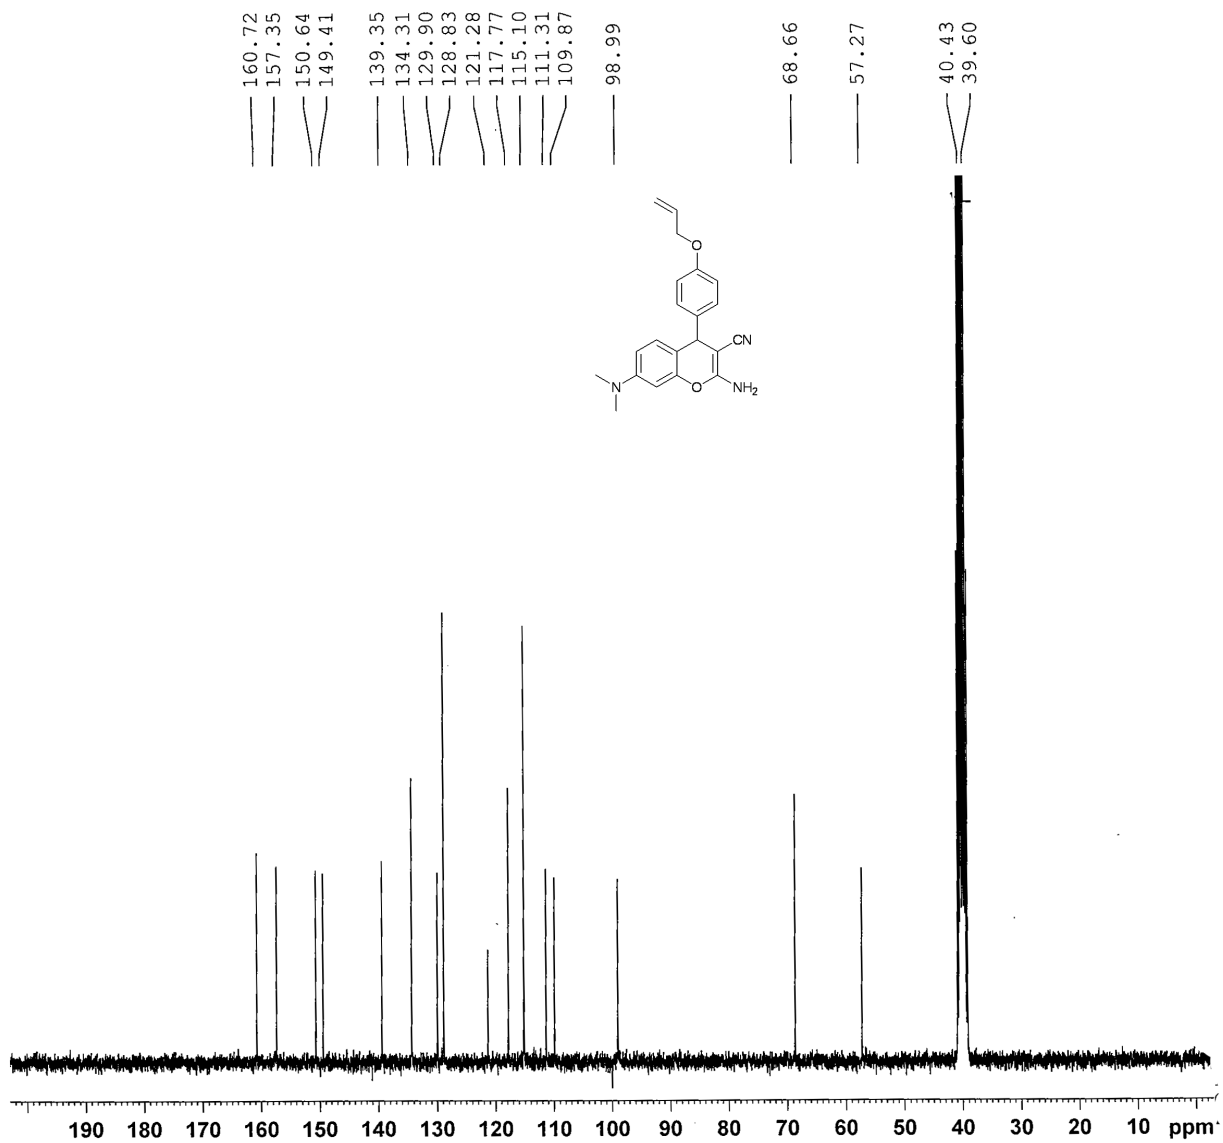

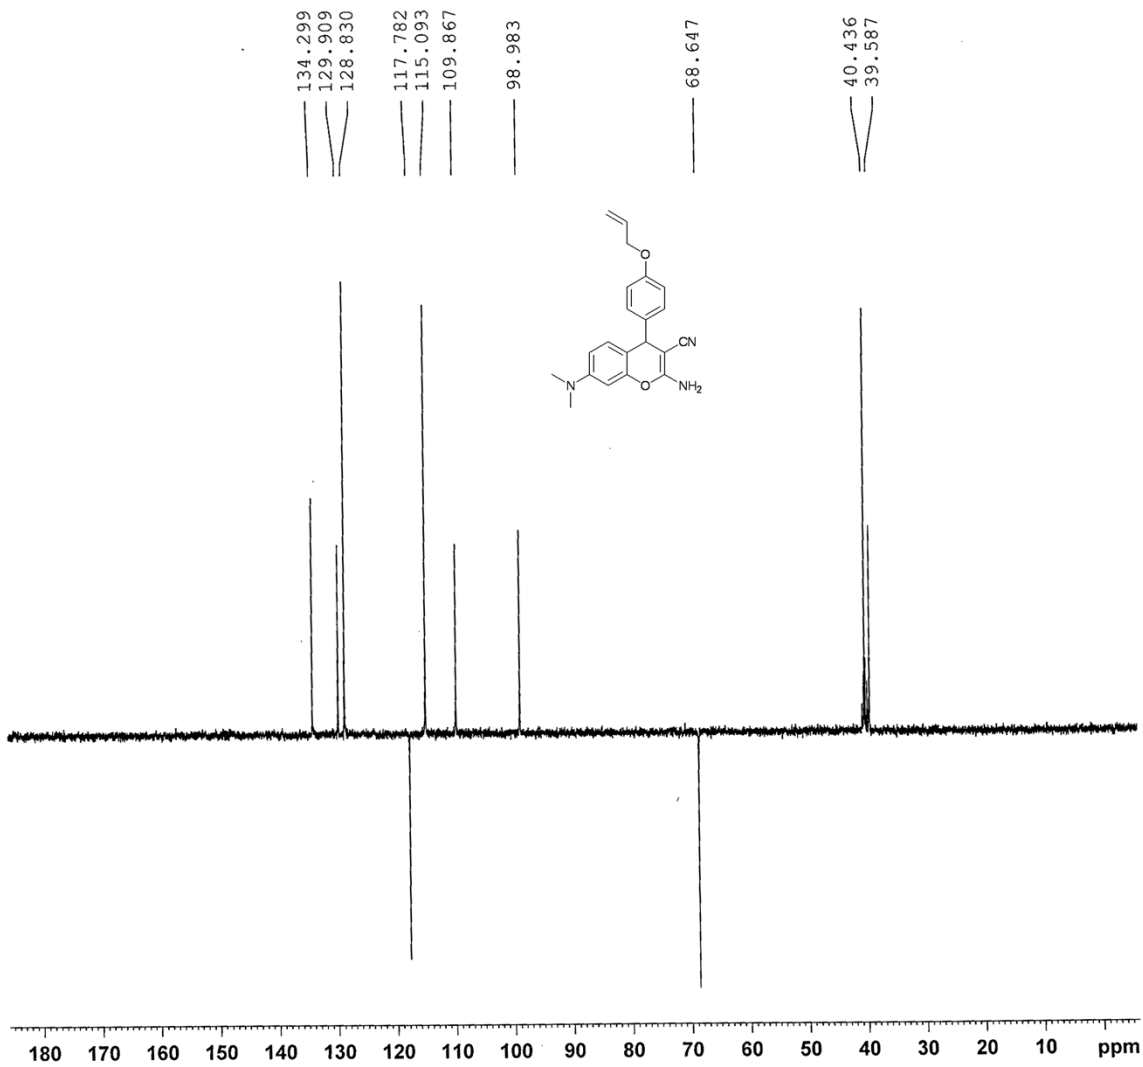

C-2\_141202171751#1001 RT: 4.46 AV: 1 NL: 2.22E9  
T: FTMS+p ESI Full ms [66.70-1000.00]

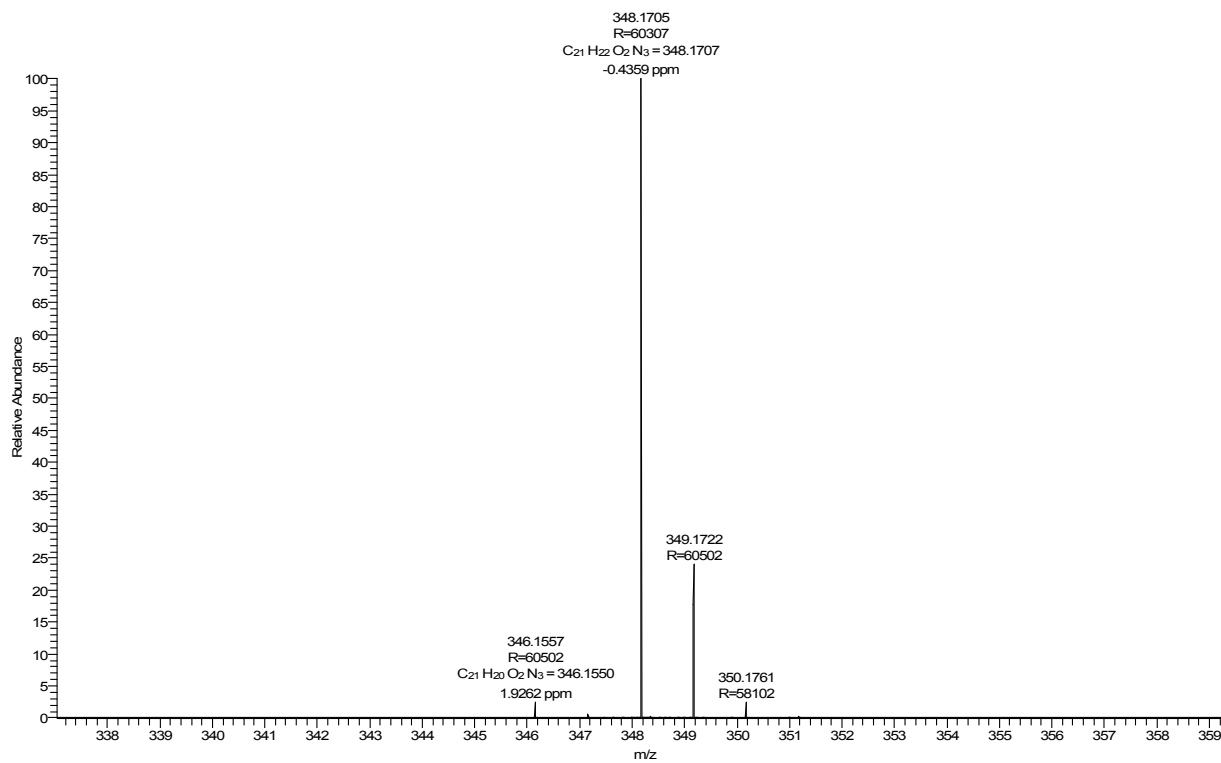

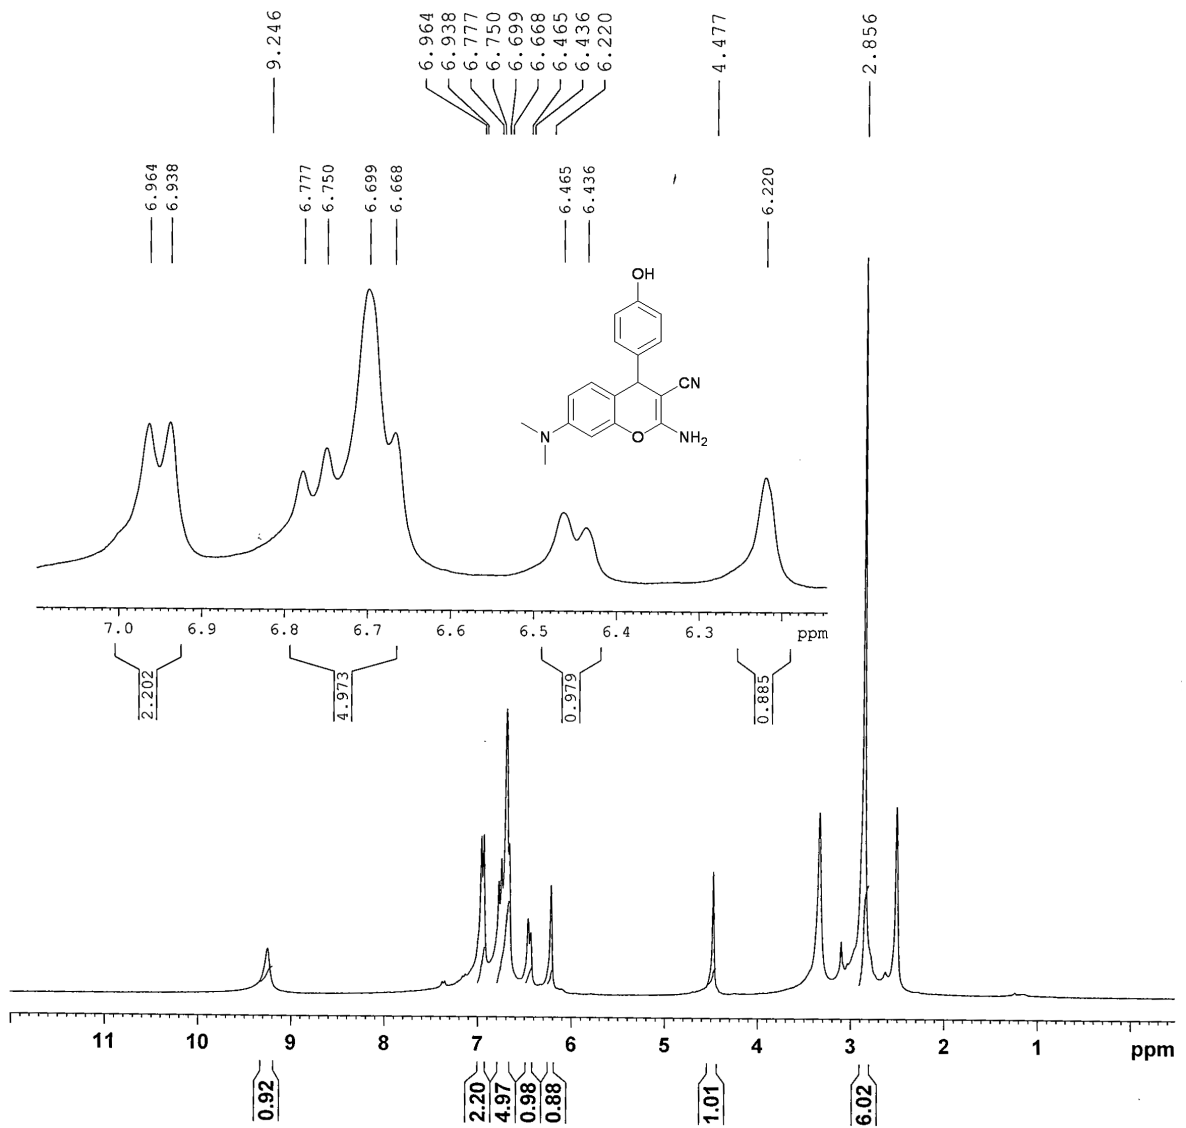

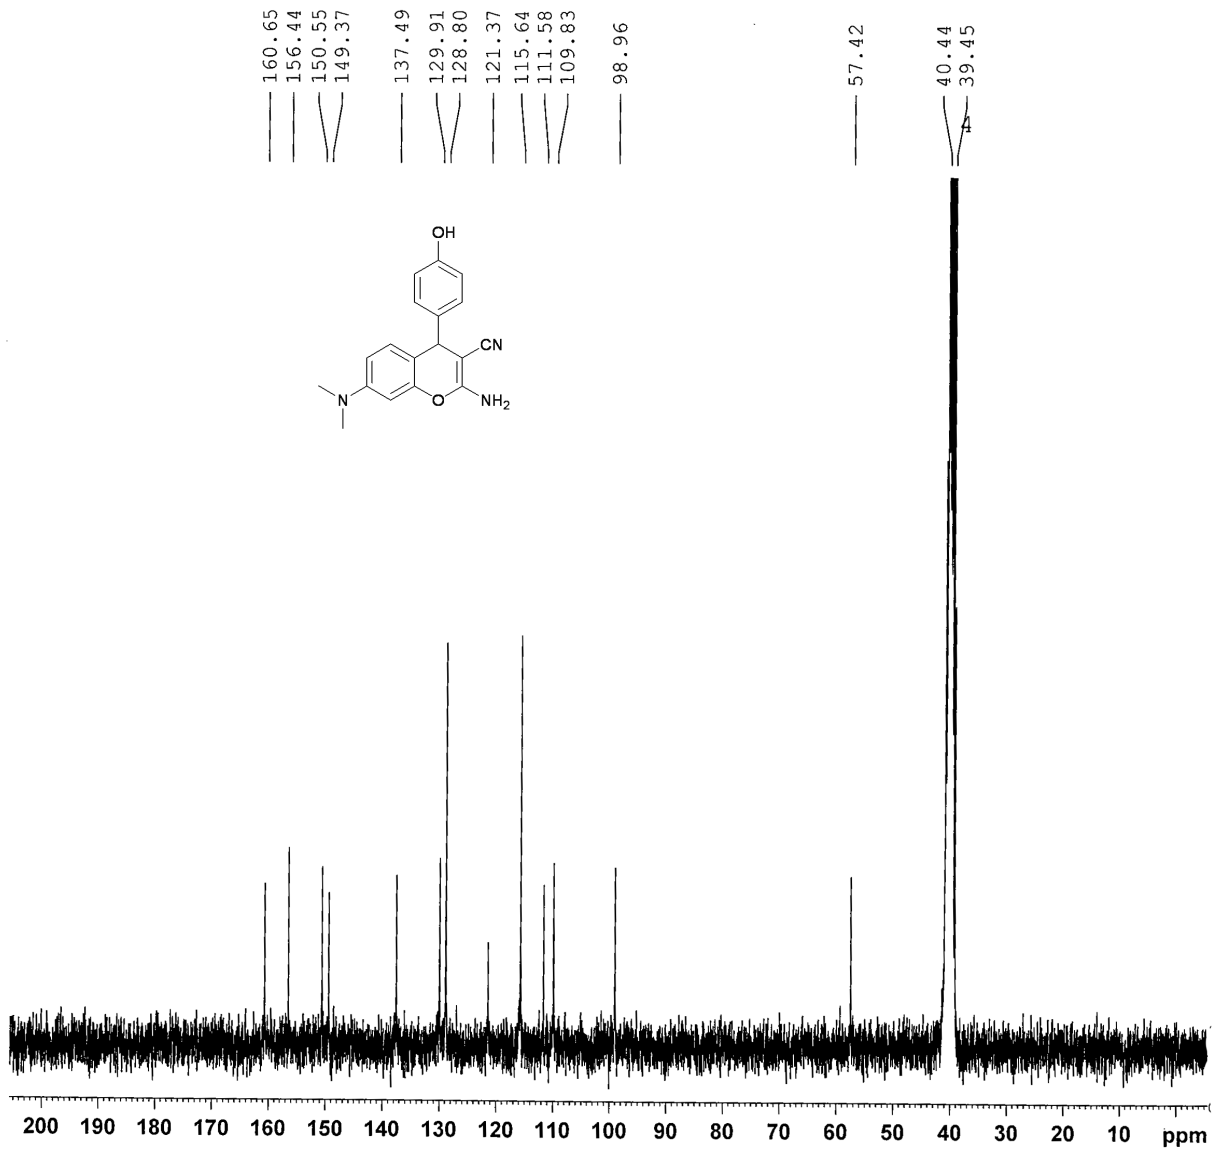

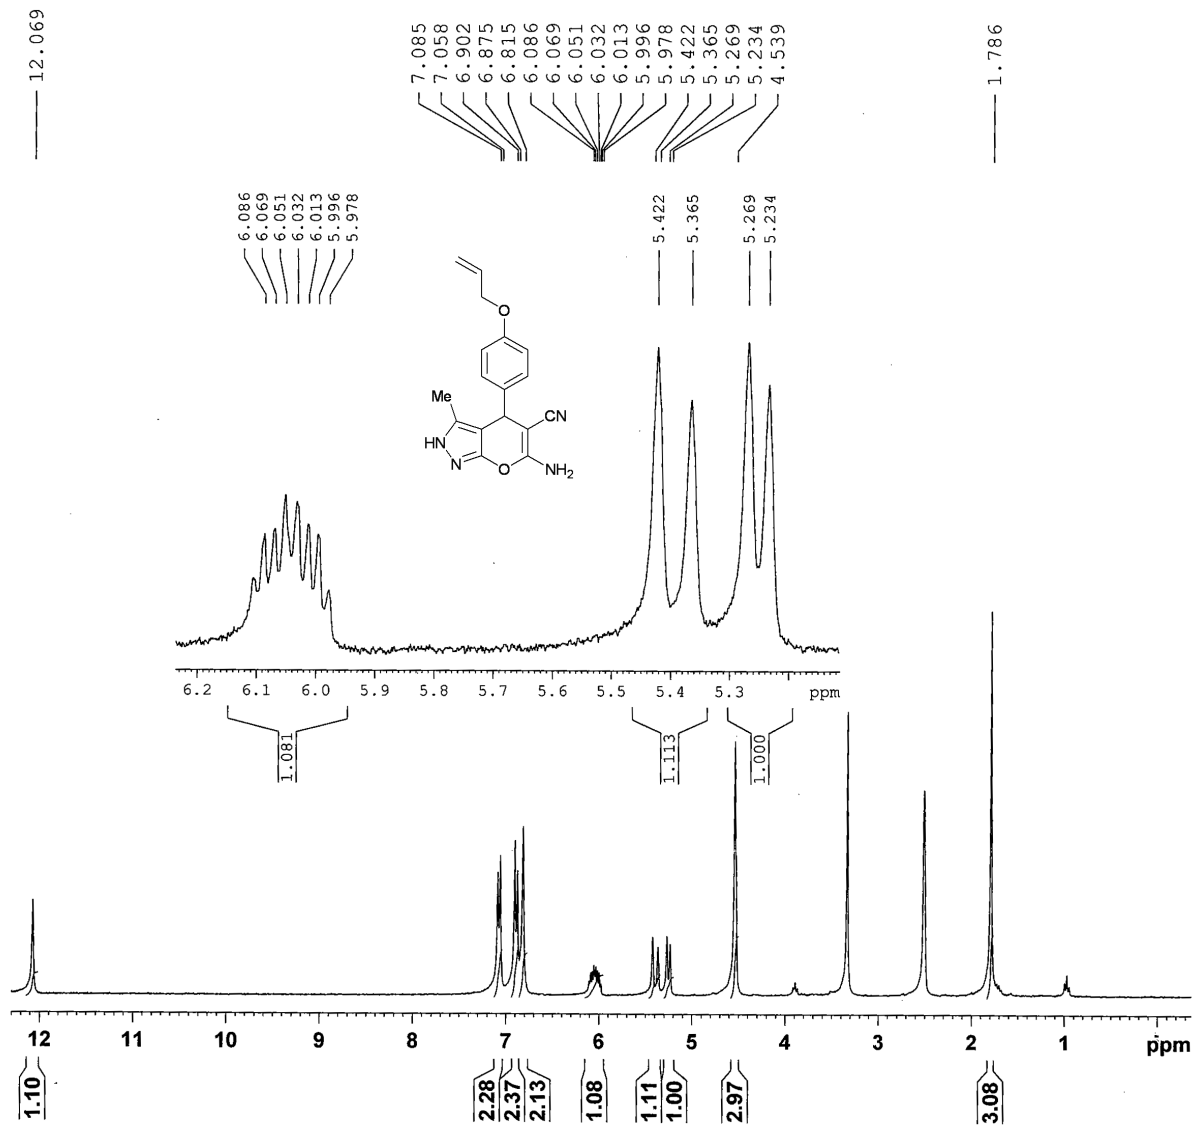

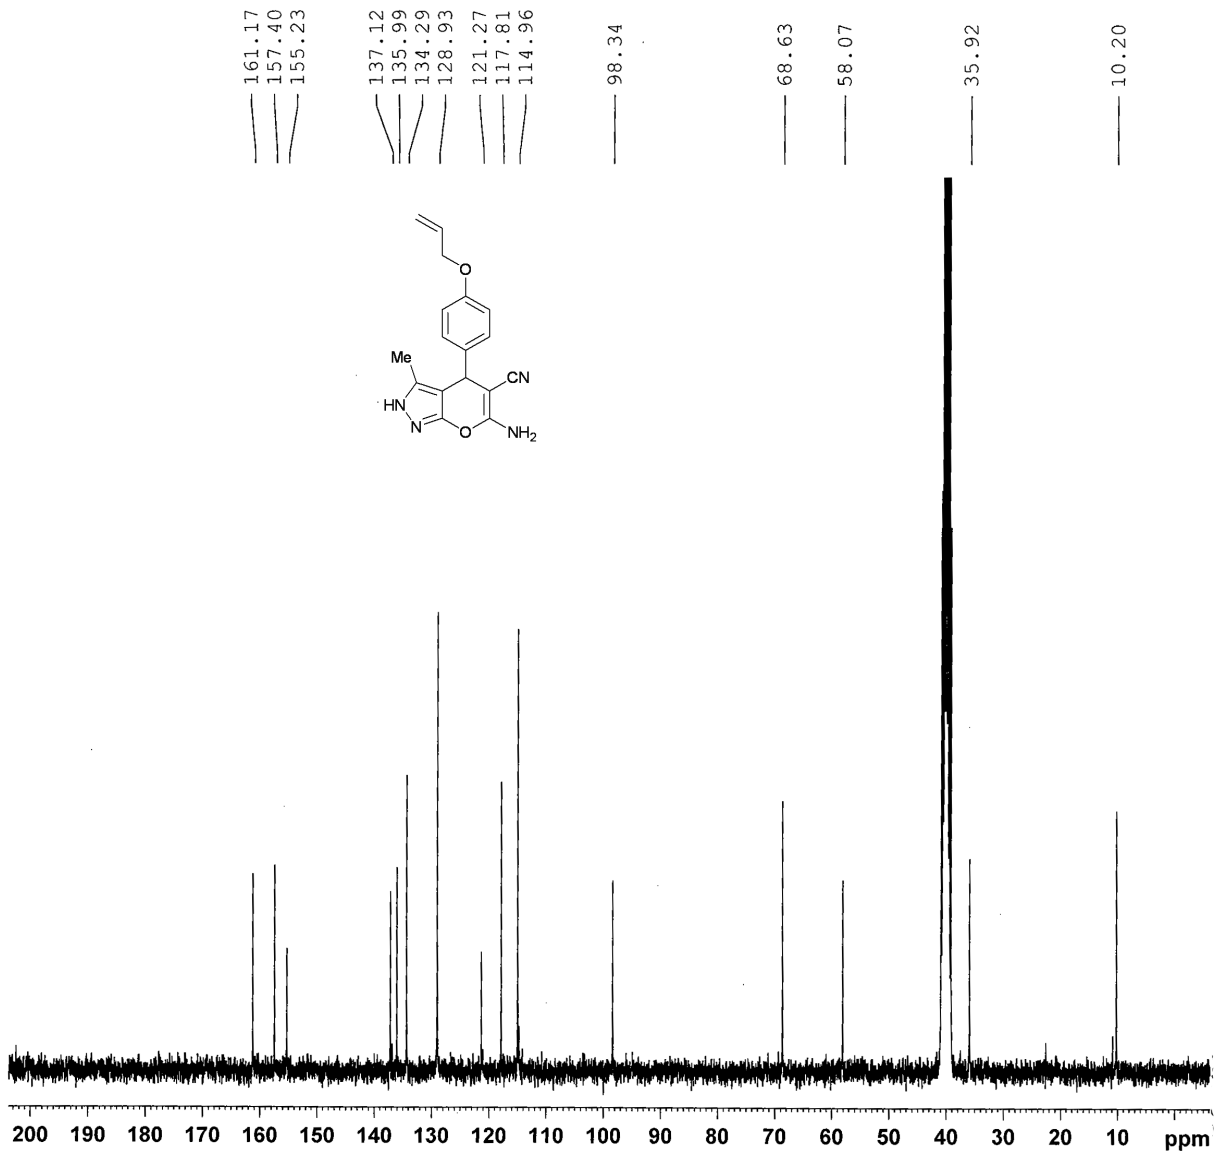

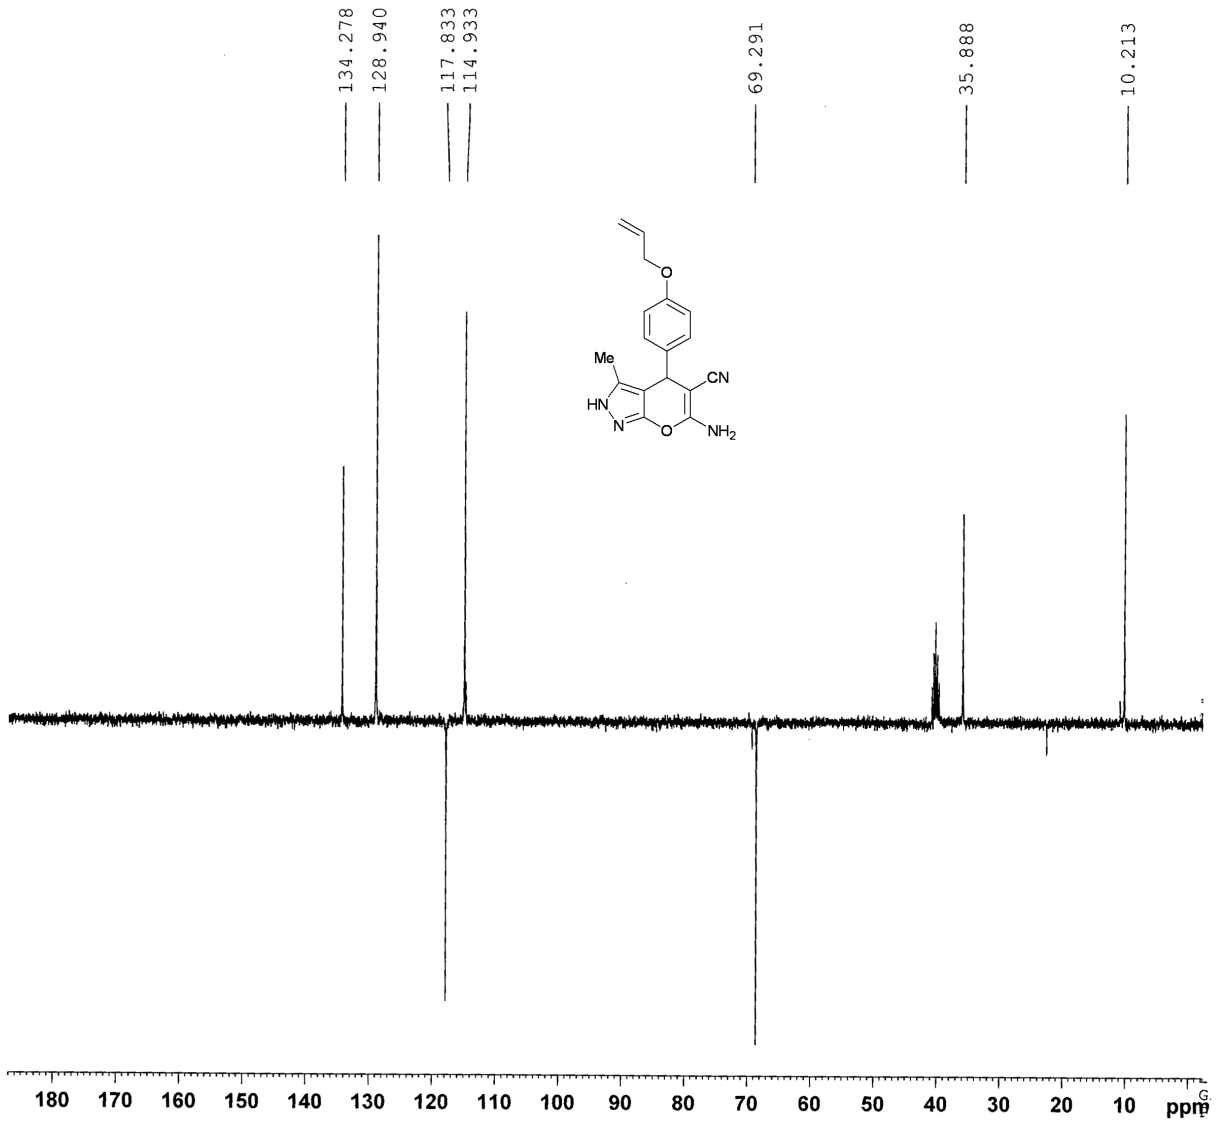



B-3\_141107171726 #871 RT: 3.88 AV: 1 NL: 6.72E8  
T: FTMS + p ESI Full ms [66.70-1000.00]

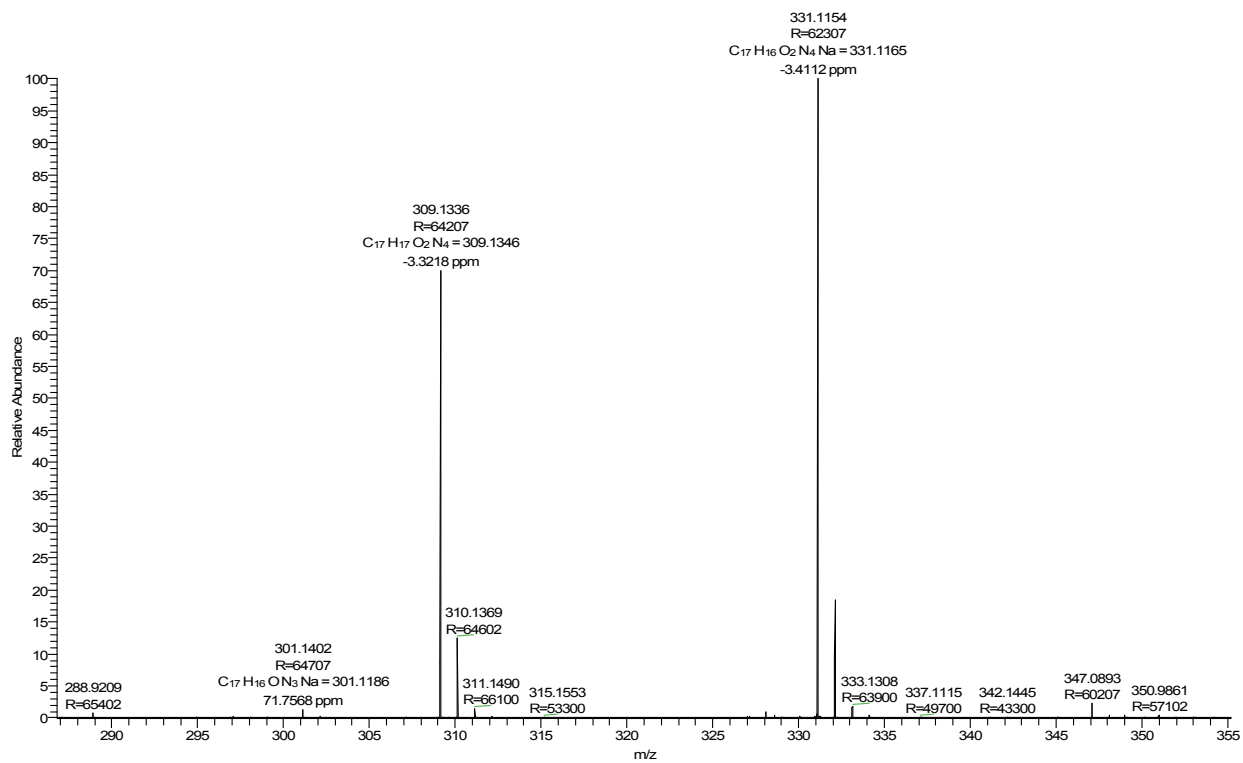

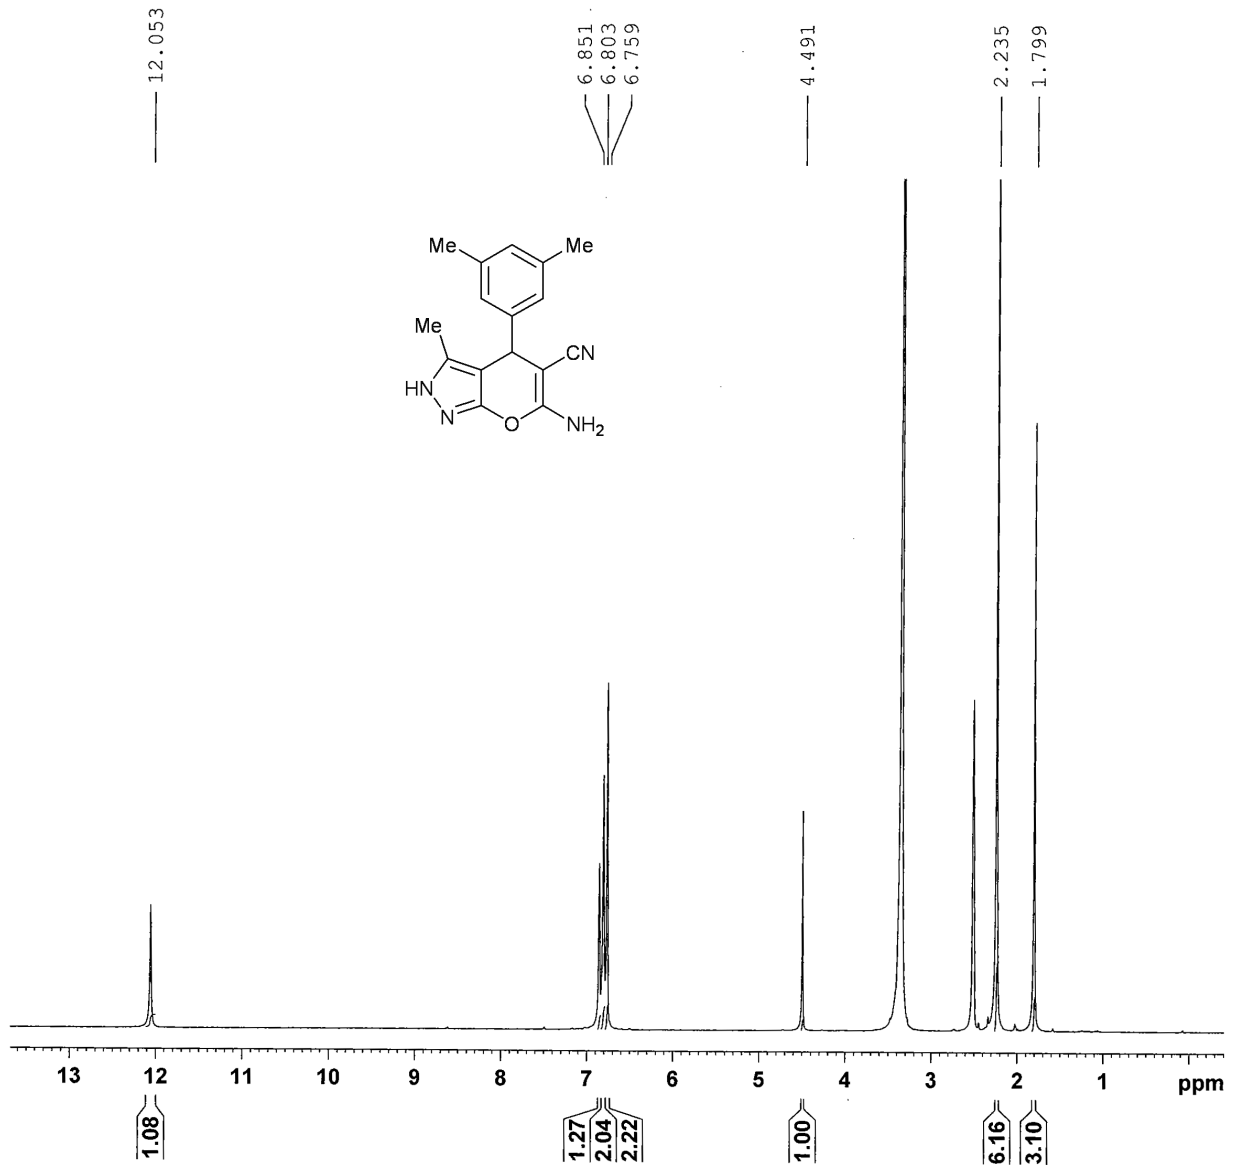

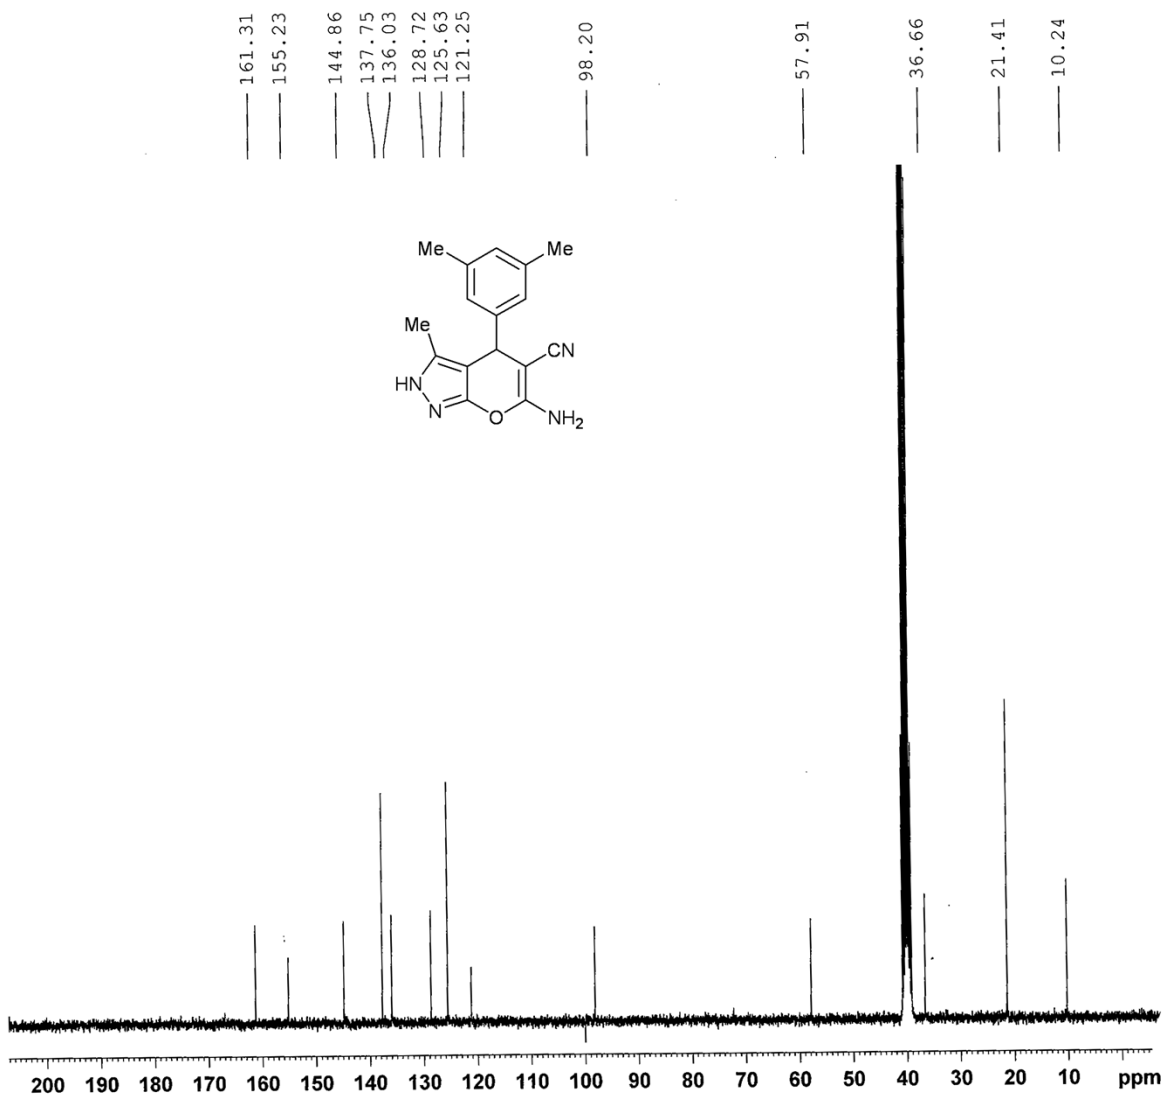

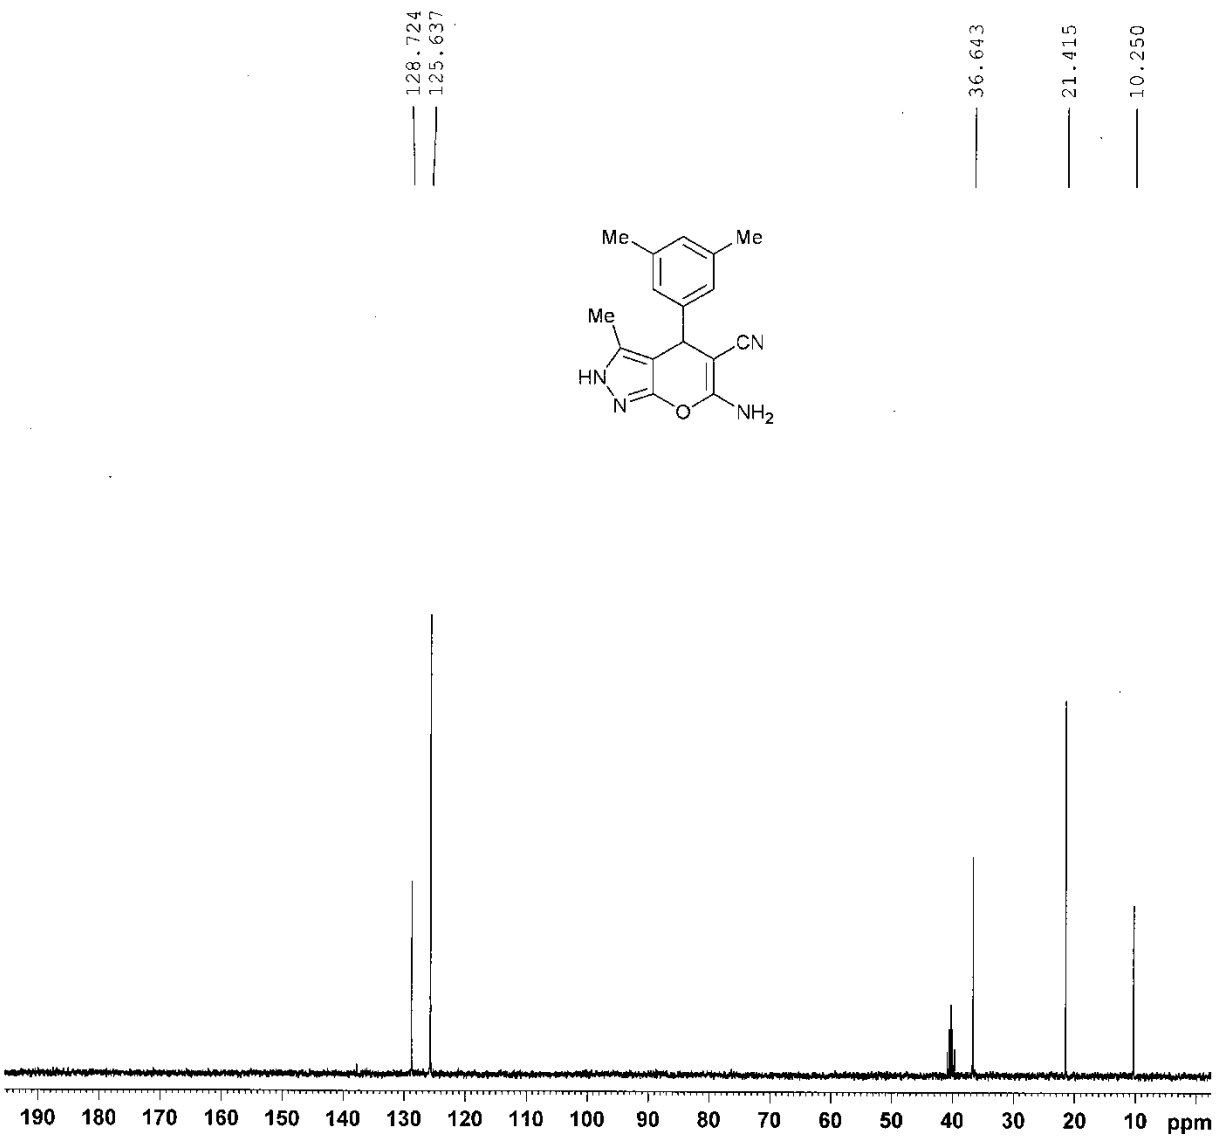

B-4 #865 RT: 3.86 AV: 1 NL: 1.17E8  
T: FTMS + p ESI Full ms [66.70-1000.00]

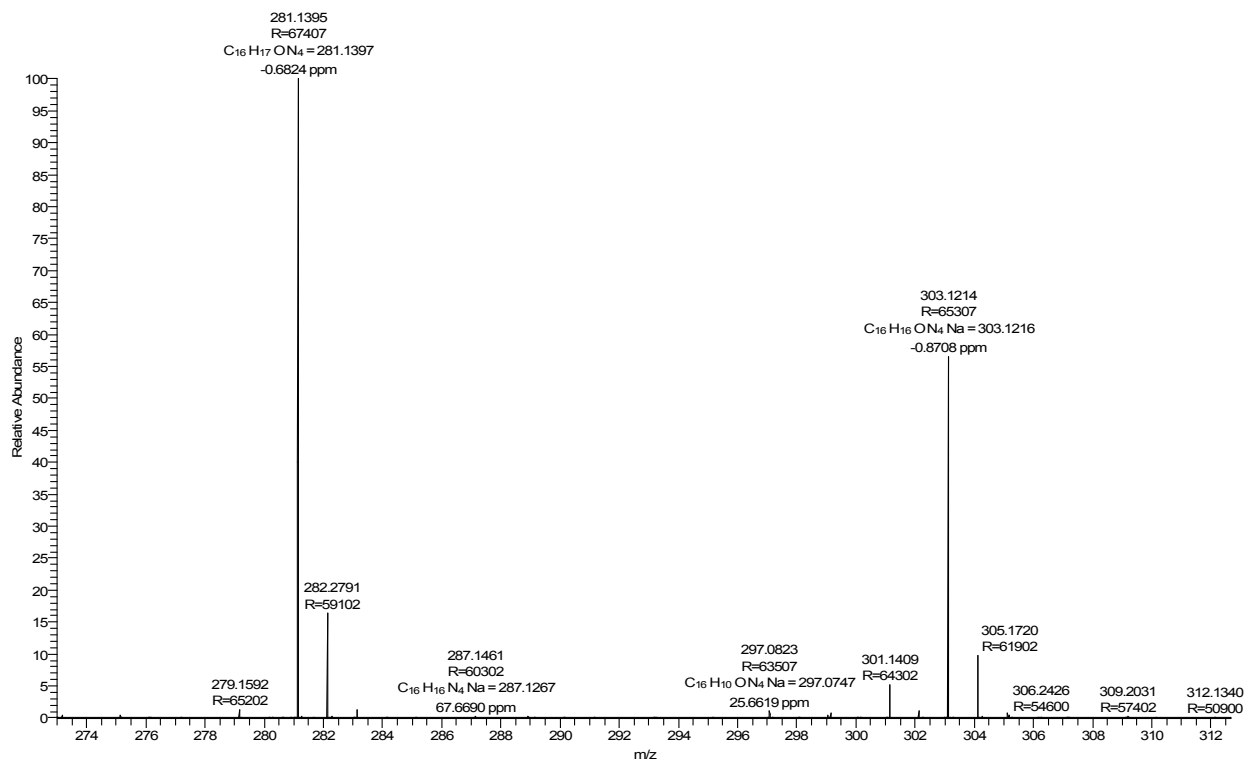

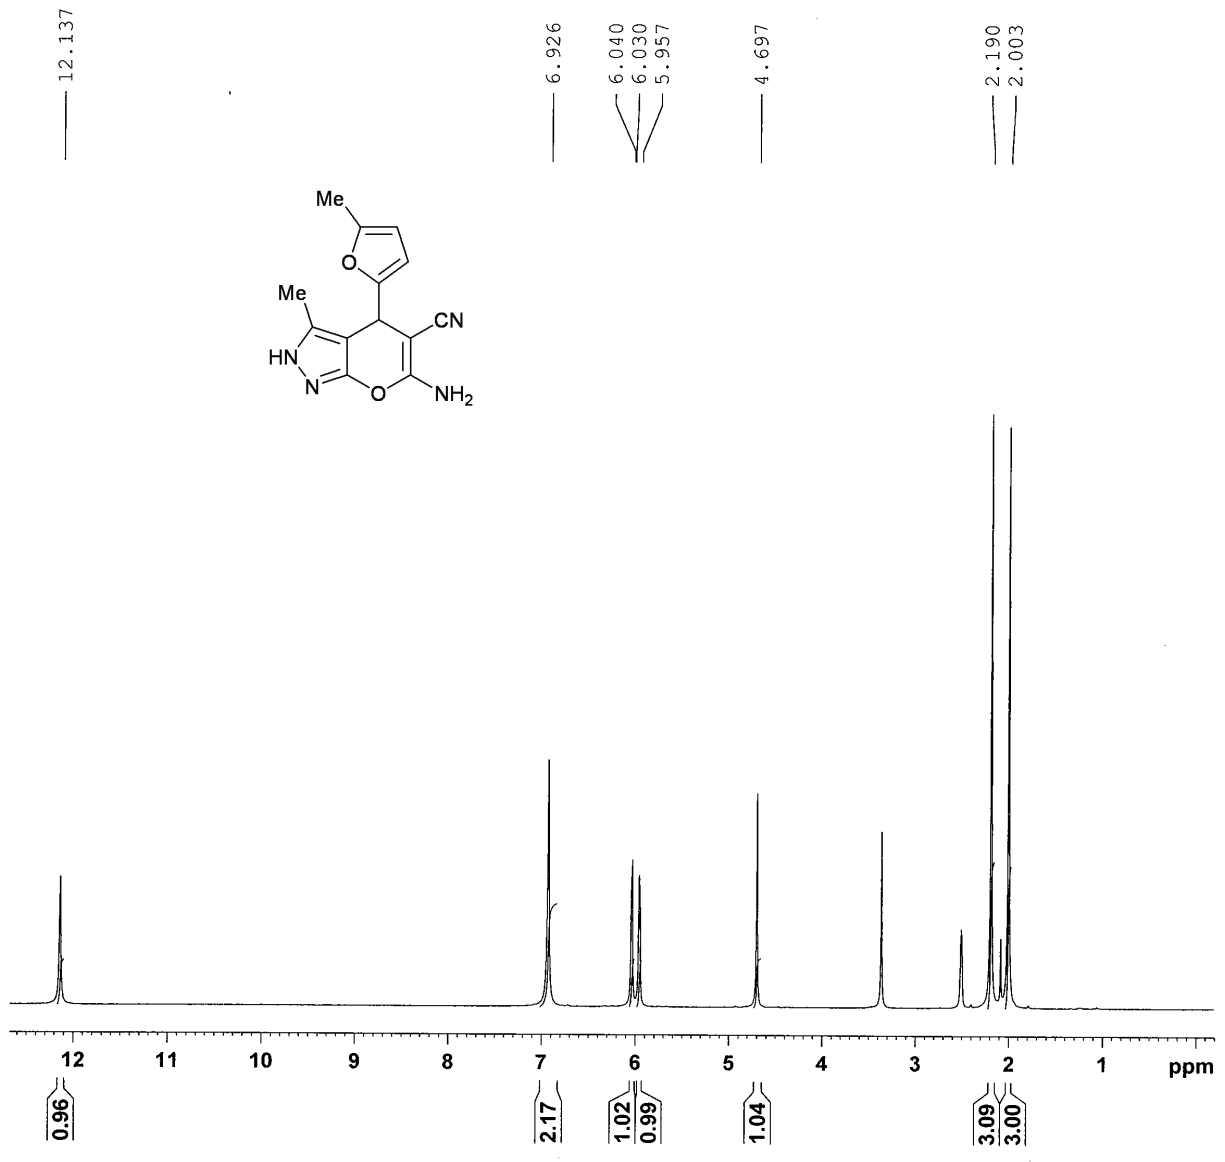

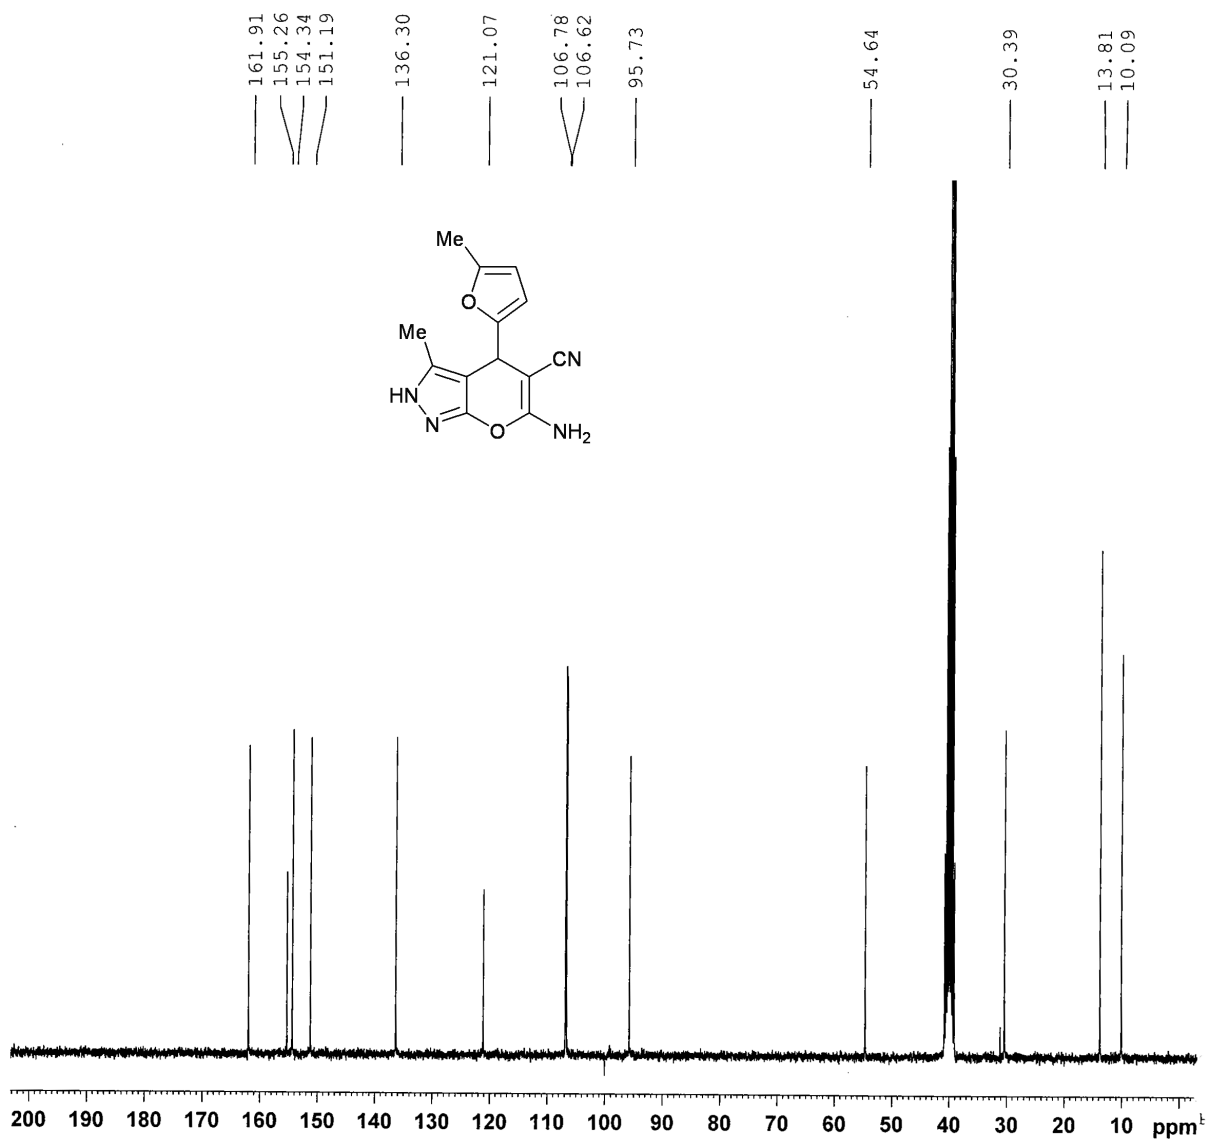

106.787  
106.619

30.374

13.816  
10.090

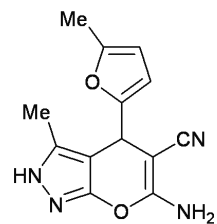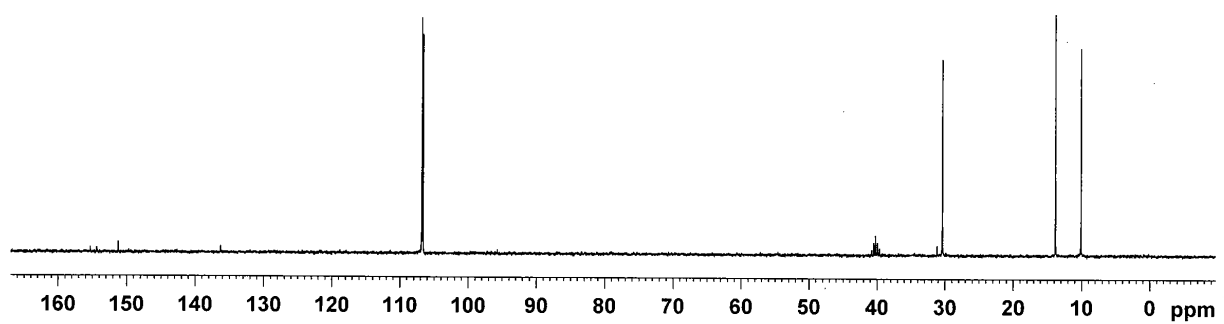



B-1 #848 RT: 3.78 AV: 1 NL: 7.96E8  
T: FTMS + p ESI Full ms [66.70-1000.00]

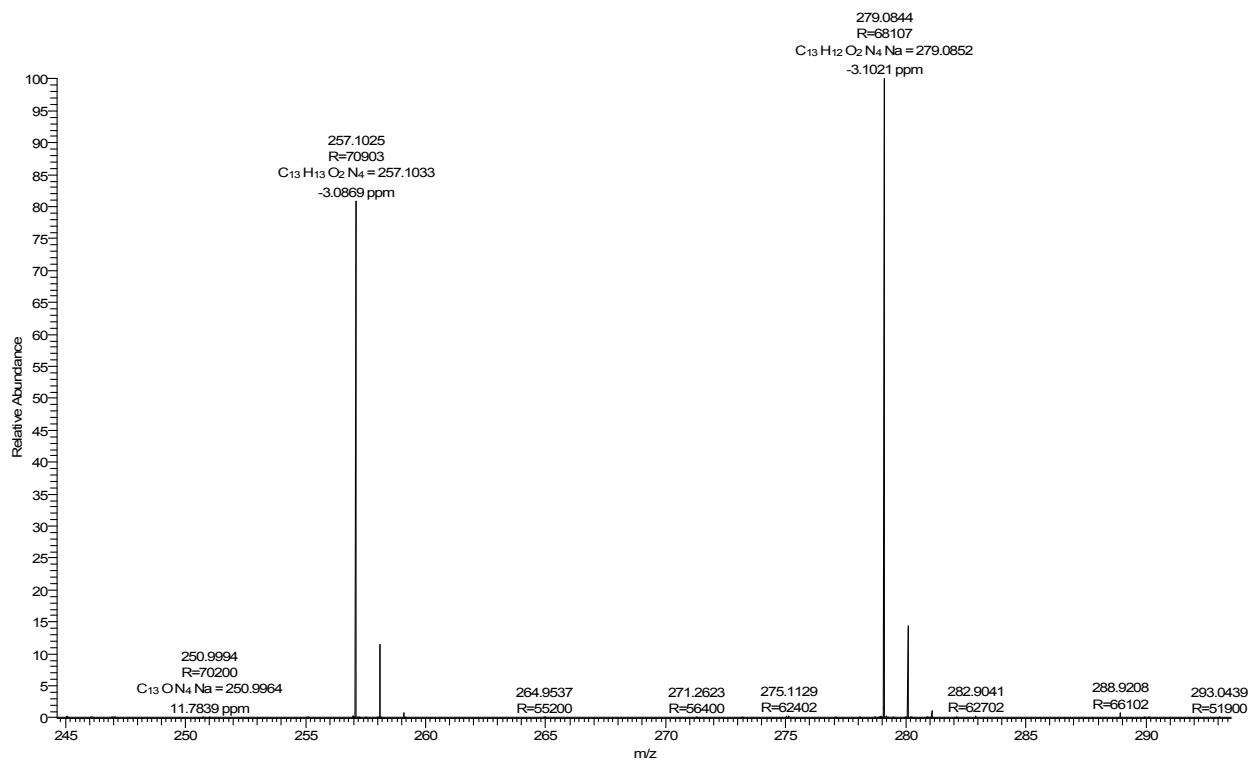

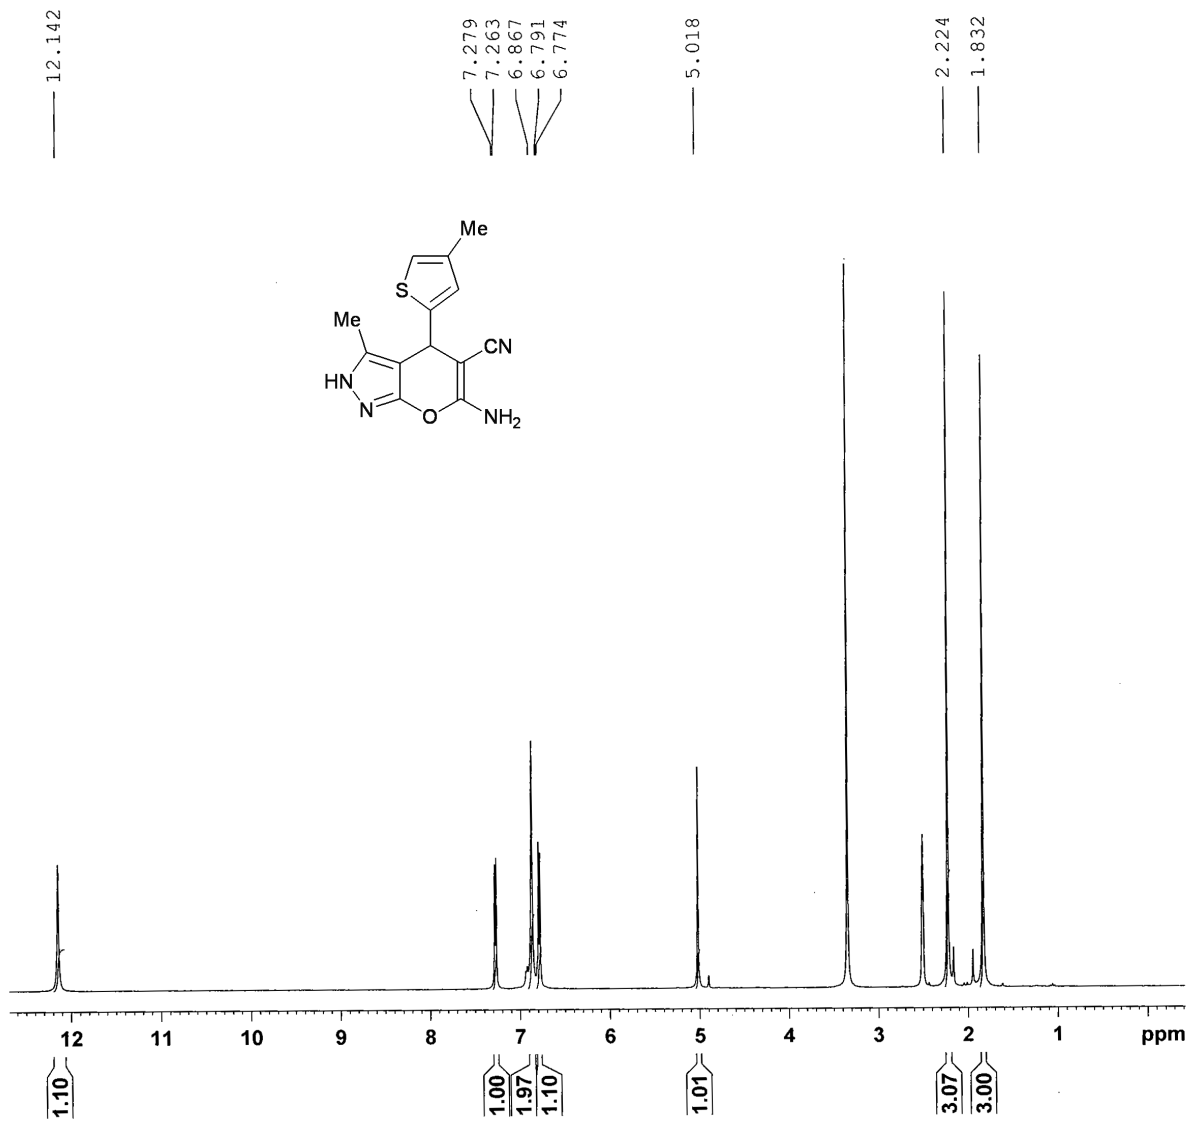

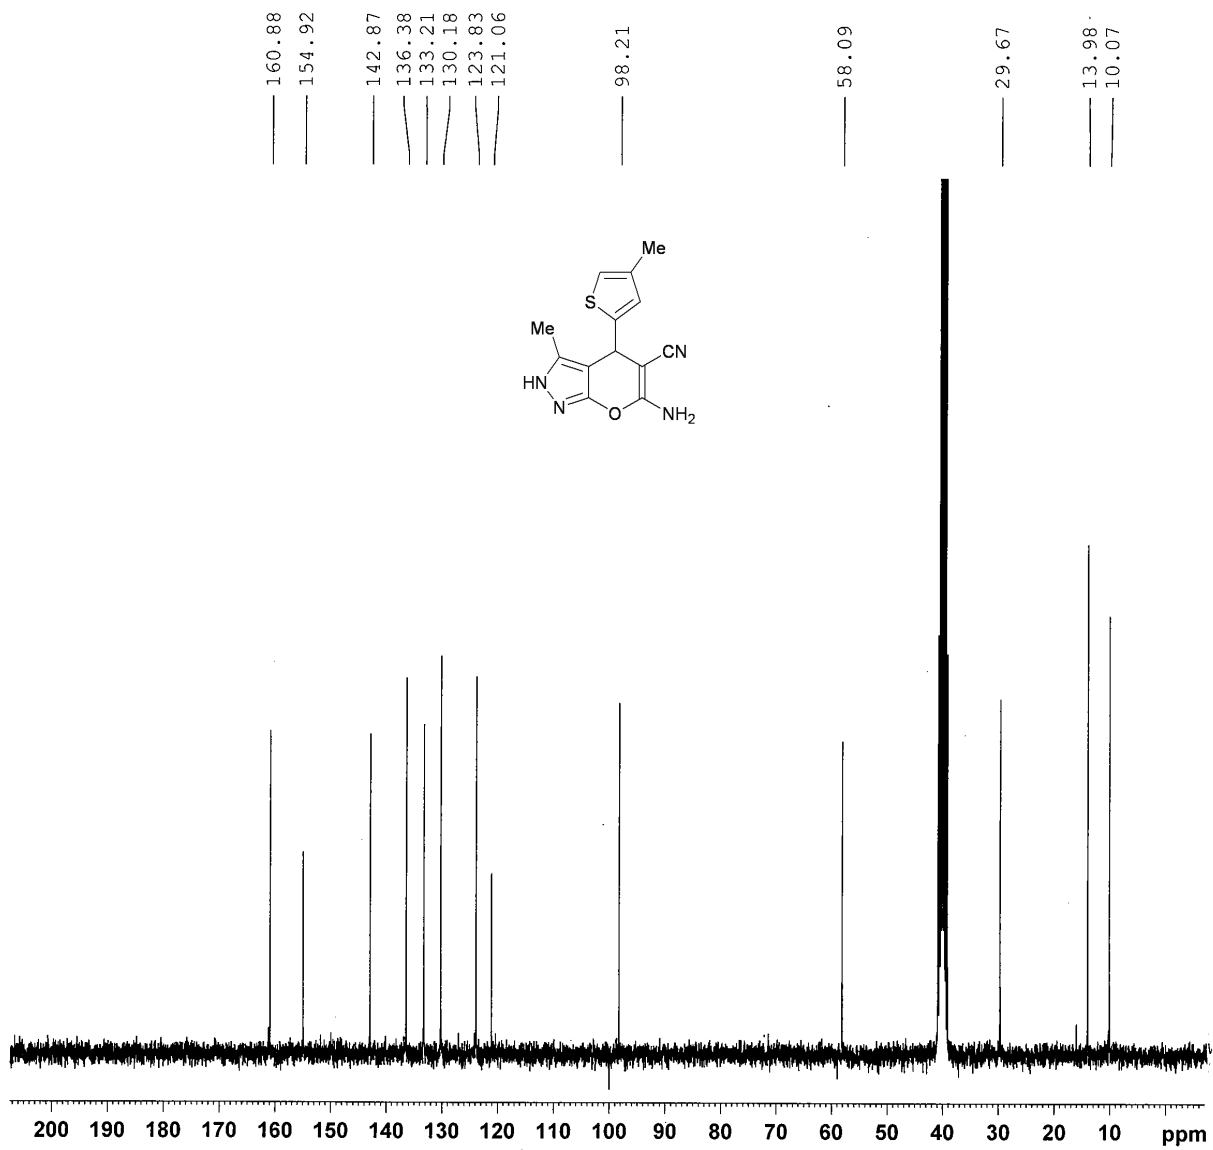

130.182  
123.835

29.663

13.978  
10.068

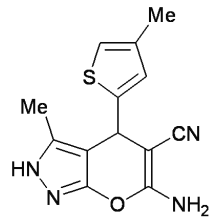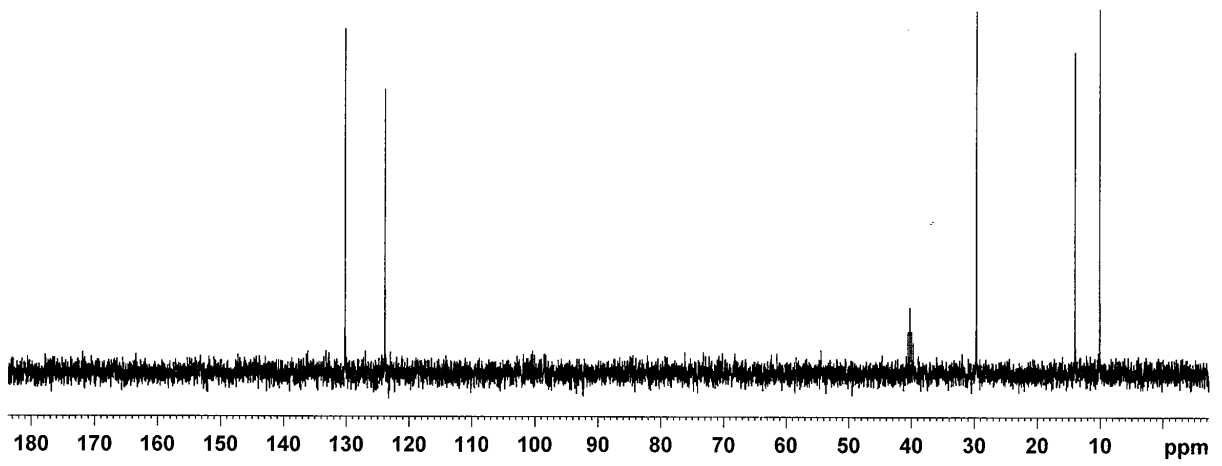

B-2\_141107170616 #860 RT: 3.83 AV: 1 NL: 6.70E8  
T: FTMS + p ESI Full ms [66.70-1000.00]

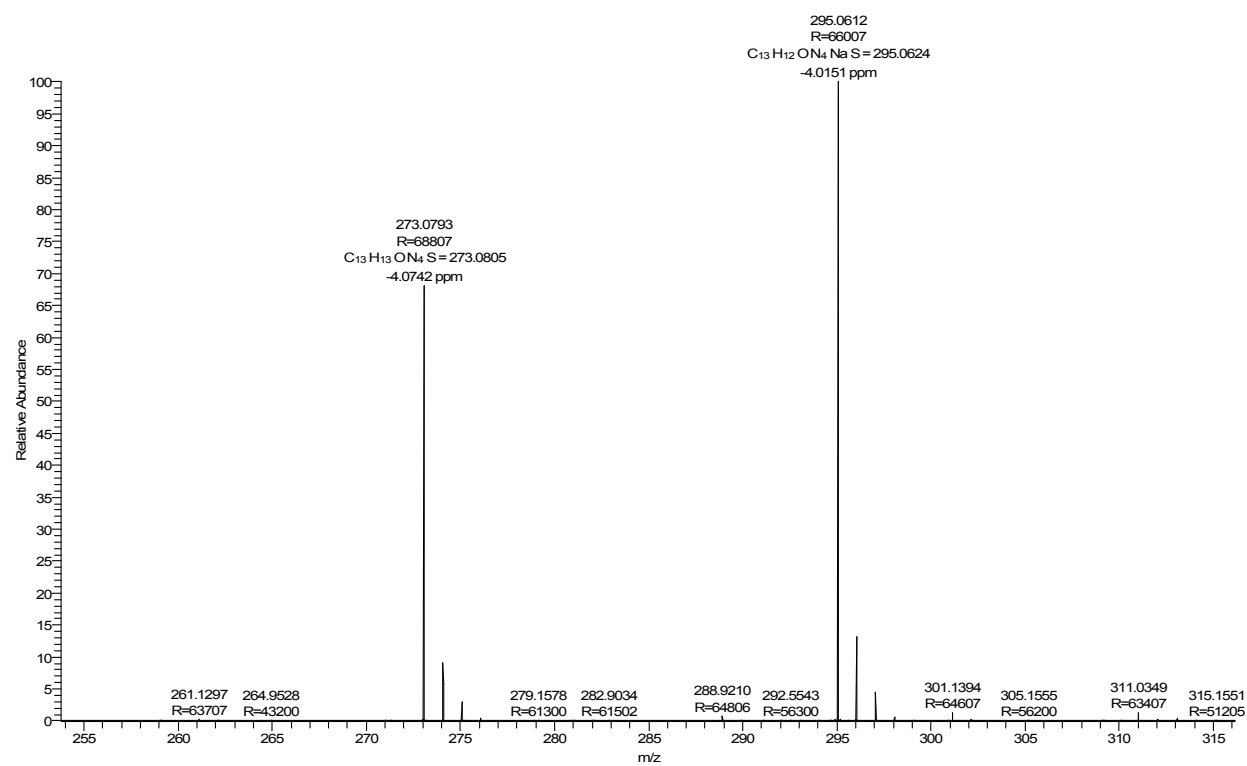

Supplement: c4nj02346c1.pdf [file c4nj02346c1.pdf]
